# Supplementary material for: Bioactive Hydroperoxyl Cembranoids from the Red Sea Soft Coral Sarcophyton glaucum
Source: PubMed Central journal article supplement (PMC3280536; doi:10.3390/md10010209), 2012-01-18
Supplement: marinedrugs-10-00209-s001.pdf [file marinedrugs-10-00209-s001.pdf]

Re-3-5-55  
in CDC13  
SW Probe  
mkh031810.1

Pulse Sequence: s2pu1

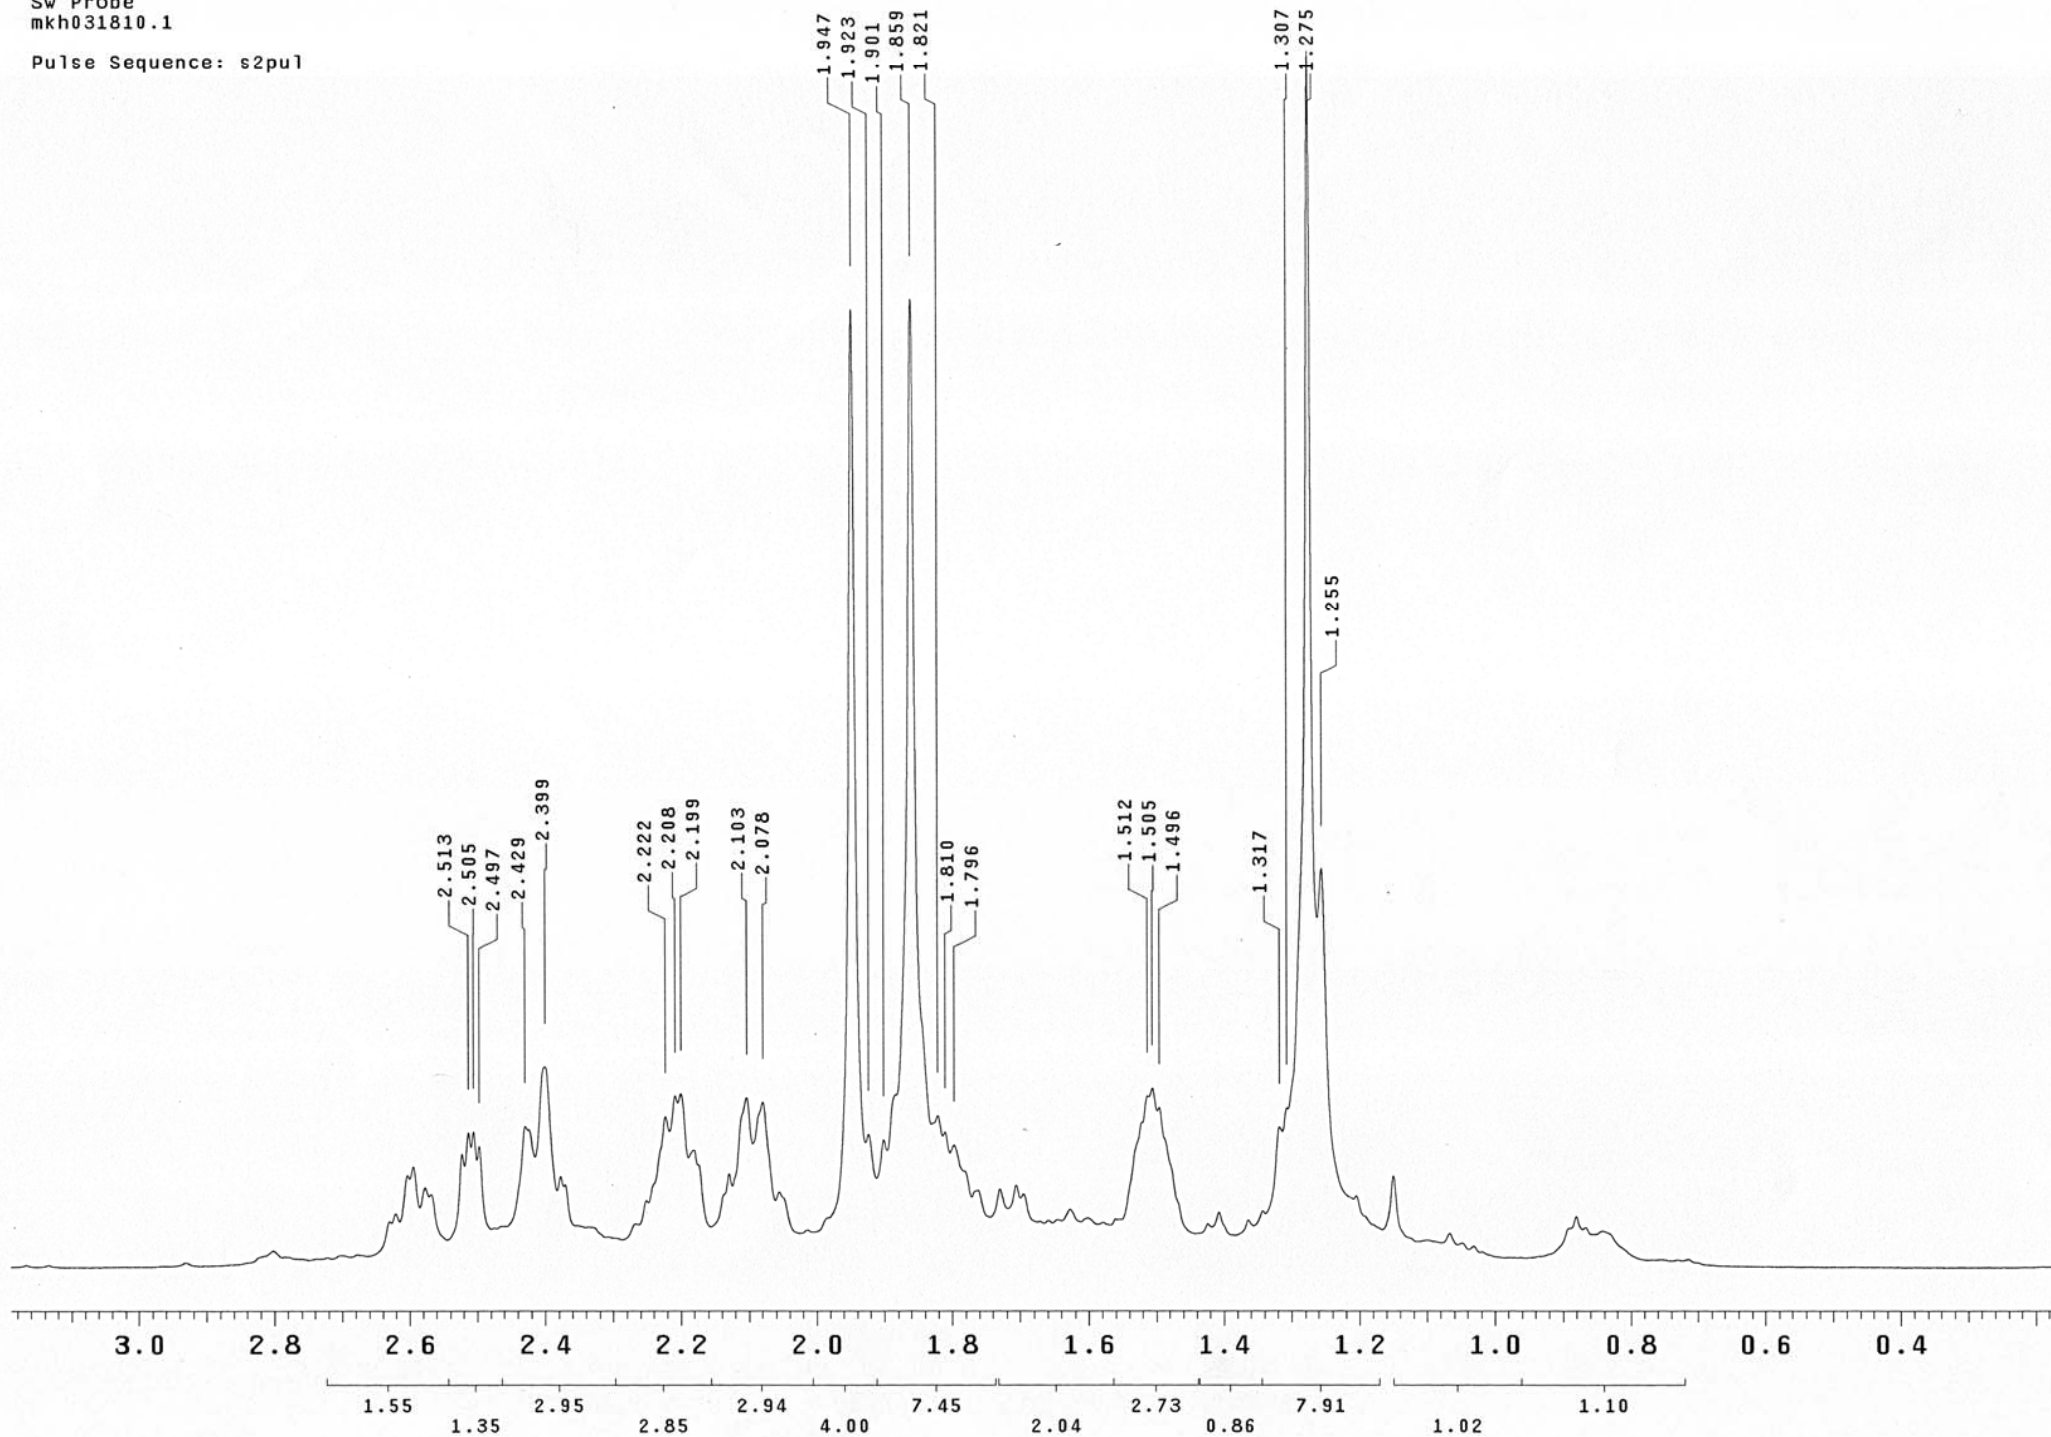

Re-3-5-55  
in CDCl3  
SW Probe  
mkh031810.1

Pulse Sequence: s2pu1

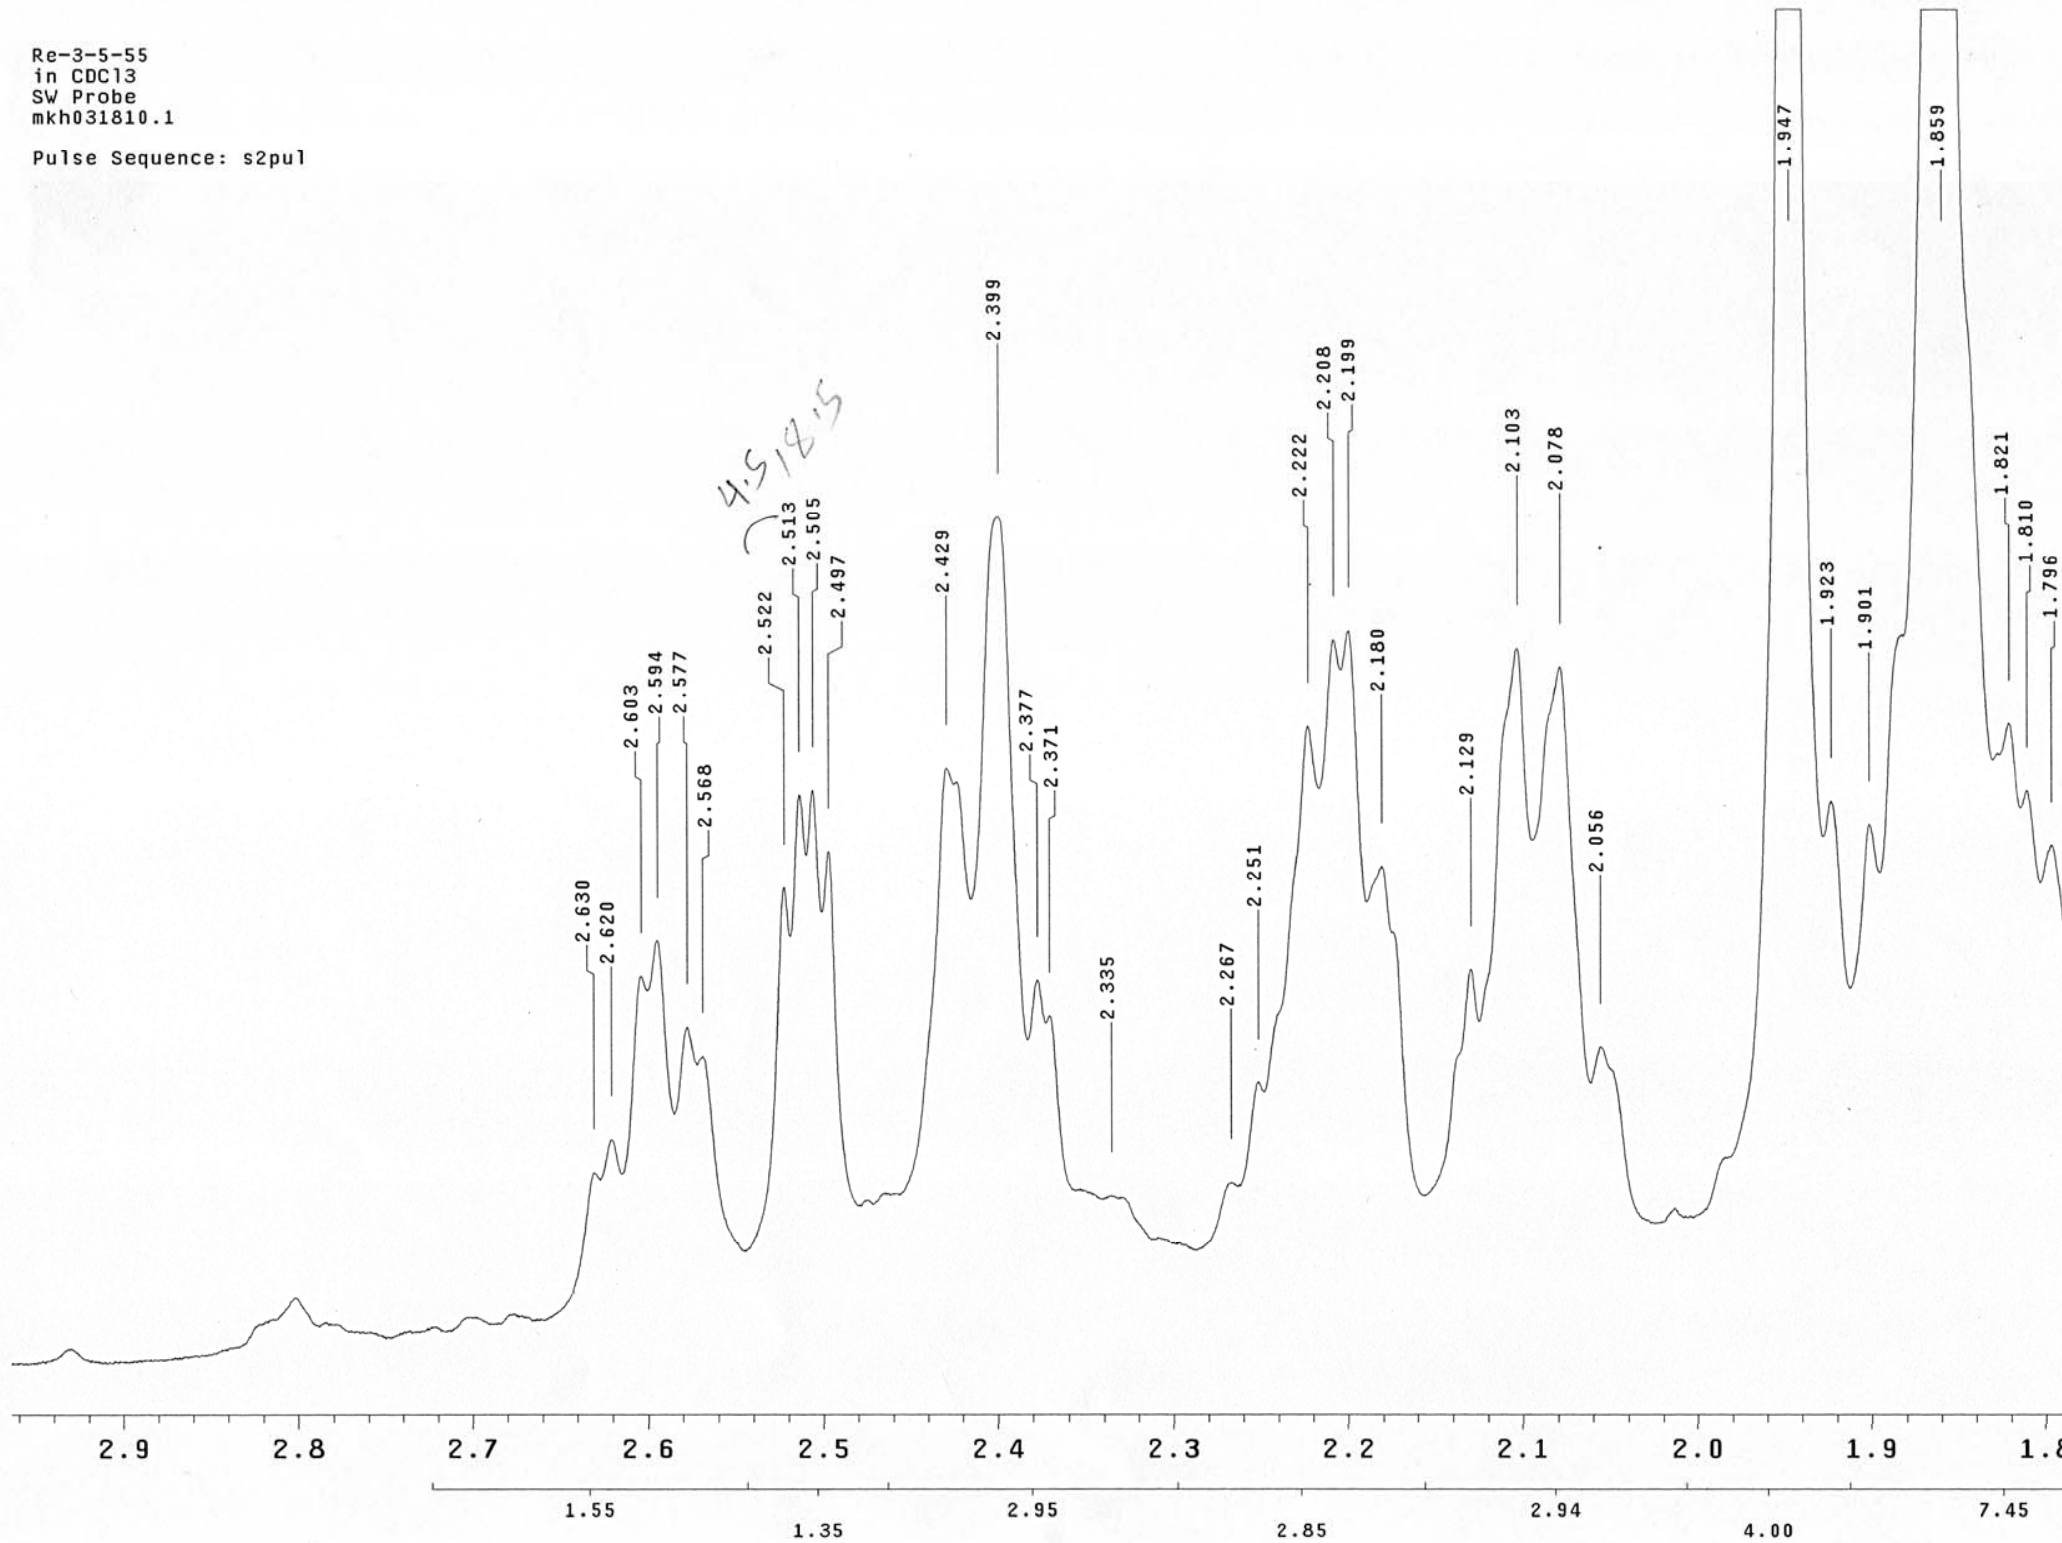

Re-3-5-55  
in CDCl3  
SW Probe  
mkh031810.1

Pulse Sequence: s2pu1

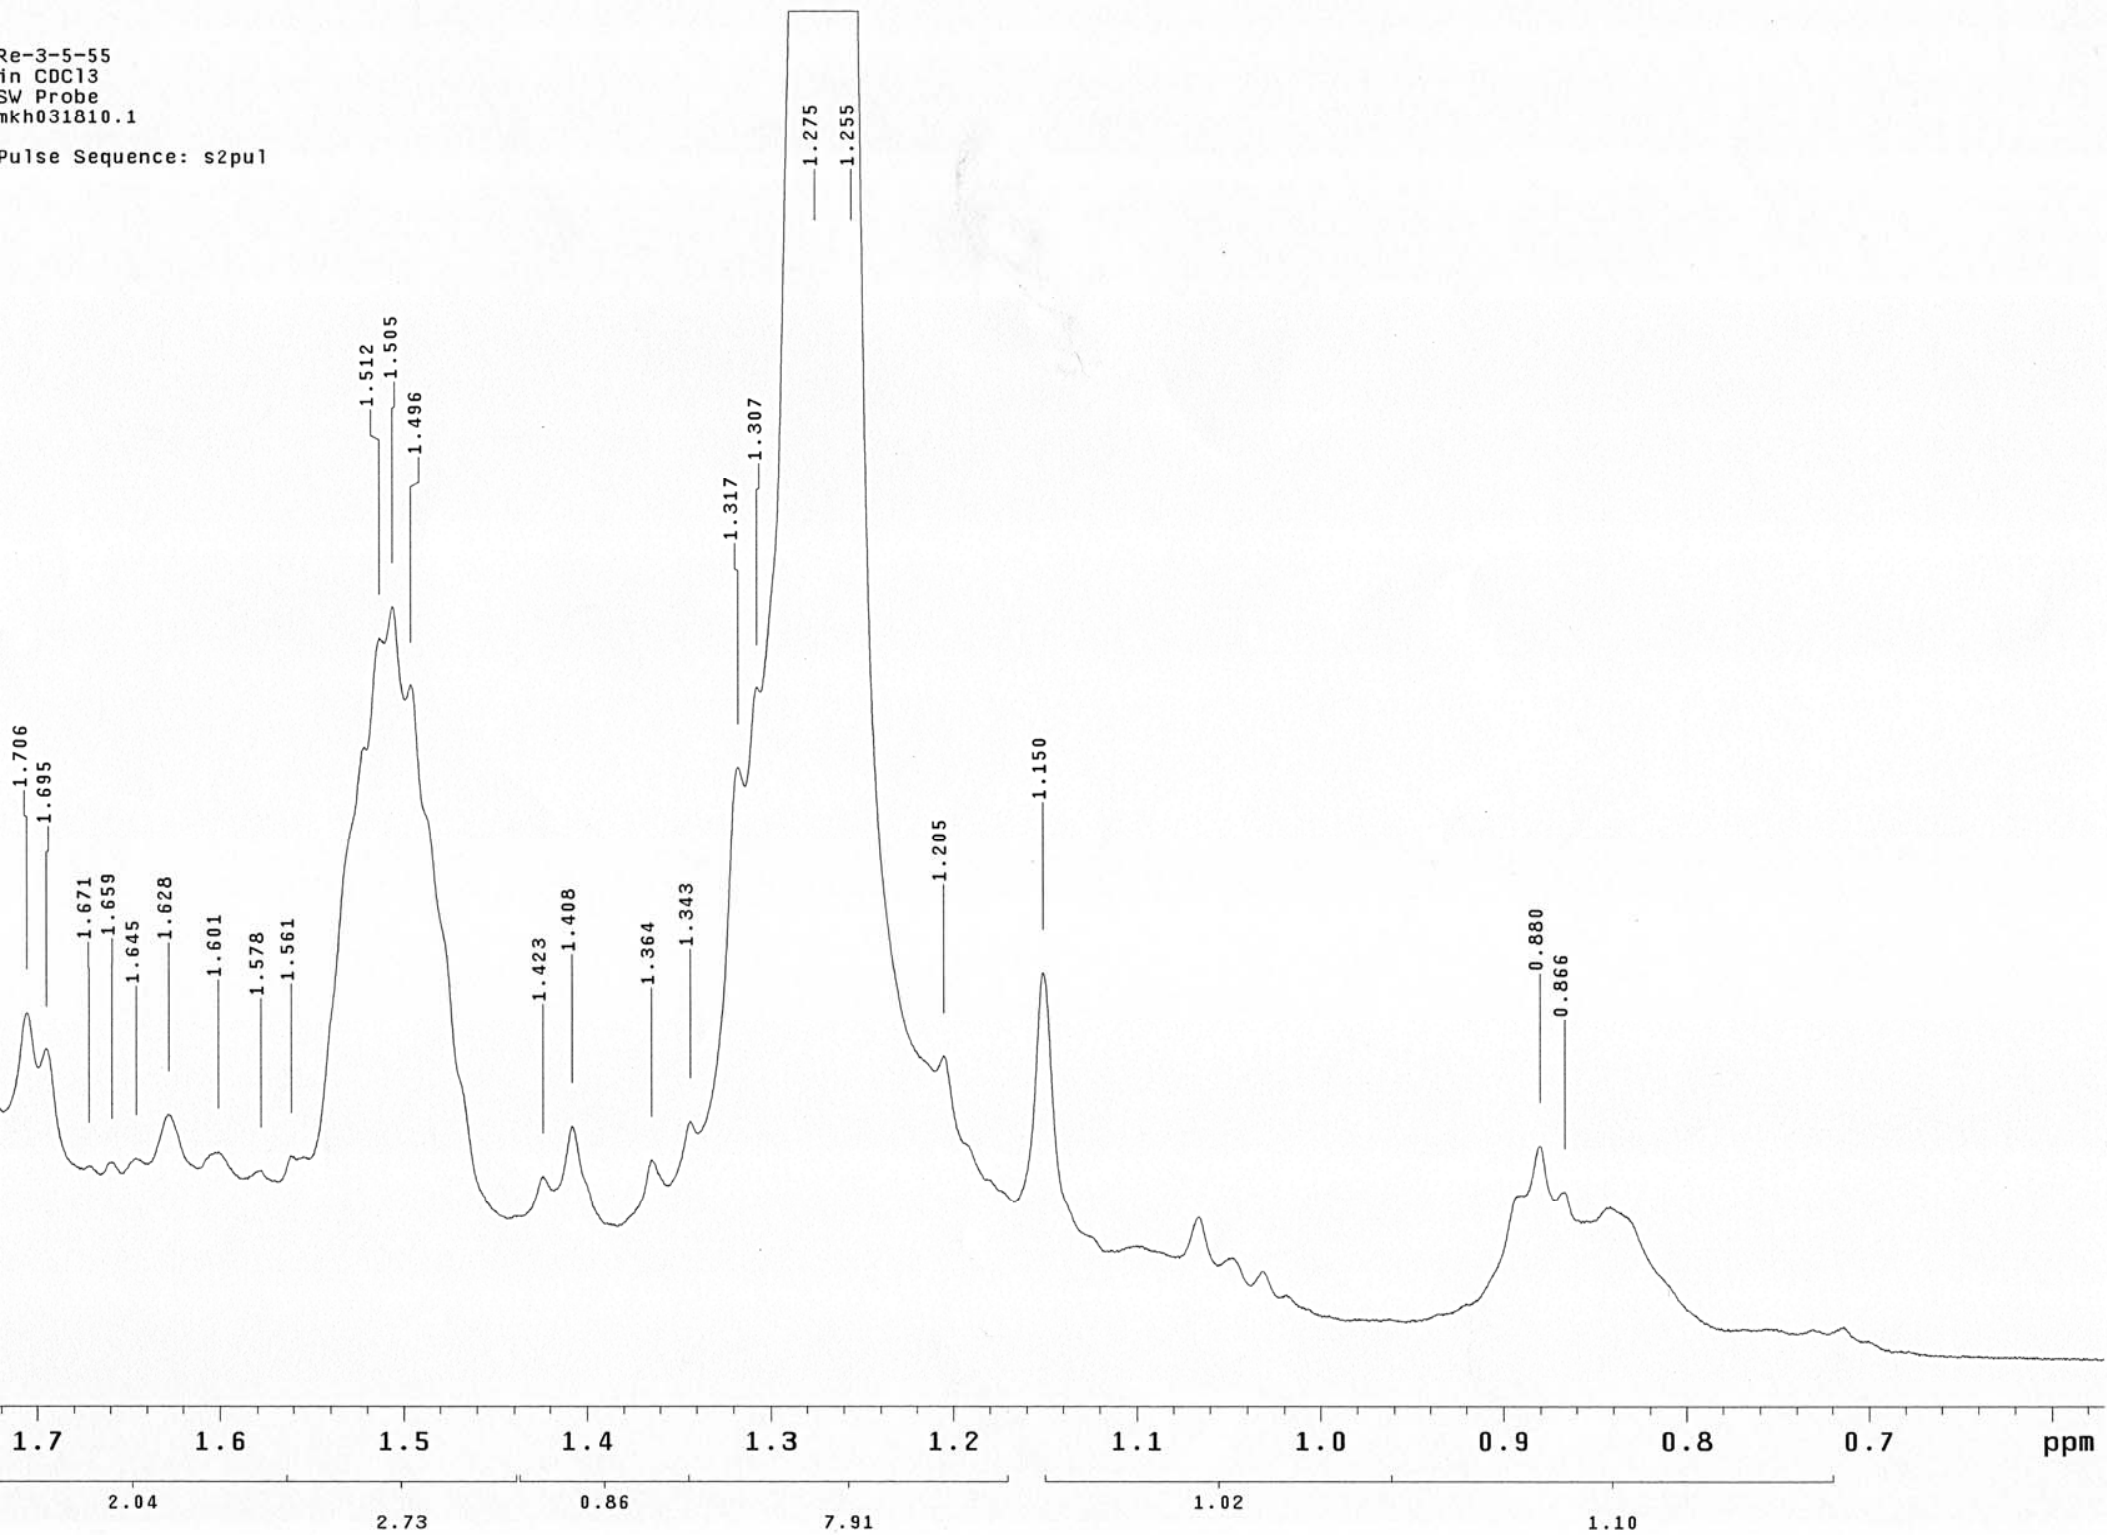

Re-3-5-55  
in CDC13  
SW Probe  
mkc031810.1

Pulse Sequence: s2pu1

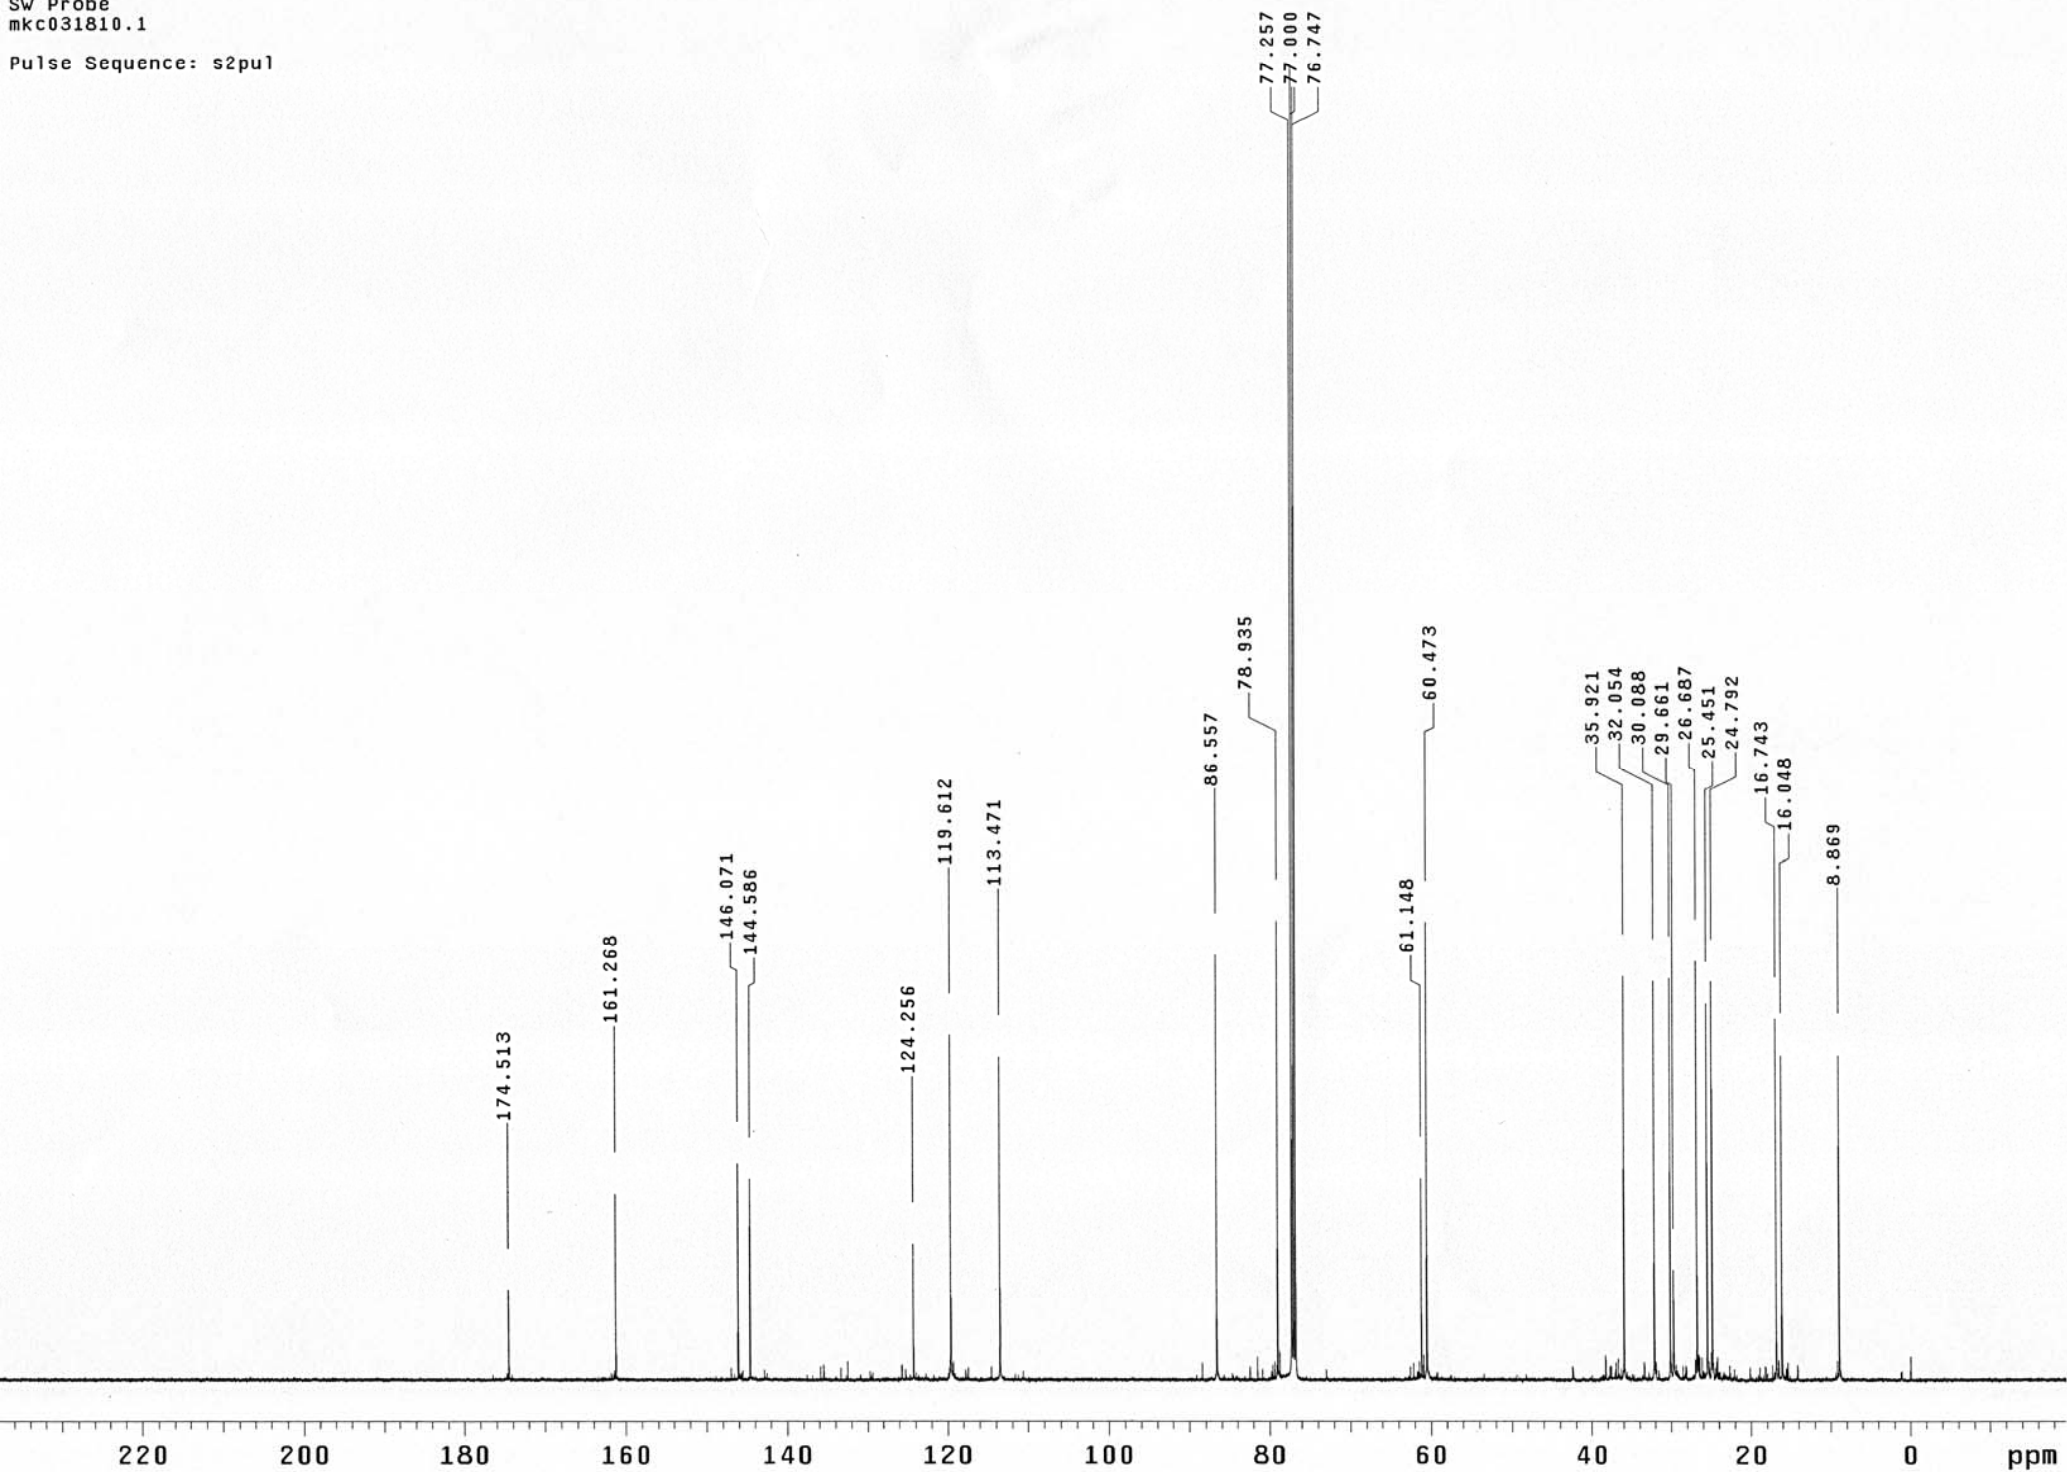

Re-3-5-55  
in CDCl3  
SW Probe  
mkc031810.1

Pulse Sequence: s2pu1

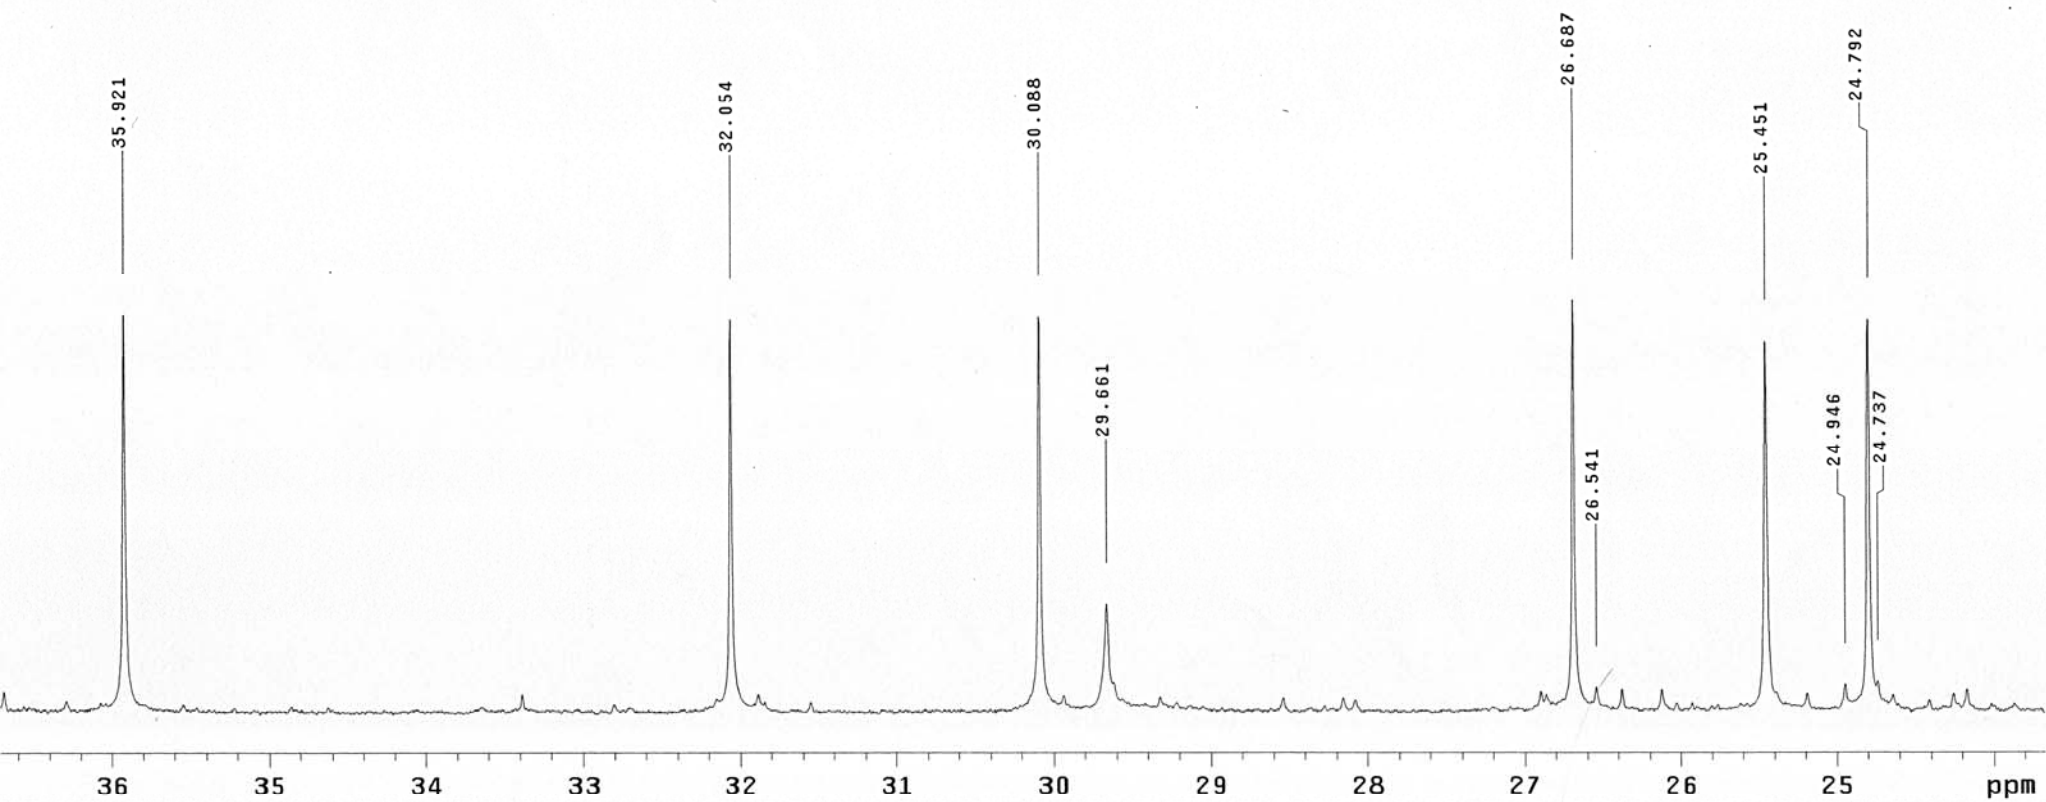

Re-3-5-55  
Gradient COSY  
in CDC13  
SW Probe  
mkgcosy031810.1

Pulse Sequence: gCOSY  
Solvent: CDC13  
Temp. 23.0 C / 296.1 K  
INOVA-500 "inova500a"

Relax. delay 1.000 sec  
Acq. time 0.745 sec  
Width 5497.5 Hz  
2D Width 5497.5 Hz  
2 repetitions  
256 increments  
OBSERVE H1, 499.7081714 MHz  
DATA PROCESSING  
Sq. sine bell 0.093 sec  
F1 DATA PROCESSING  
Sq. sine bell 0.023 sec  
FT size 8192 x 8192  
Total time 15 min, 40 sec

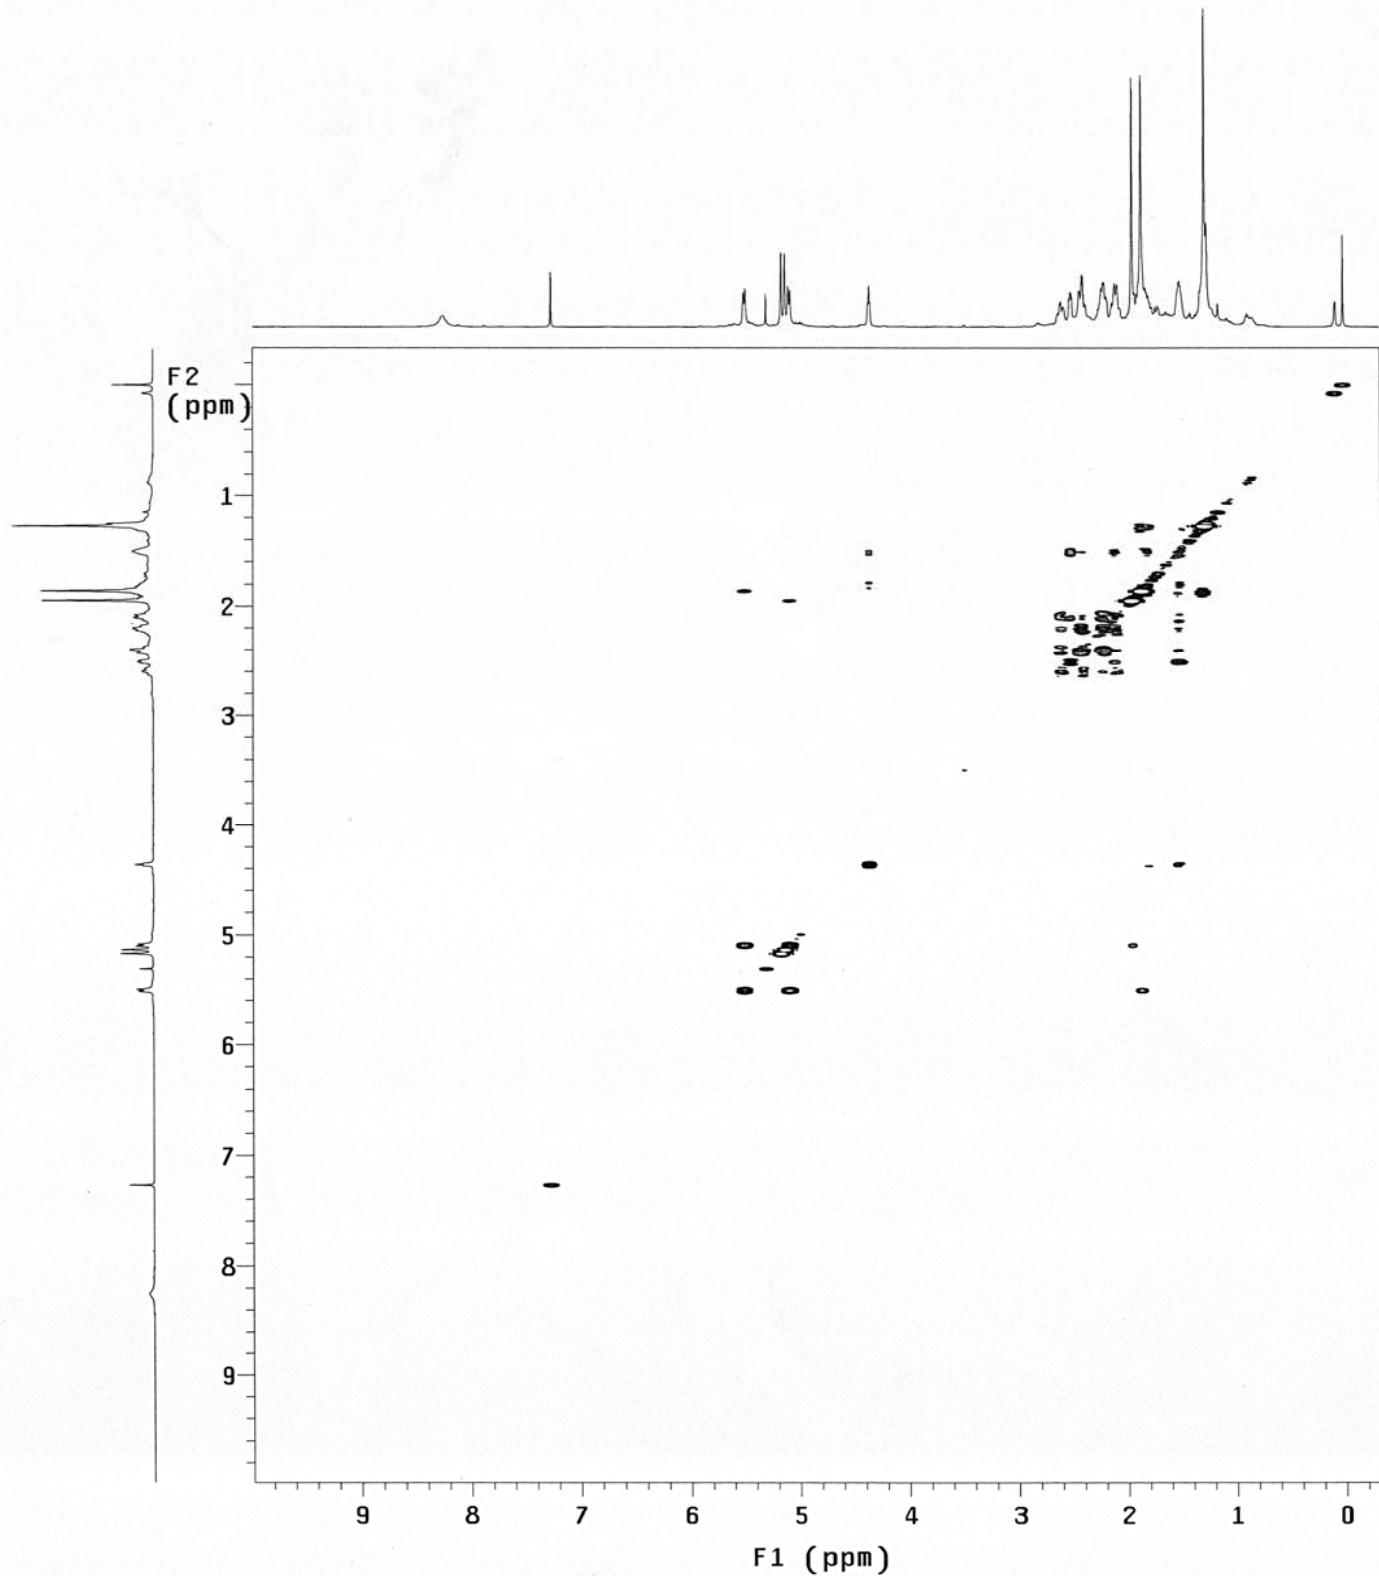

Re-3-5-55  
Gradient HSQC  
all peaks  
in CDC13  
SW Probe  
mkghsqc031810.1

Pulse Sequence: gHSQC

Solvent: CDC13  
Temp. 23.0 C / 296.1 K  
User: 1-14-87  
INOVA-500 "inova500a"

Relax. delay 1.000 sec  
Acq. time 0.186 sec  
Width 5497.5 Hz  
2D Width 21361.8 Hz  
24 repetitions  
2 x 128 increments  
OBSERVE H1, 499.7081714 MHz  
DECOUPLE C13, 125.6611136 MHz  
Power 43 dB  
on during acquisition  
off during delay  
GARP-1 modulated  
DATA PROCESSING  
Gauss apodization 0.086 sec  
F1 DATA PROCESSING  
Gauss apodization 0.011 sec  
FT size 2048 x 2048  
Total time 2 hr, 9 min, 27 sec

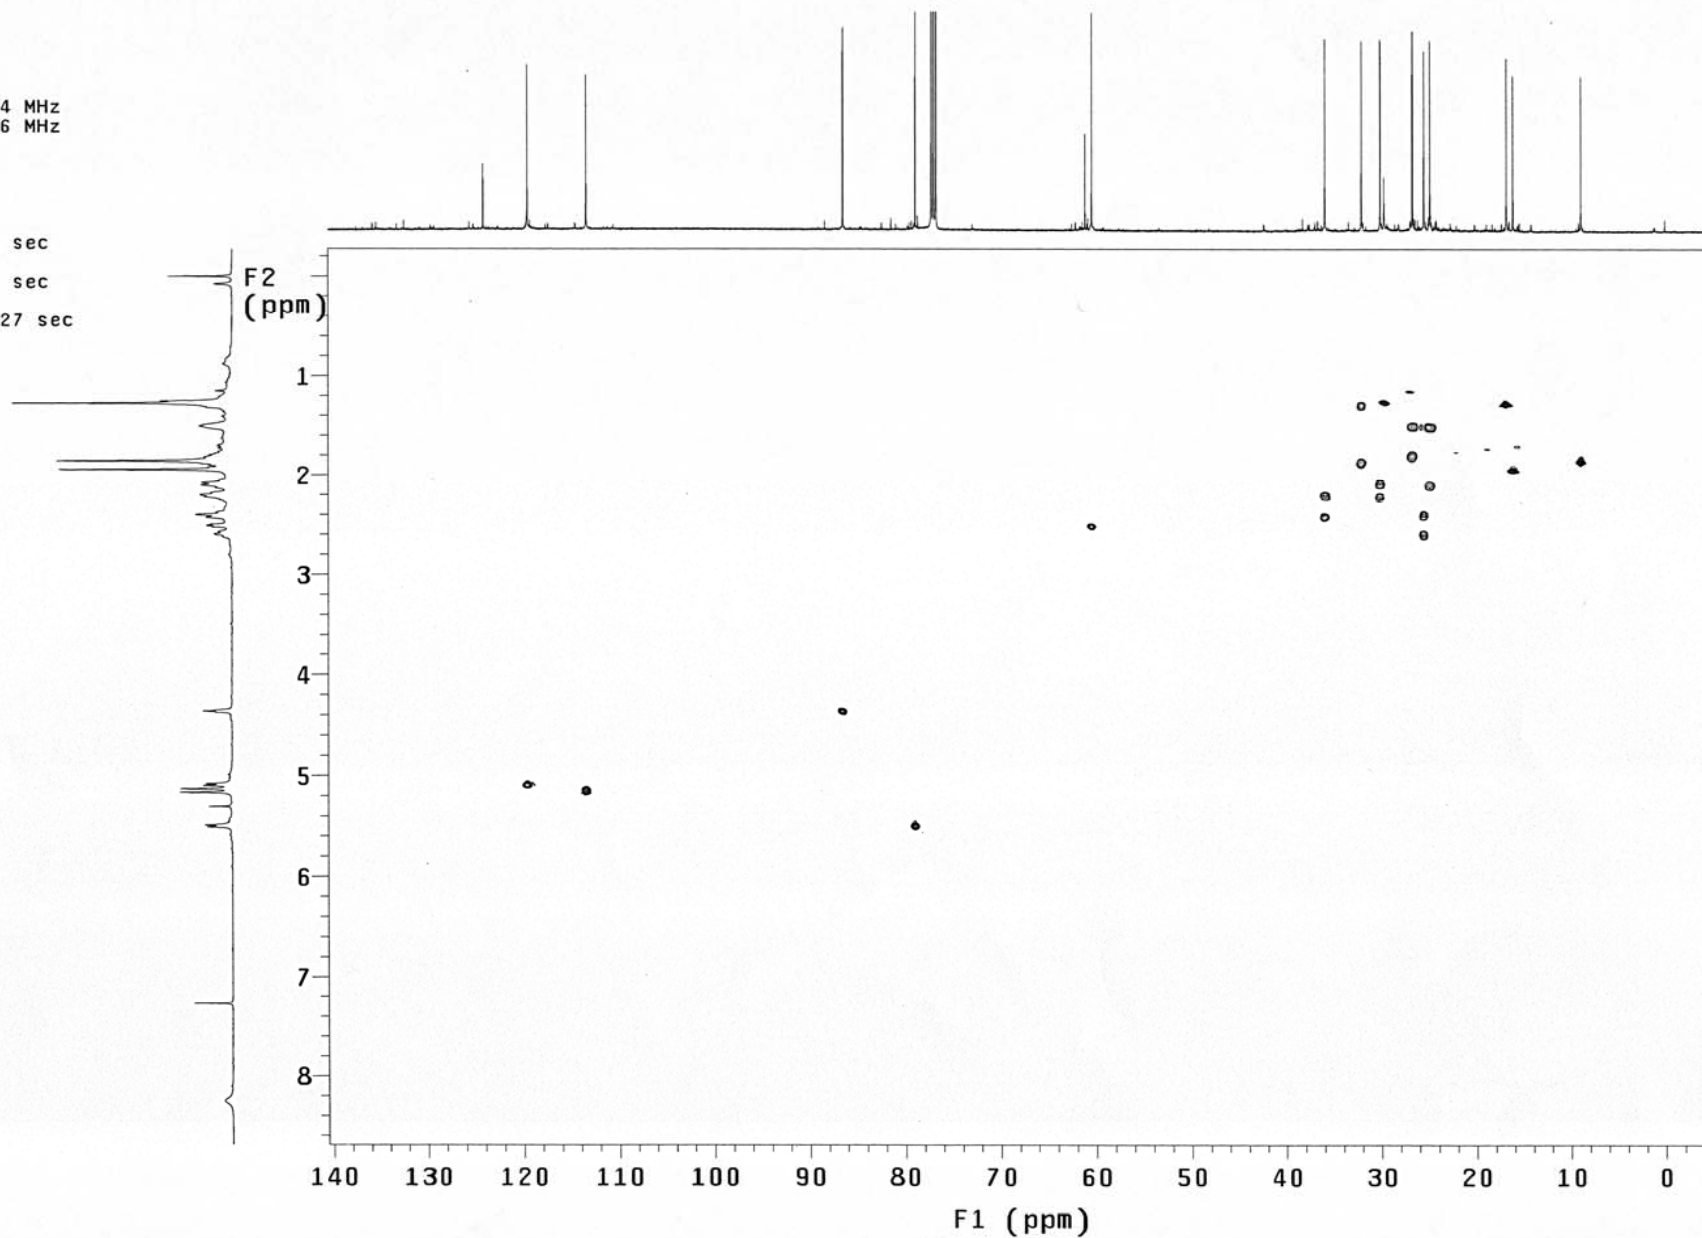

Re-3-5-55  
Gradient HMBC  
in CDCl3  
SW Probe  
mkghmbc031810.1

Pulse Sequence: gHMBC

Solvent: CDCl3  
Temp. 23.0 C / 296.1 K  
User: 1-14-87  
INOVA-500 "inova500a"

Relax. delay 1.000 sec  
Acq. time 0.186 sec  
Width 5497.5 Hz  
2D Width 30154.5 Hz  
96 repetitions  
400 increments  
OBSERVE H1, 499.7081714 MHz  
DATA PROCESSING  
Sine bell 0.093 sec  
F1 DATA PROCESSING  
Sine bell 0.007 sec  
FT size 2048 x 2048  
Total time 13 hr, 36 min, 26 sec

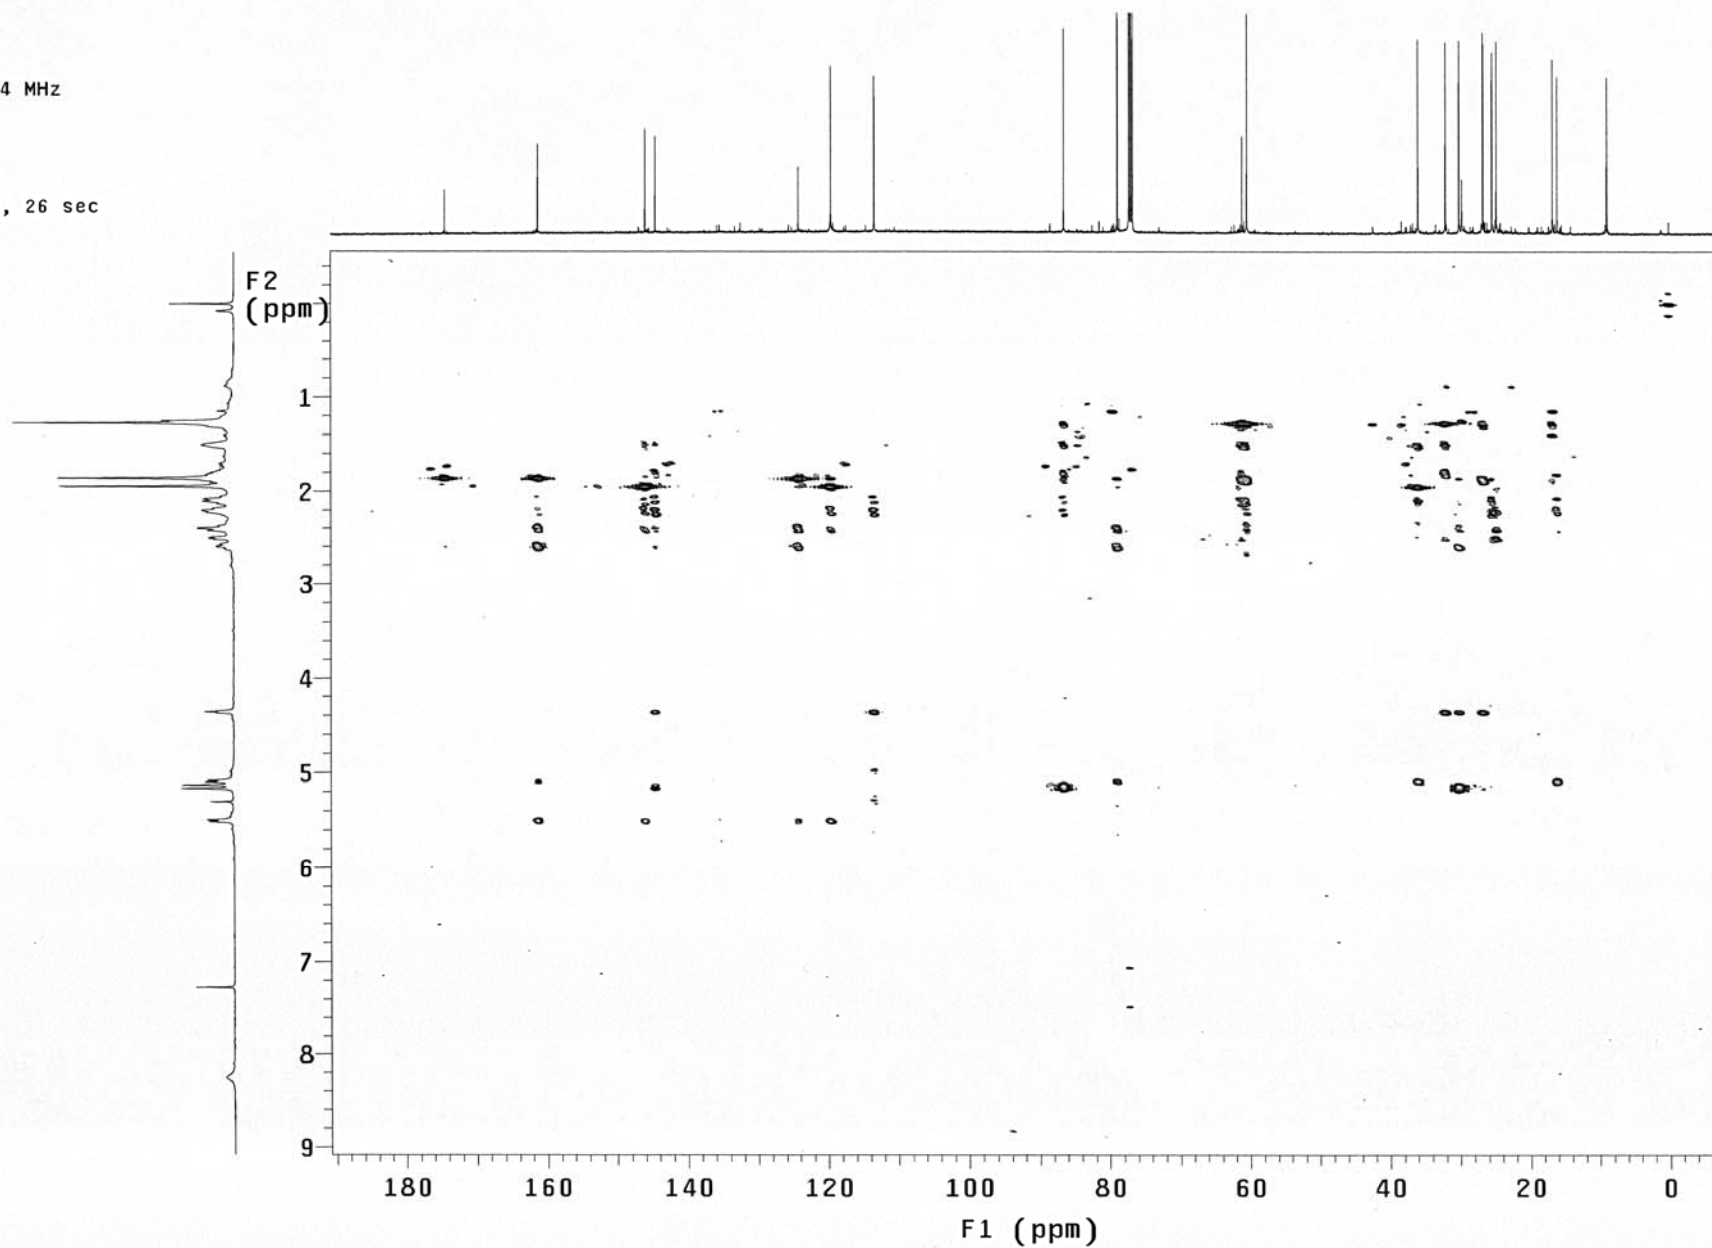



Re-3-5-55  
Gradient HMBC  
in CDCl3  
SW Probe  
mkghmbc031810.1

Pulse Sequence: gHMBC

Solvent: CDCl3  
Temp. 23.0 C / 296.1 K  
User: 1-14-87  
INOVA-500 "inova500a"

Relax. delay 1.000 sec  
Acq. time 0.186 sec  
Width 5497.5 Hz  
2D Width 30154.5 Hz  
96 repetitions  
400 increments  
OBSERVE H1, 499.7081714 MHz  
DATA PROCESSING  
Sine bell 0.093 sec  
F1 DATA PROCESSING  
Sine bell 0.007 sec  
FT size 2048 x 2048  
Total time 13 hr, 36 min, 26 sec



Re-3-5-55  
NOESY  
all peaks  
d1=1 mix=1 sec  
in CDC13  
SW Probe  
mknoesy031810.1

Pulse Sequence: NOESY  
Solvent: CDC13  
Temp. 23.0 C / 296.1 K  
INOVA-500 "inova500a"

Relax. delay 3.000 sec  
Mixing 1.000 sec  
Acq. time 0.745 sec  
Width 5497.5 Hz  
2D Width 5497.5 Hz  
32 repetitions  
2 x 256 increments  
OBSERVE H1, 499.7081714 MHz  
DATA PROCESSING  
Gauss apodization 0.086 sec  
F1 DATA PROCESSING  
Gauss apodization 0.034 sec  
FT size 8192 x 8192  
Total time 21 hr, 48 min, 20 sec

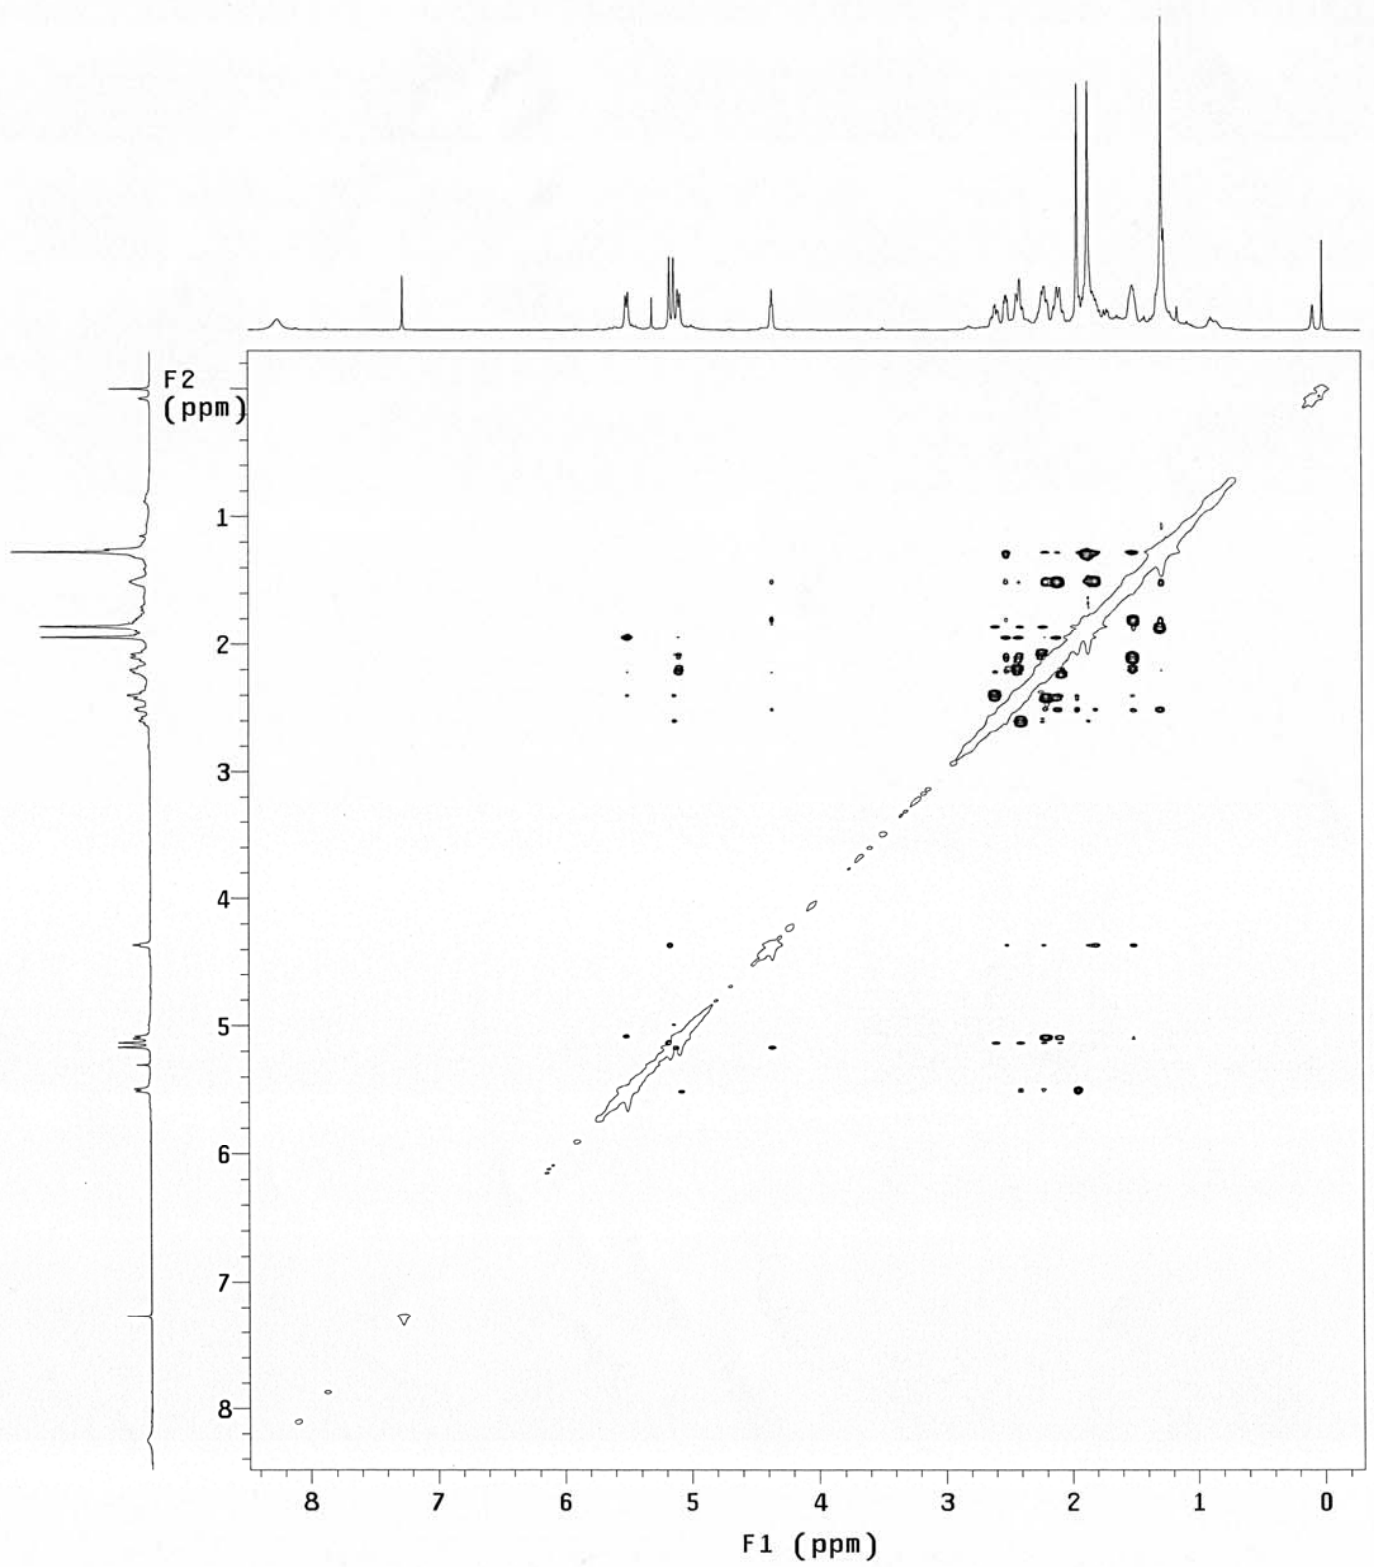

Re-3-5-55  
NOESY  
all peaks  
d1=1 mix=1 sec  
in CDC13  
SW Probe  
mknoesy031810.1

Pulse Sequence: NOESY  
Solvent: CDC13  
Temp. 23.0 C / 296.1 K  
INOVA-500 "inova500a"

Relax. delay 3.000 sec  
Mixing 1.000 sec  
Acq. time 0.745 sec  
Width 5497.5 Hz  
2D Width 5497.5 Hz  
32 repetitions  
2 x 256 increments  
OBSERVE H1, 499.7081714 MHz  
DATA PROCESSING  
Gauss apodization 0.086 sec  
F1 DATA PROCESSING  
Gauss apodization 0.034 sec  
FT size 8192 x 8192  
Total time 21 hr, 48 min, 20 sec



3-5-55  
CDC13  
Probe  
031810.1

se Sequence: s2pu1

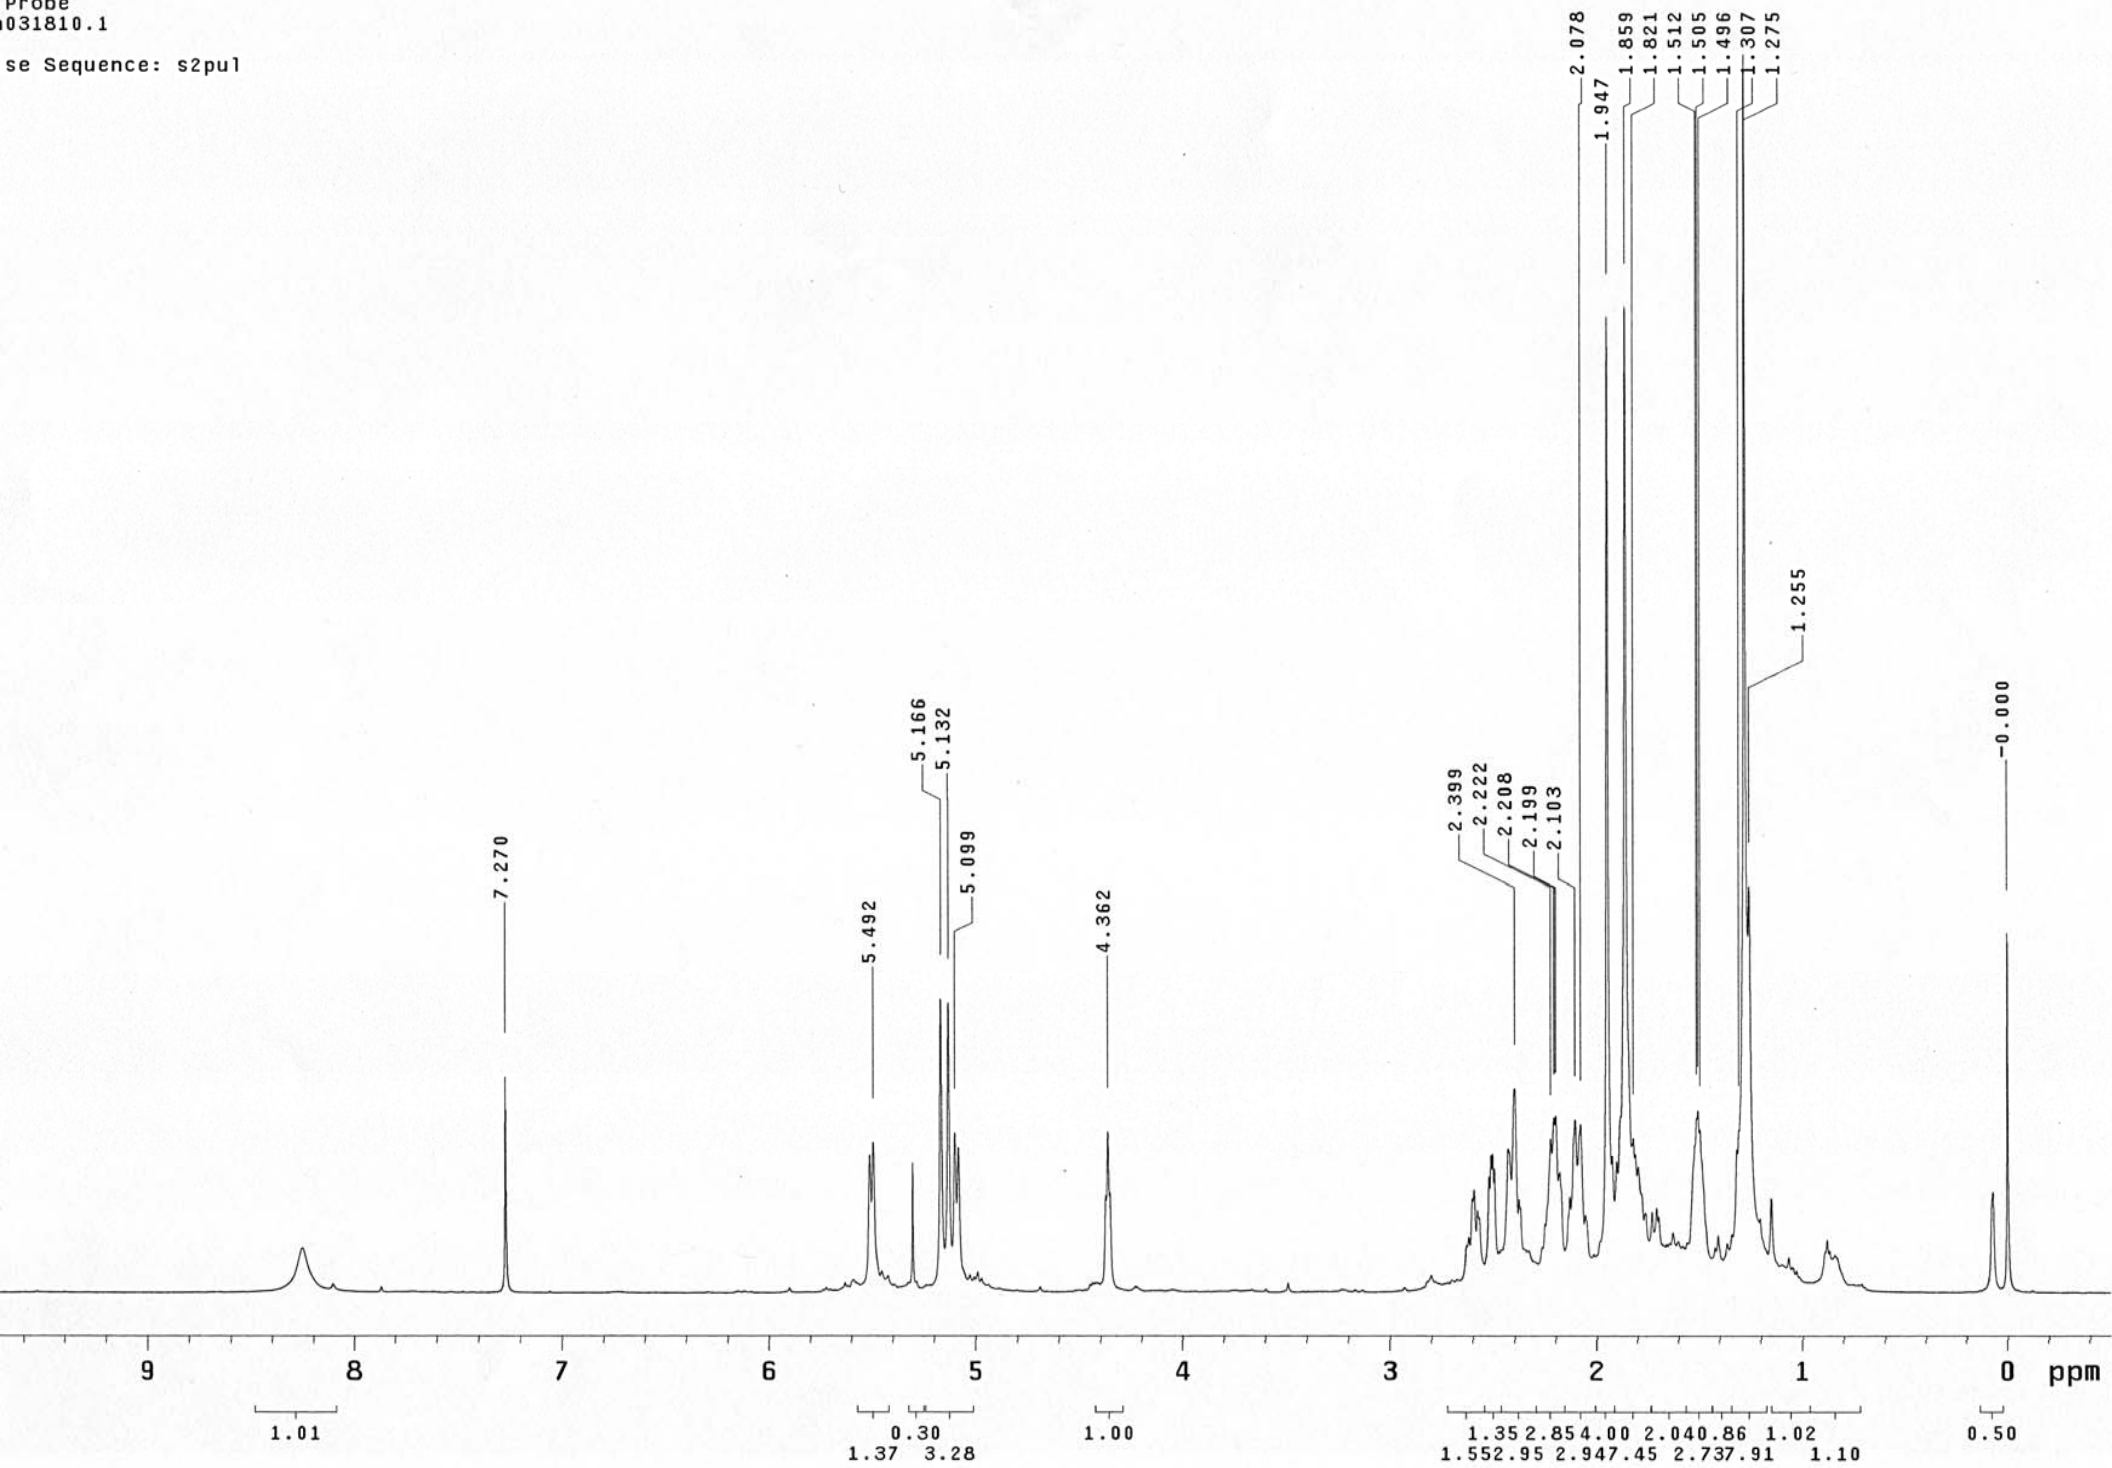

Re-3-55-8  
Gradient HMBC  
in CDCl3  
SW Probe  
mkghmbc040710.1

Pulse Sequence: gHMBC

Solvent: CDCl3  
Temp. 23.0 C / 296.1 K  
User: 1-14-87  
INOVA-500 "inova500a"

Relax. delay 1.000 sec  
Acq. time 0.205 sec  
Width 5006.3 Hz  
2D Width 30154.5 Hz  
32 repetitions  
400 increments  
OBSERVE H1, 499.7081720 MHz  
DATA PROCESSING  
Sine bell 0.102 sec  
F1 DATA PROCESSING  
Sine bell 0.007 sec  
FT size 2048 x 2048  
Total time 4 hr, 36 min, 30 sec

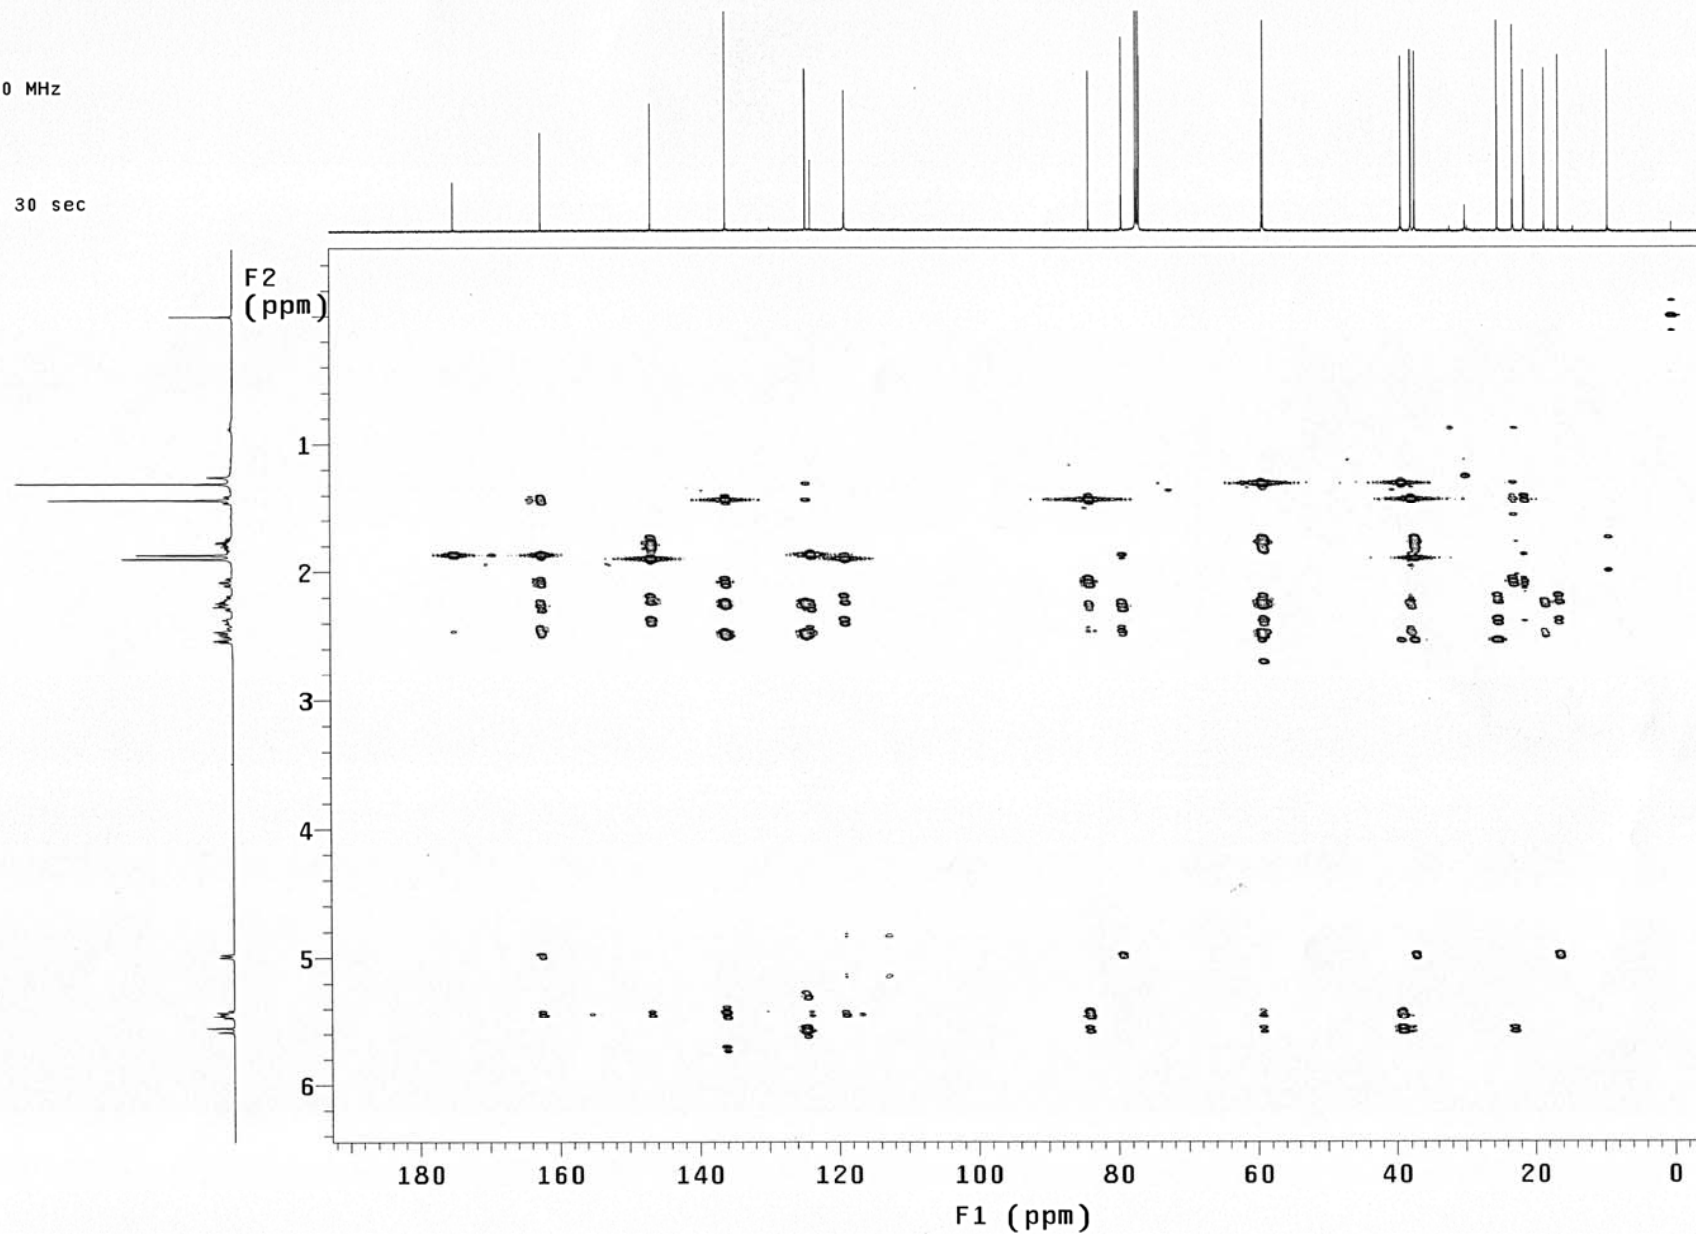

1-55-8  
DC13  
probe  
40710.1

Sequence: s2pu1

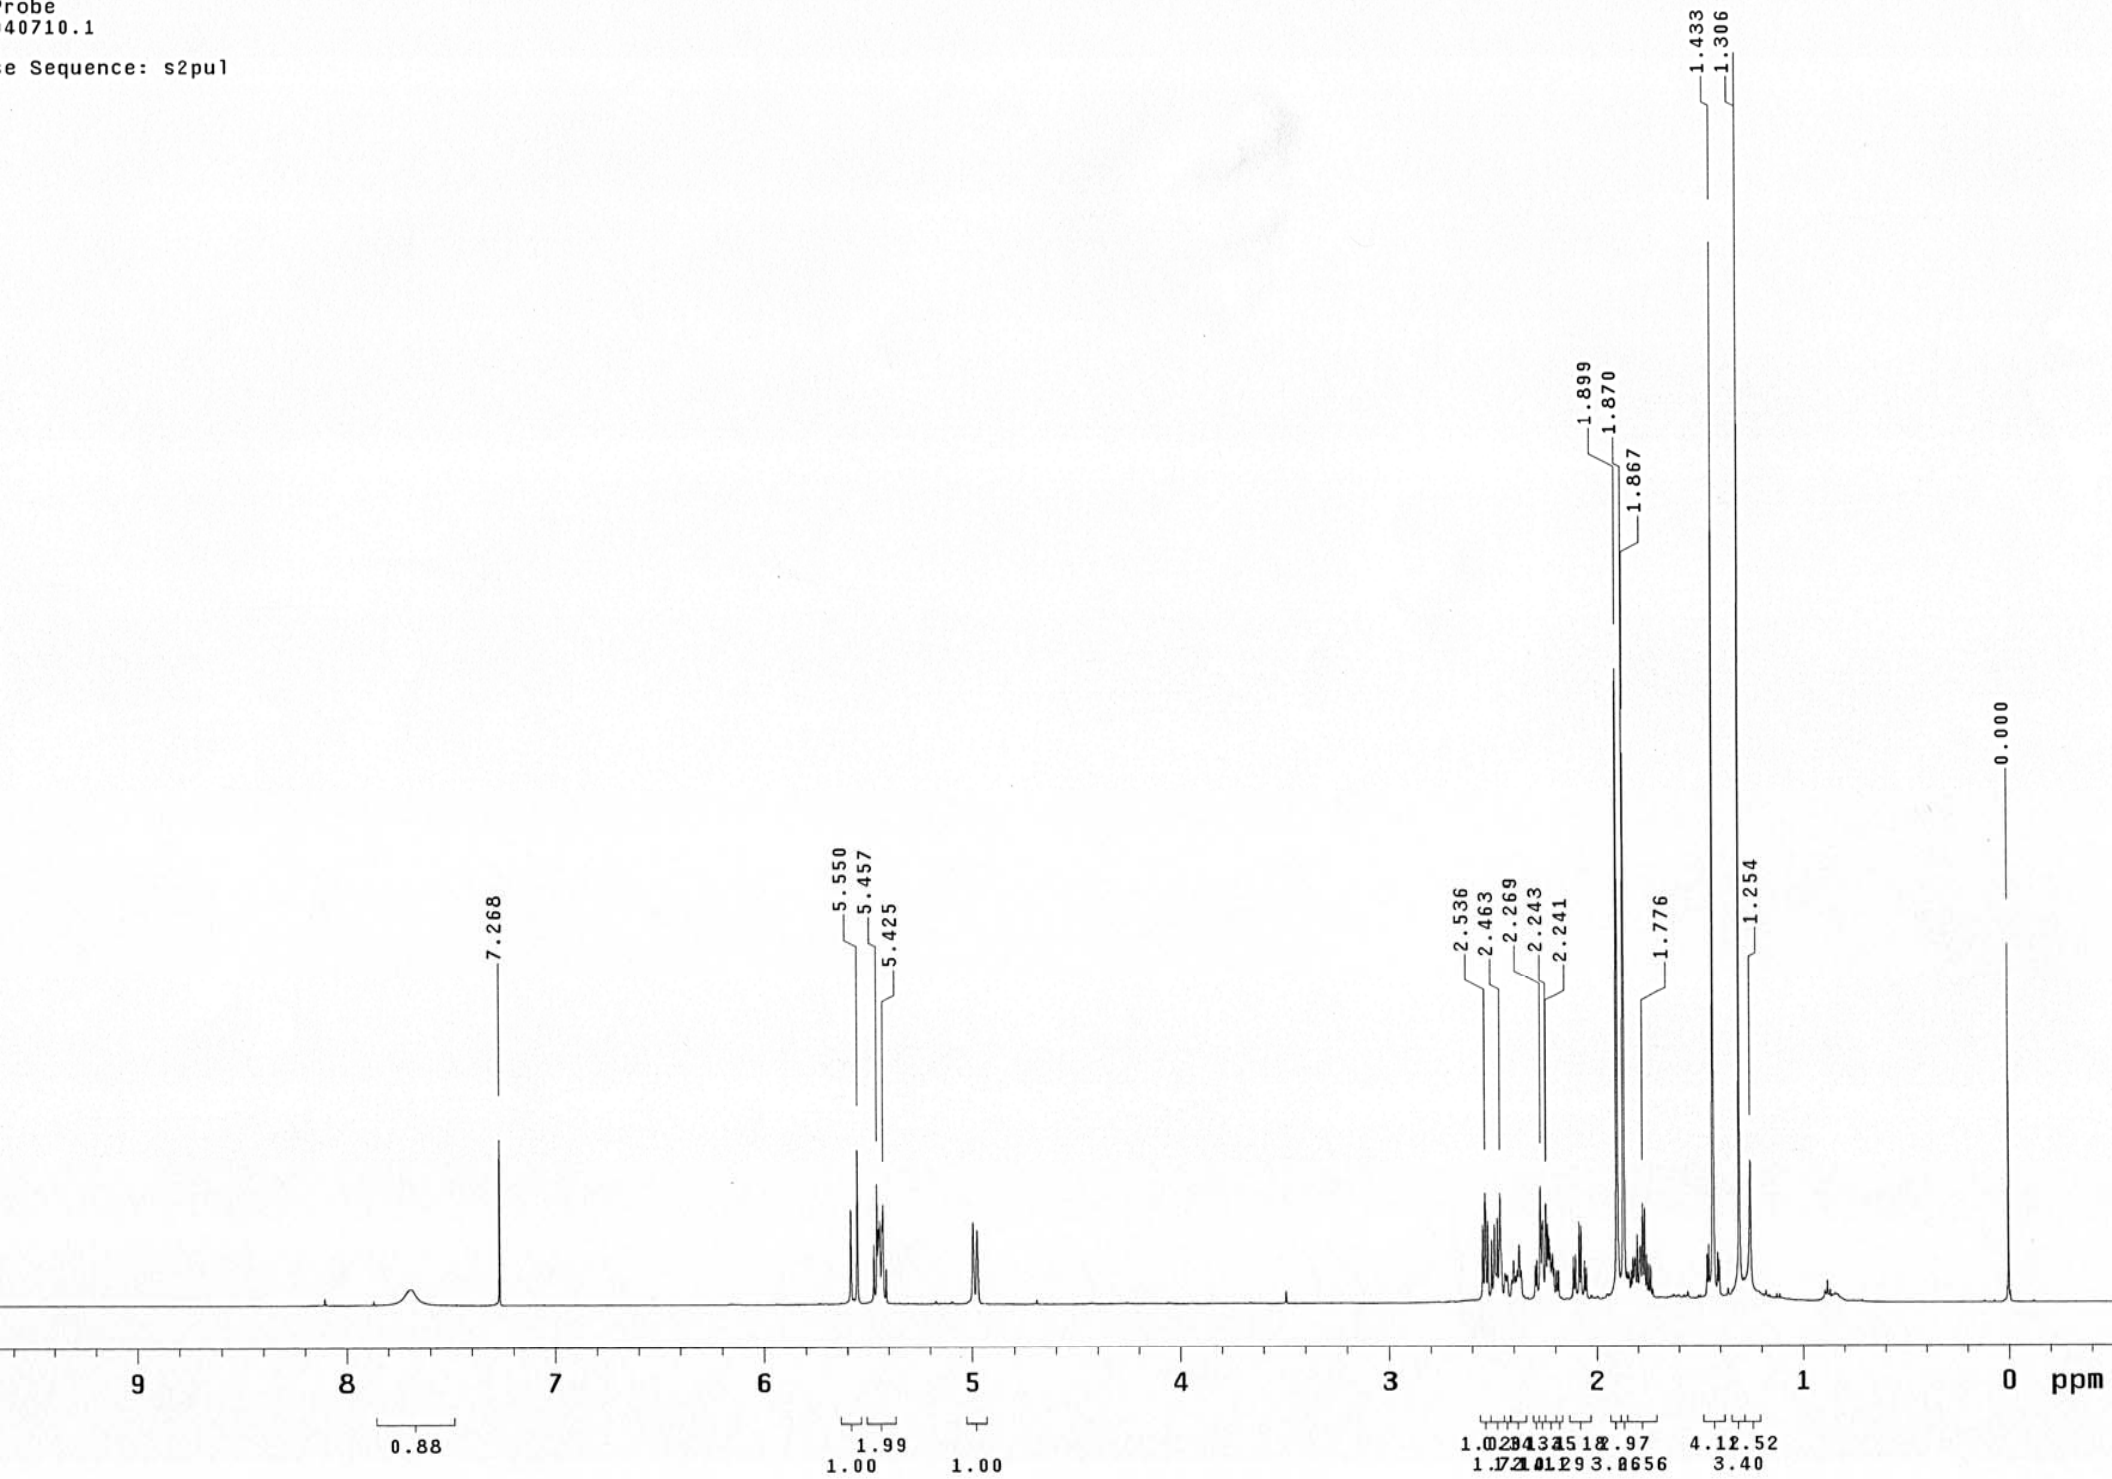

Re-3-55-8  
in CDCl3  
SW Probe  
mkh040710.1

Pulse Sequence: s2pu1

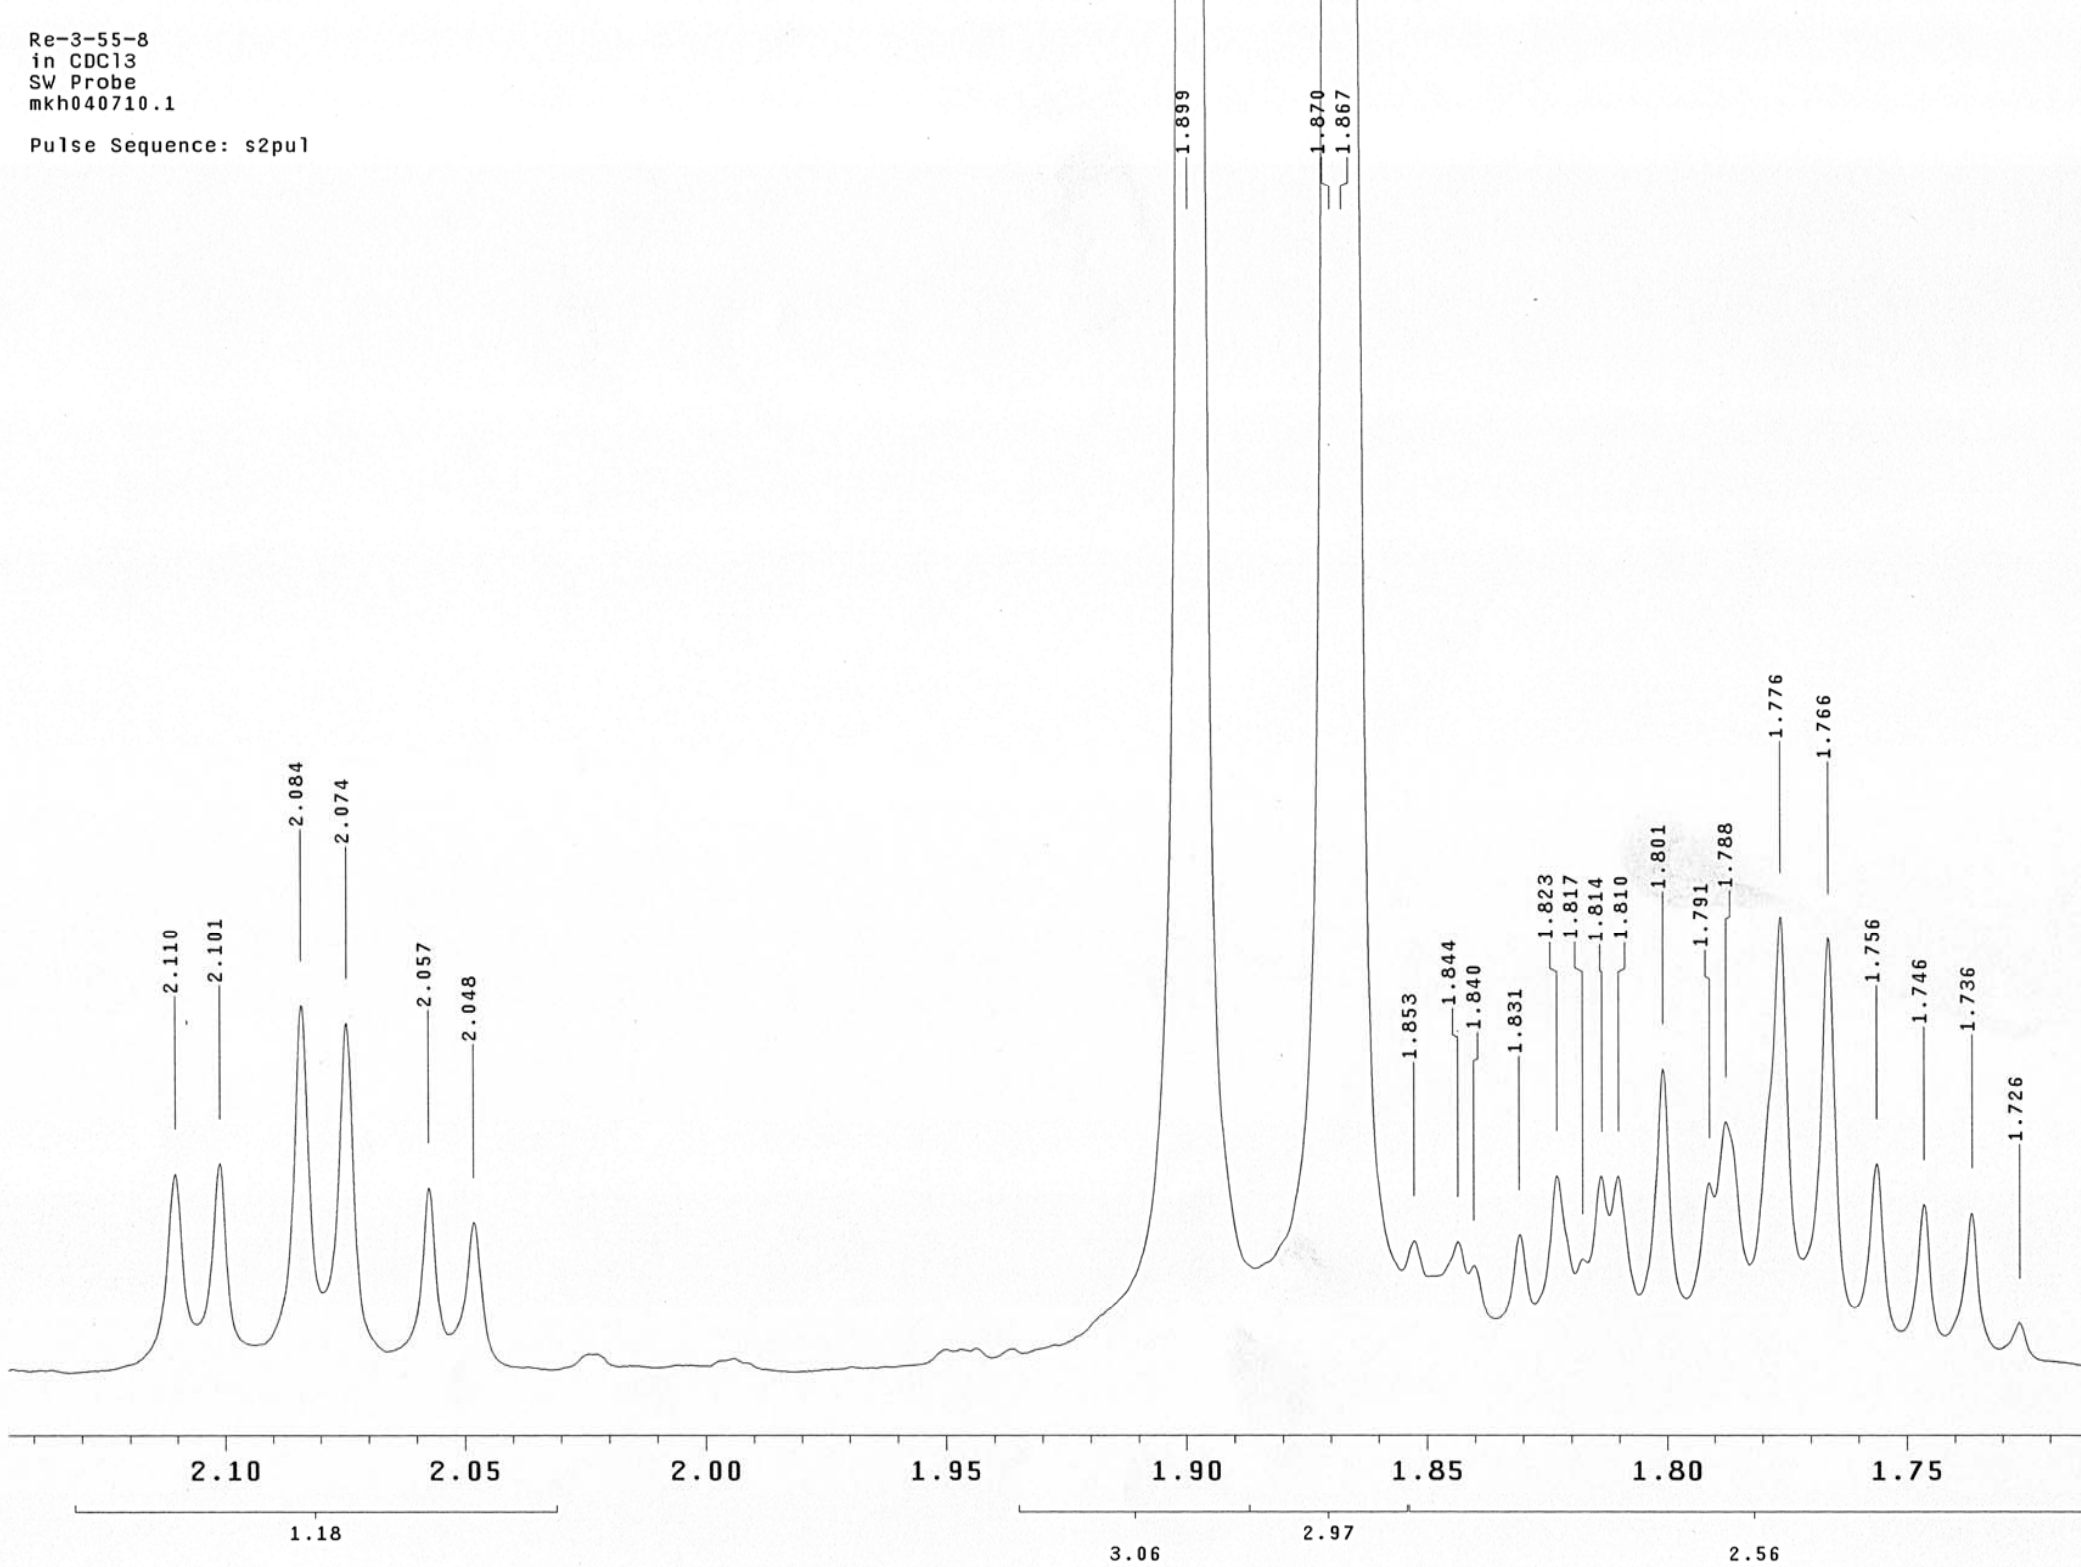

Re-3-55-8  
in CDC13  
SW Probe  
mkh040710.1

Pulse Sequence: s2pu1

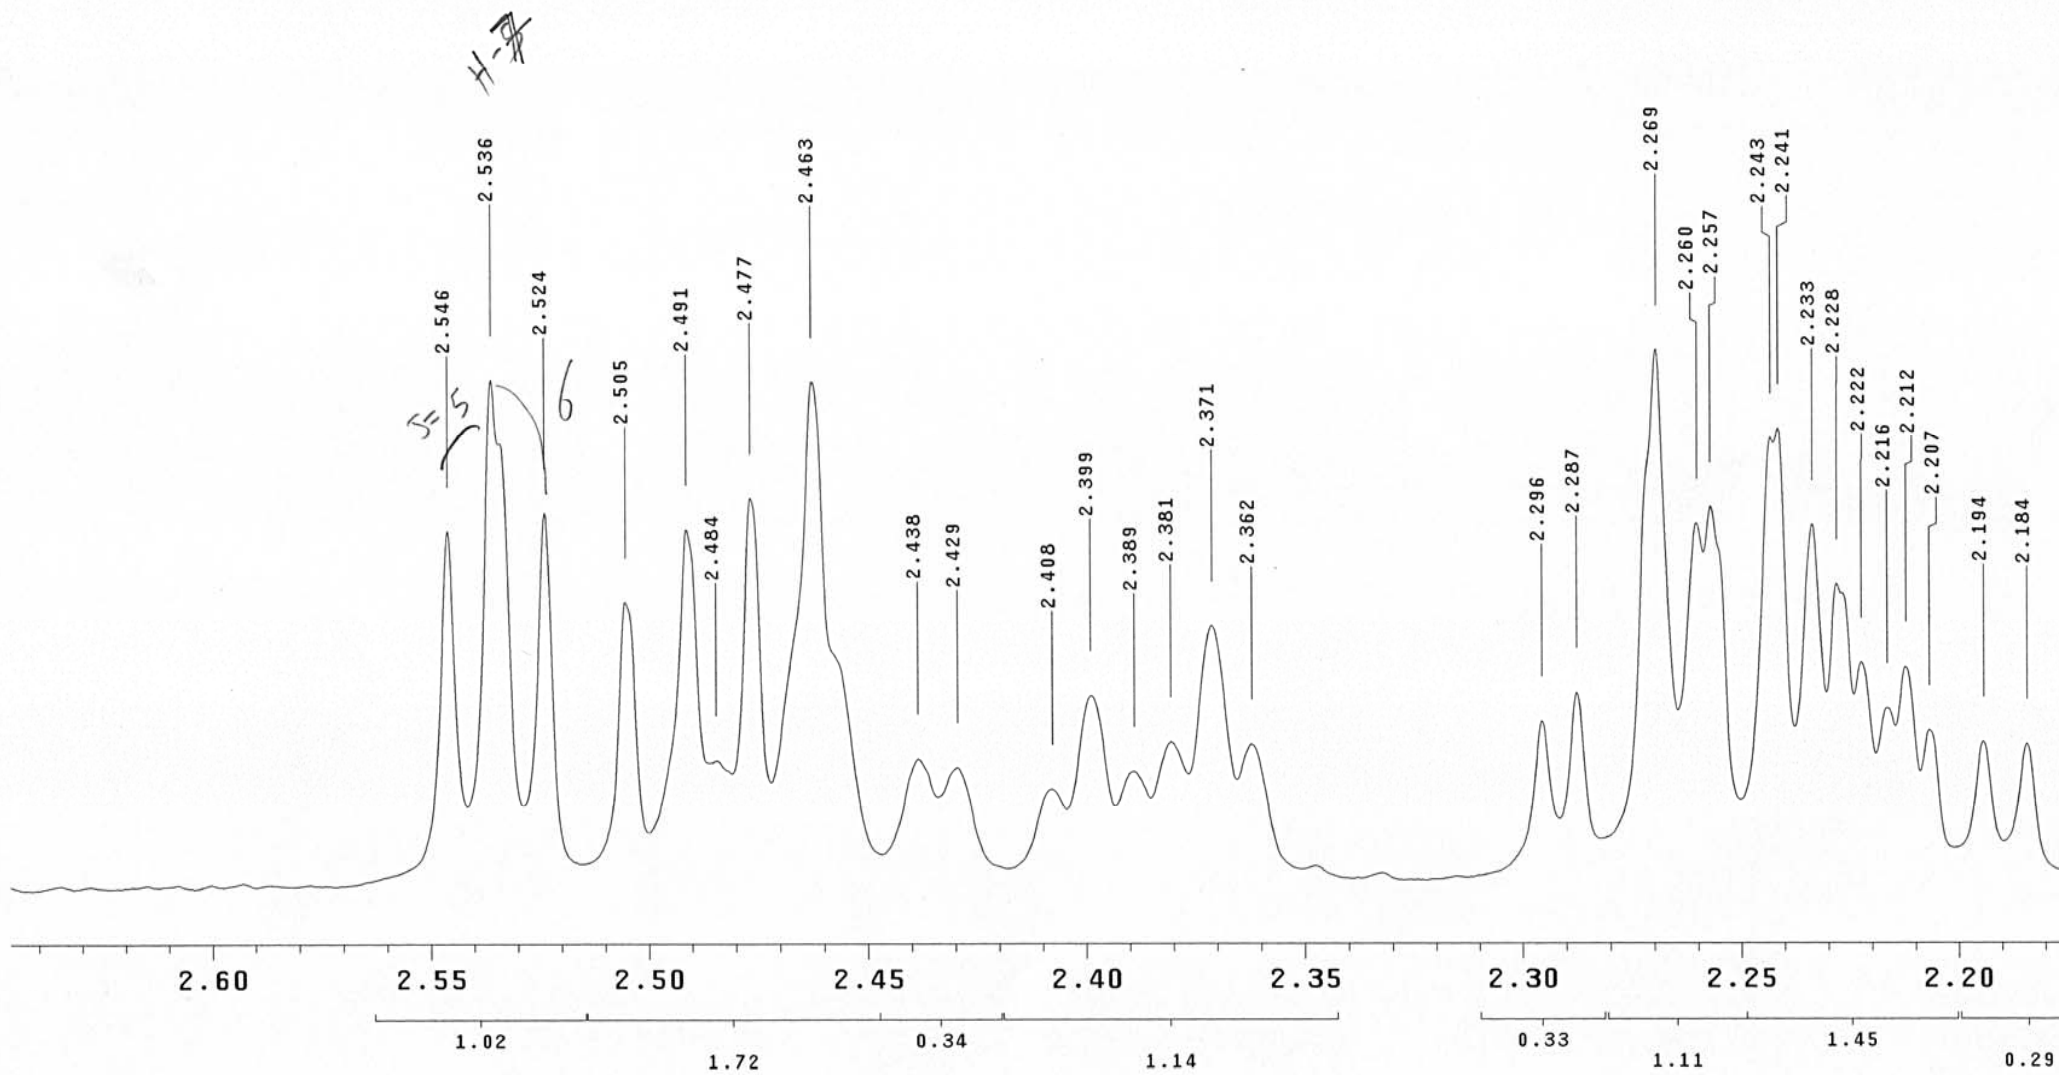



-3-55-8  
CDG13  
Probe  
h040710.1

1se Sequence: s2pu1

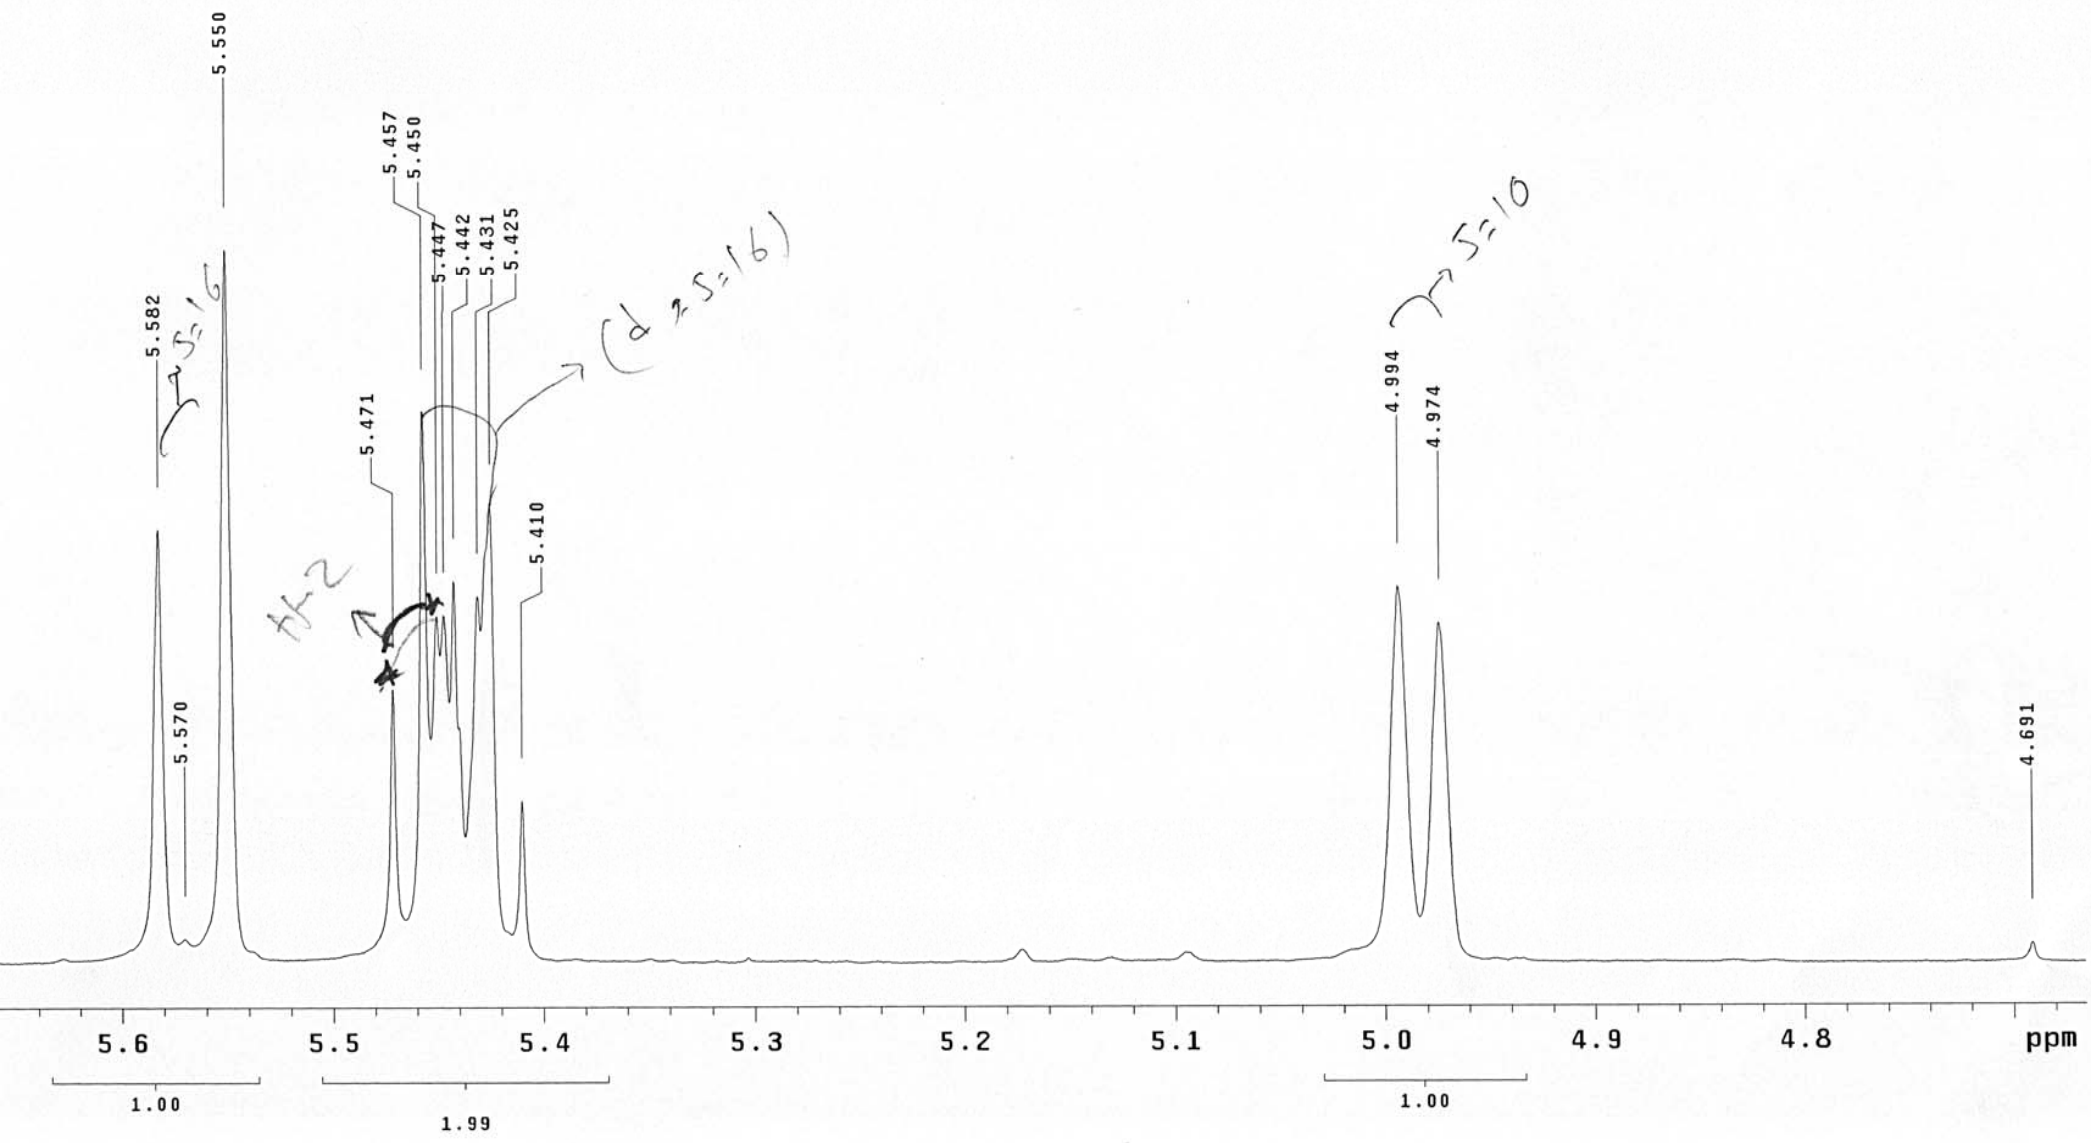

Pulse Sequence: s2pu1

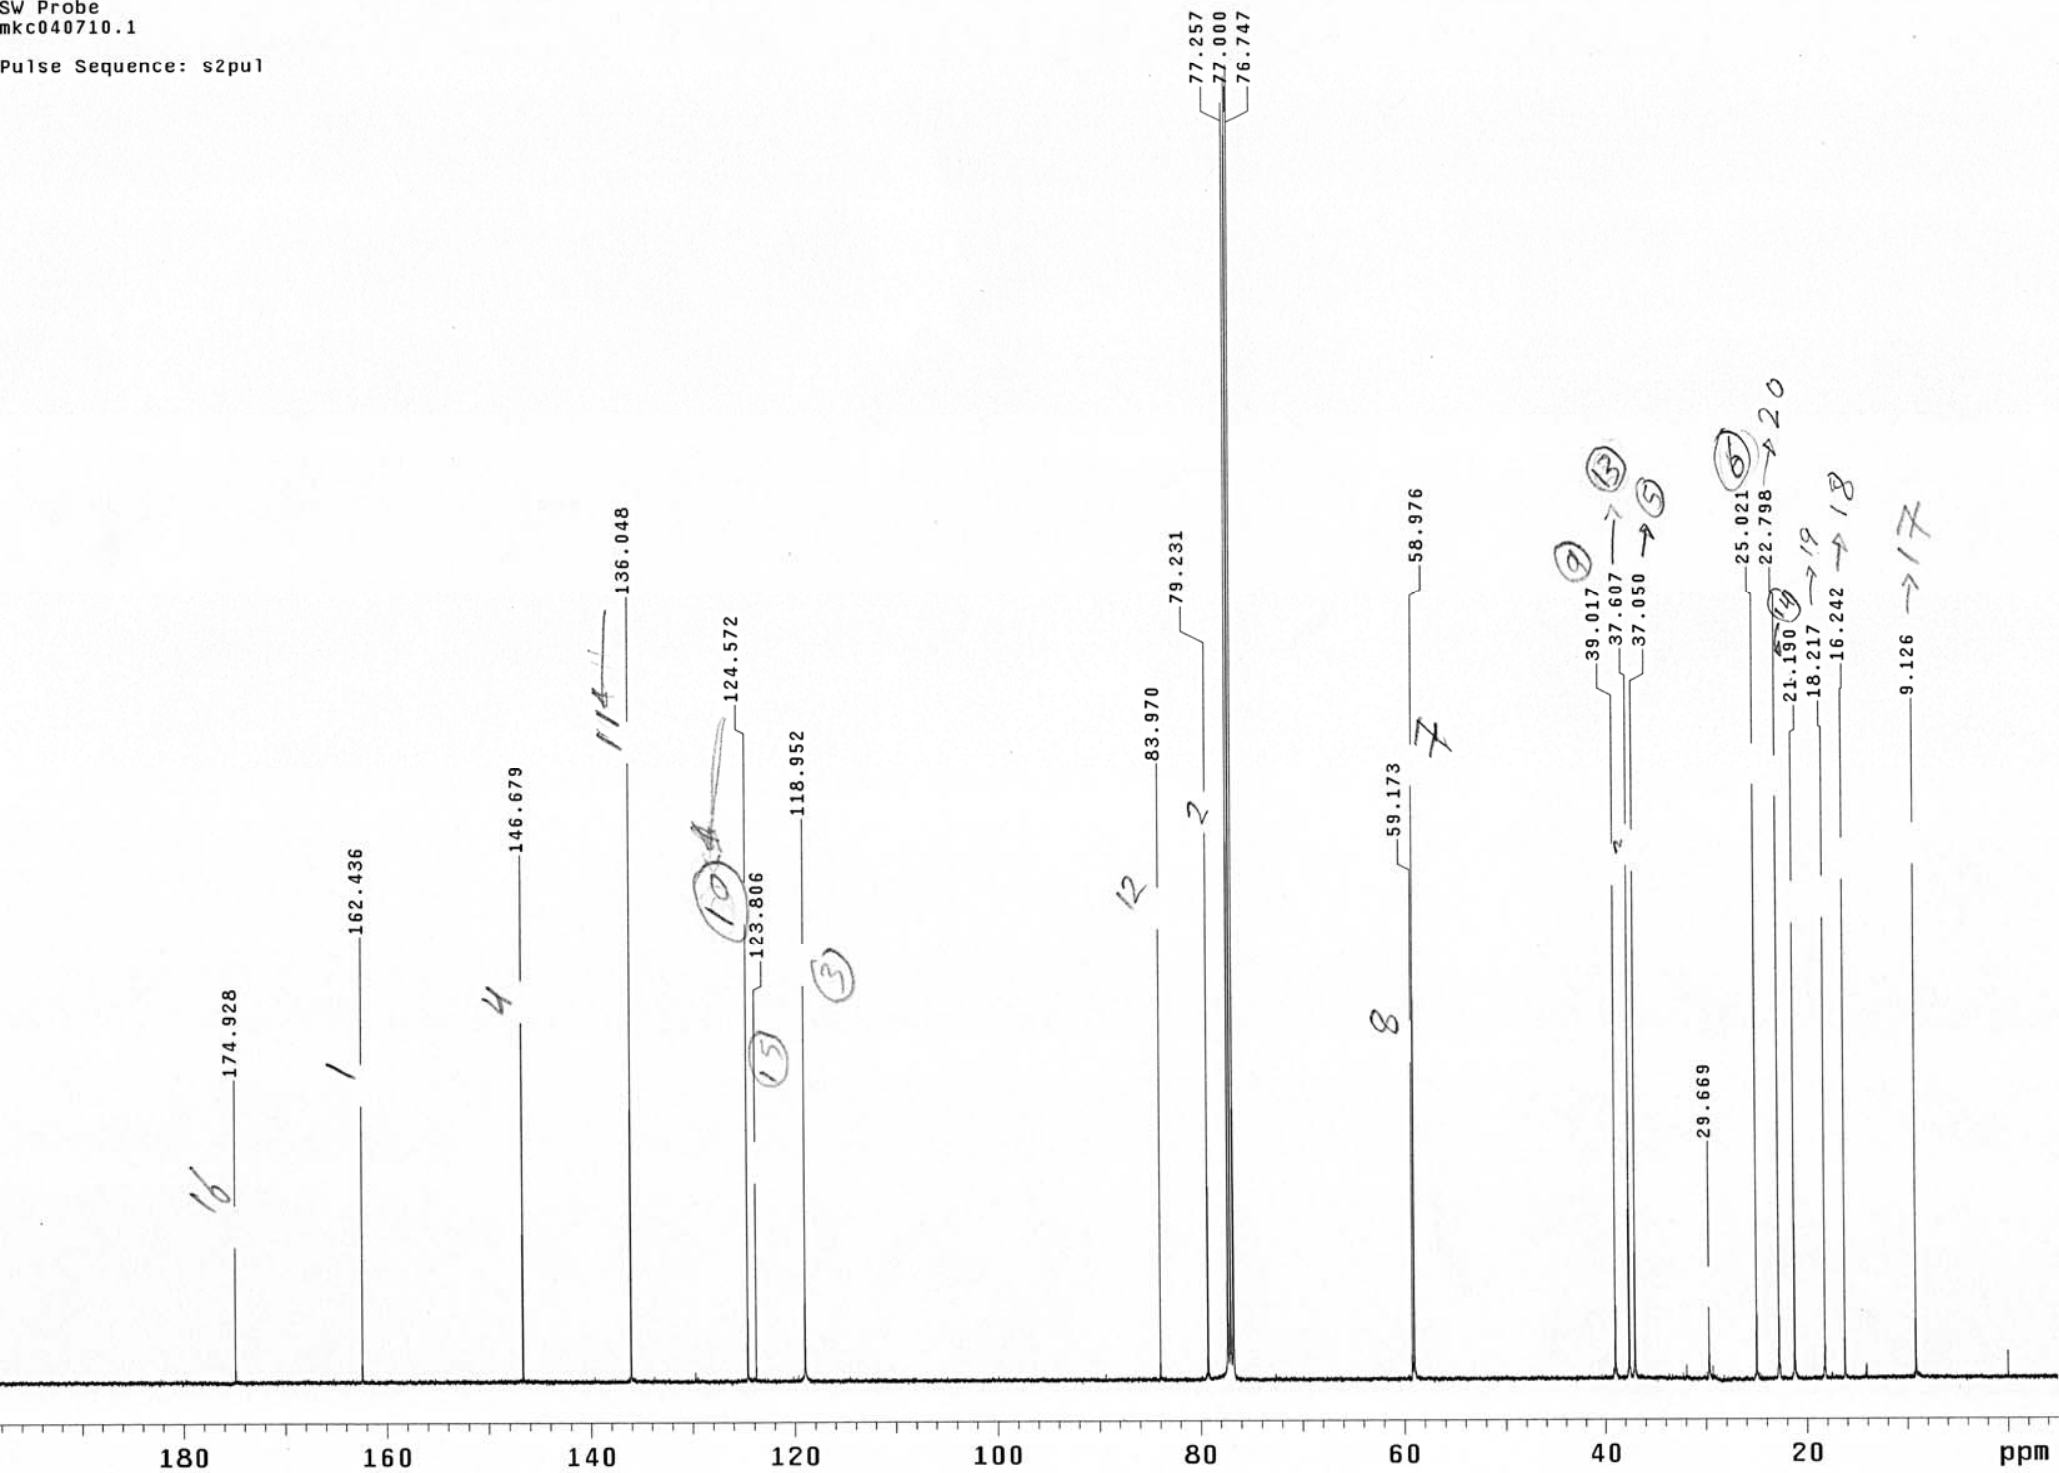

Re-3-55-8  
in CDCl3  
SW Probe  
mkc040710.1

Pulse Sequence: s2pu1

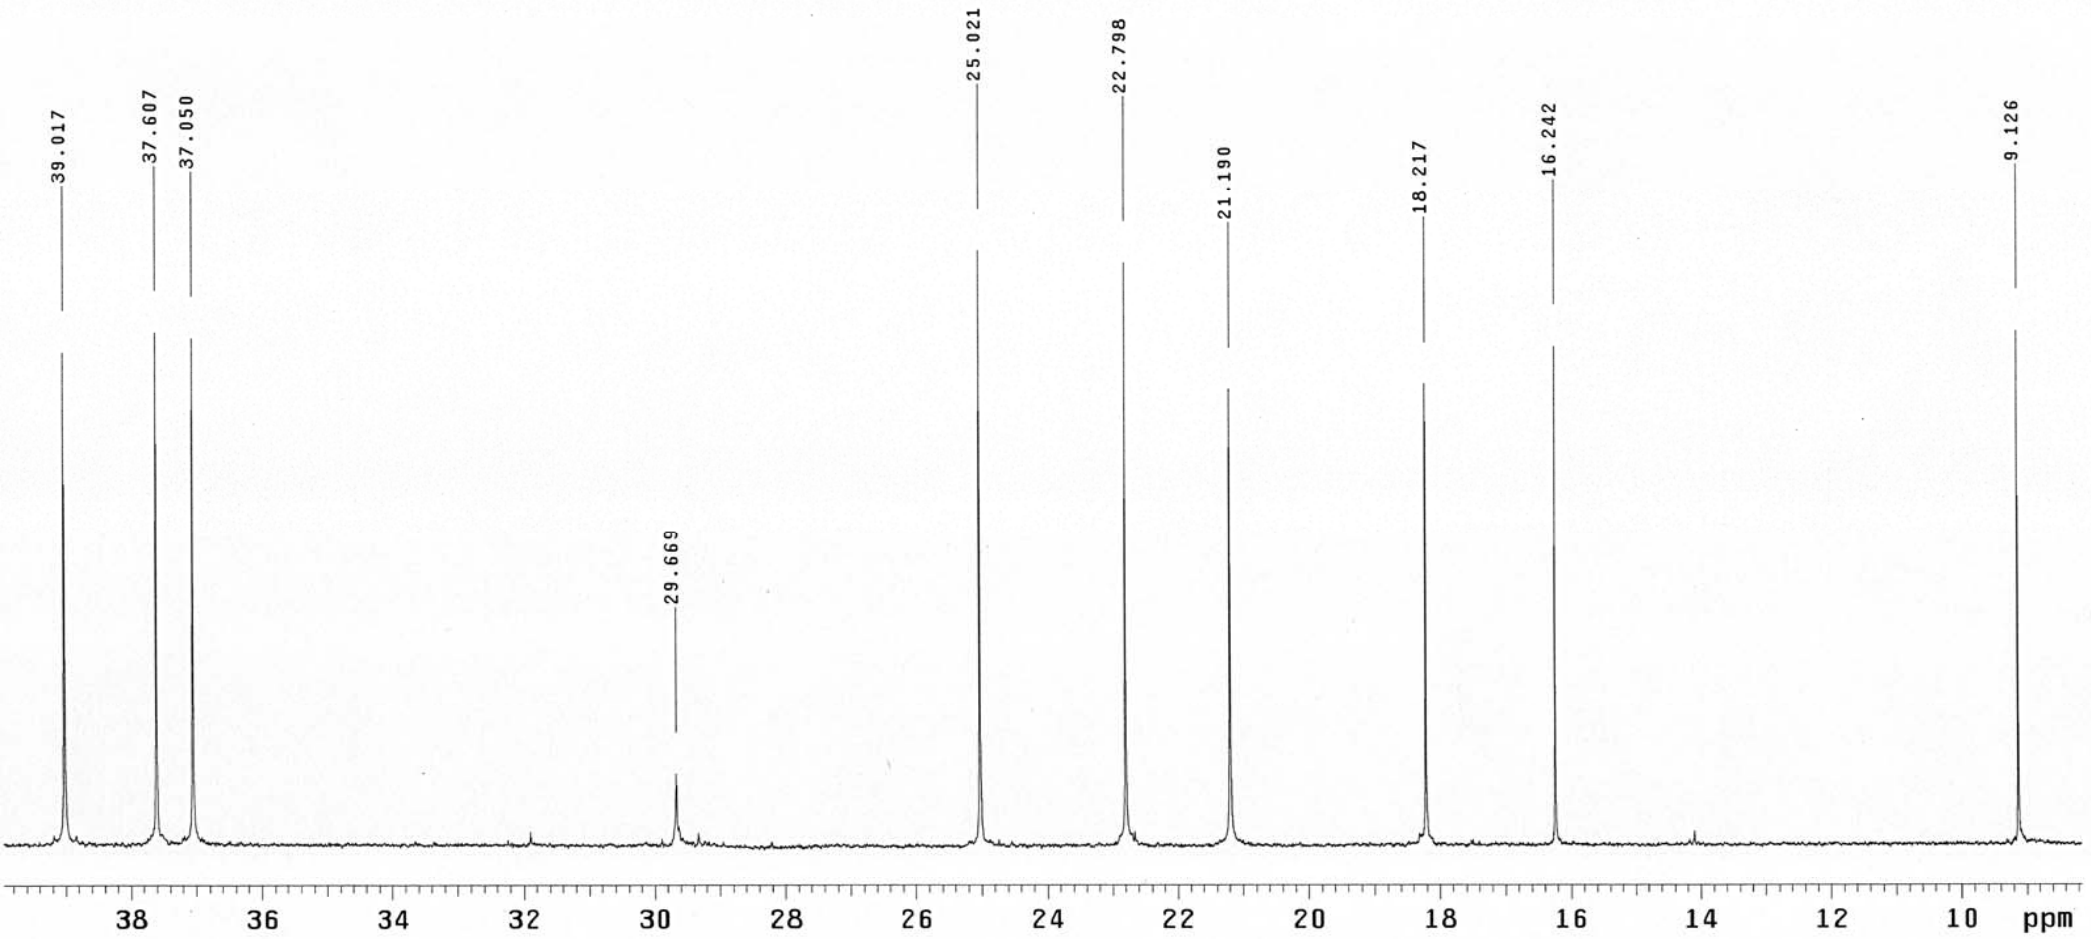

Re-3-55-8  
Gradient COSY  
in CDCl3  
SW Probe  
mkgcosy040710.1

Pulse Sequence: gCOSY

Solvent: CDCl3  
Temp. 23.0 C / 296.1 K  
INOVA-500 "inova500a"

Relax. delay 1.000 sec  
Acq. time 0.818 sec  
Width 5006.3 Hz  
2D Width 5006.3 Hz  
2 repetitions  
256 increments

OBSERVE H1, 499.7081720 MHz

DATA PROCESSING

Sq. sine bell 0.102 sec

F1 DATA PROCESSING

Sq. sine bell 0.026 sec

FT size 8192 x 8192

Total time 16 min, 19 sec

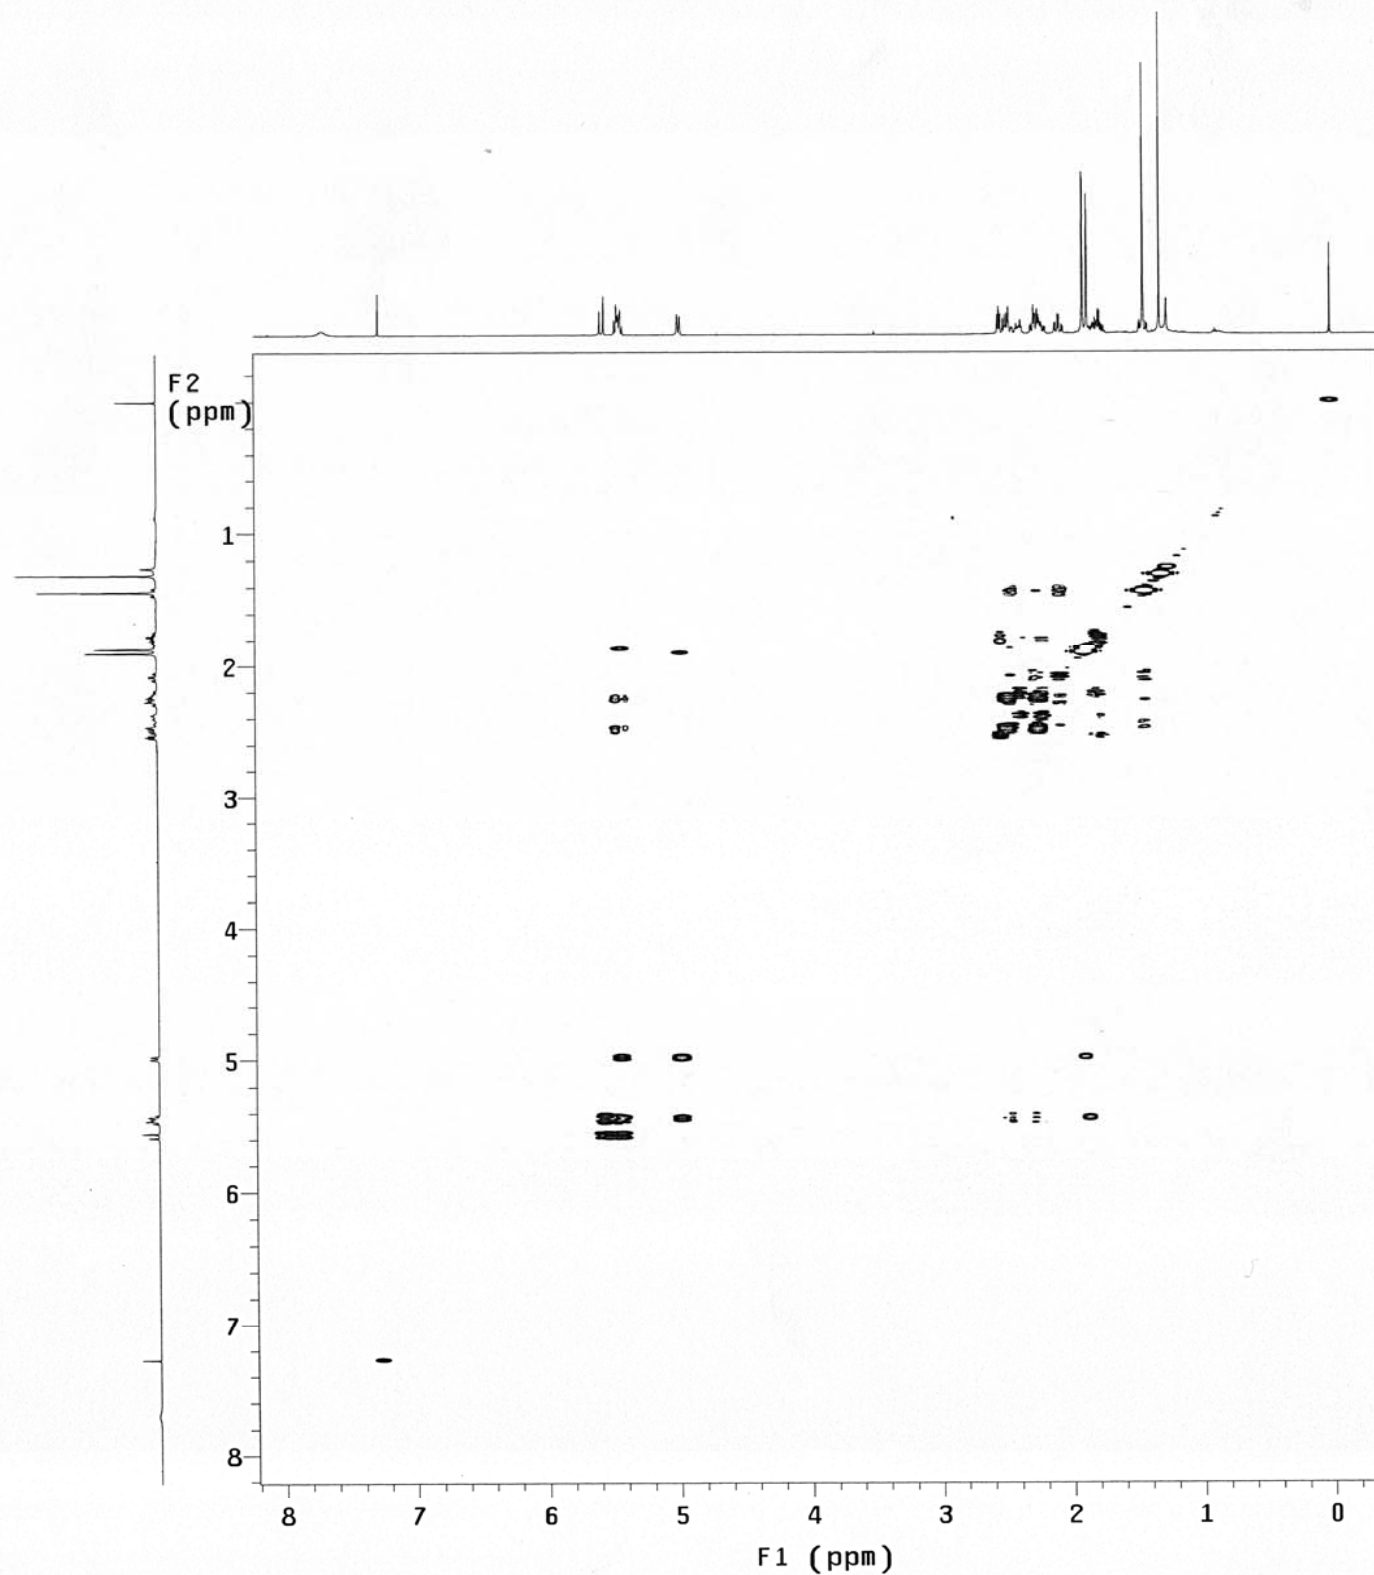

Re-3-55-8  
Gradient HSQC  
all peaks  
in CDCl3  
SW Probe  
mkghsqc040710.1

Pulse Sequence: gHSQC

Solvent: CDCl3  
Temp. 23.0 C / 296.1 K  
User: 1-14-87  
INOVA-500 "inova500a"

Relax. delay 1.000 sec  
Acq. time 0.205 sec  
Width 5006.3 Hz  
2D Width 21361.8 Hz  
24 repetitions  
2 x 128 increments  
OBSERVE H1, 499.7081720 MHz  
DECOUPLE C13, 125.6611136 MHz  
Power 43 dB  
on during acquisition  
off during delay  
GARP-1 modulated  
DATA PROCESSING  
Gauss apodization 0.094 sec  
F1 DATA PROCESSING  
Gauss apodization 0.011 sec  
FT size 2048 x 2048  
Total time 2 hr, 11 min, 20 sec

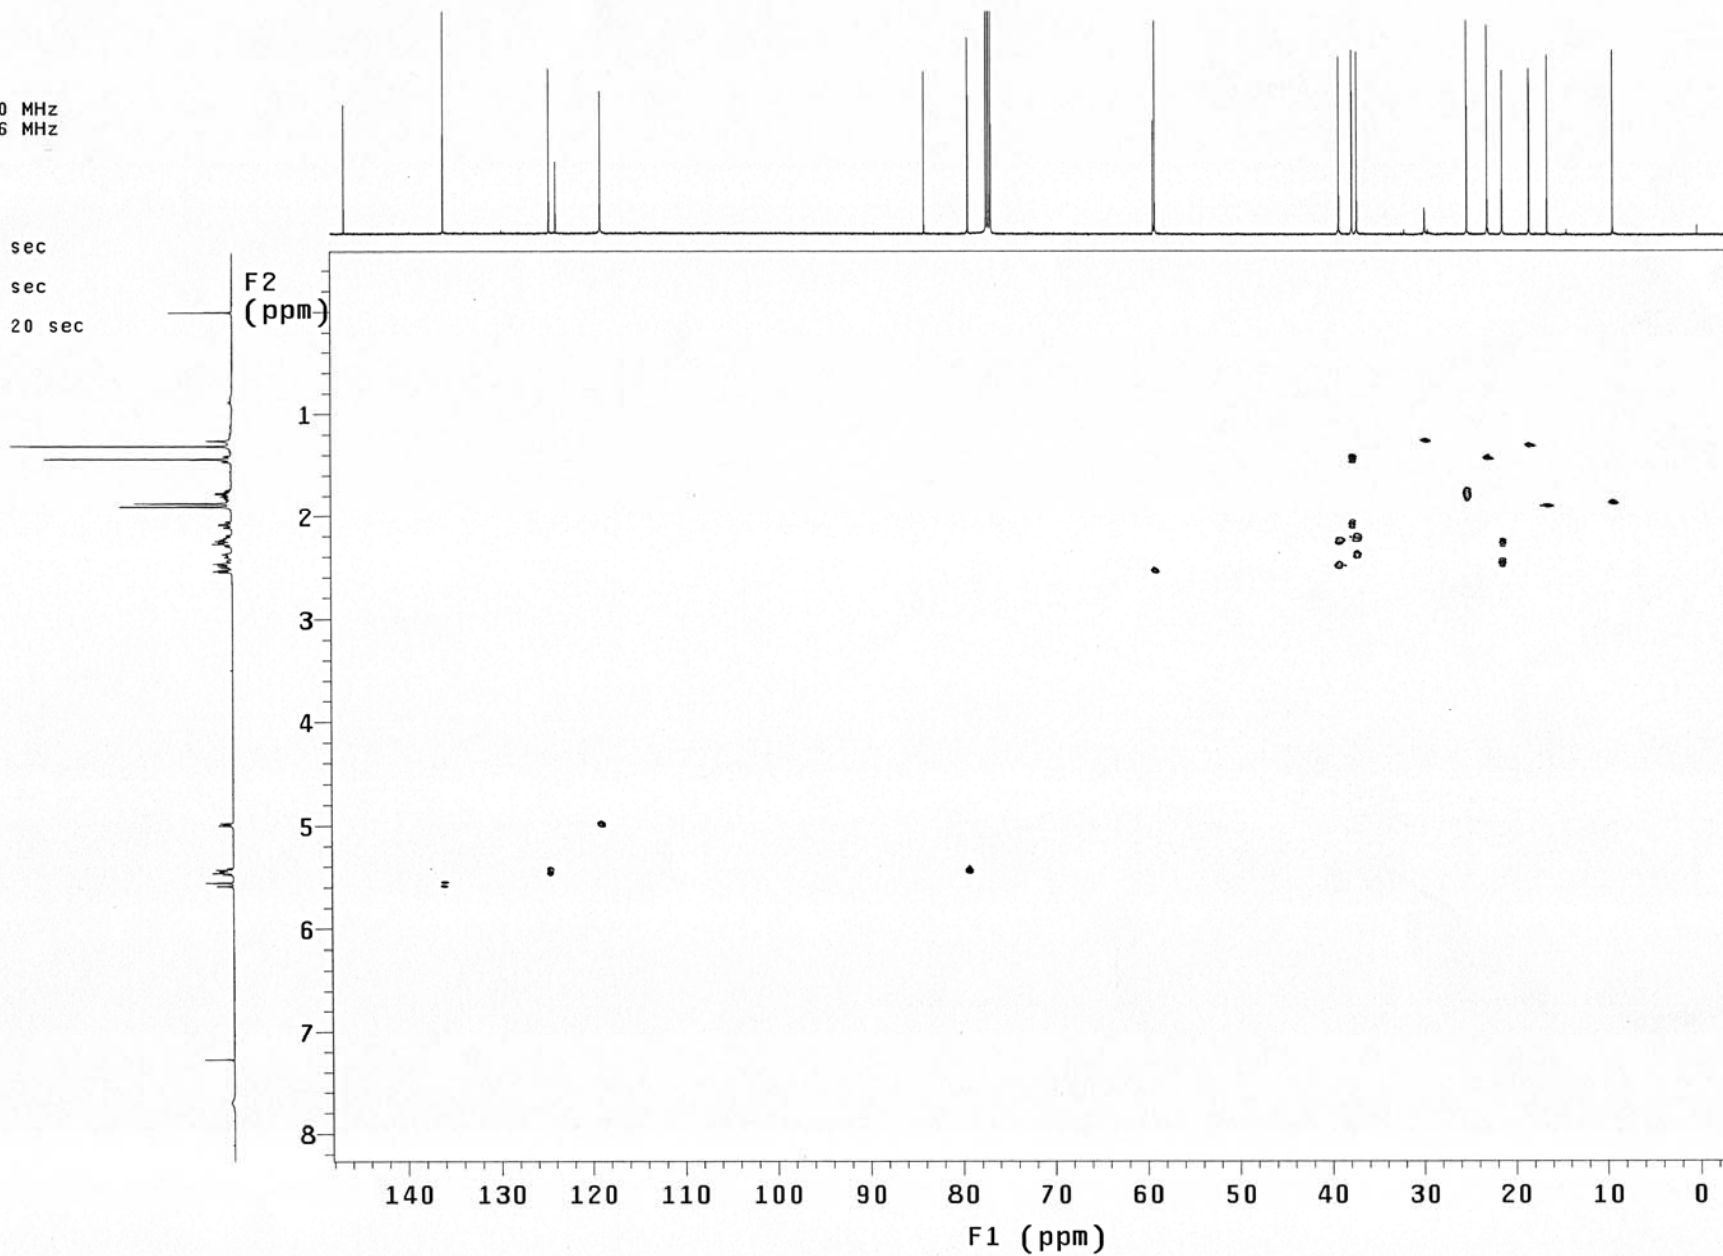

Re-3-55-8  
Gradient HSQC  
CH2 peaks only  
in CDC13  
SW Probe  
mkghsqc040710.1

Pulse Sequence: gHSQC

Solvent: CDC13  
Temp. 23.0 C / 296.1 K  
User: 1-14-87  
INOVA-500 "inova500a"

Relax. delay 1.000 sec  
Acq. time 0.205 sec  
Width 5006.3 Hz  
2D Width 21361.8 Hz  
24 repetitions  
2 x 128 increments  
OBSERVE H1, 499.7081720 MHz  
DECOUPLE C13, 125.6611136 MHz  
Power 43 dB  
on during acquisition  
off during delay  
GARP-1 modulated  
DATA PROCESSING  
Gauss apodization 0.094 sec  
F1 DATA PROCESSING  
Gauss apodization 0.011 sec  
FT size 2048 x 2048  
Total time 2 hr, 11 min, 20 sec

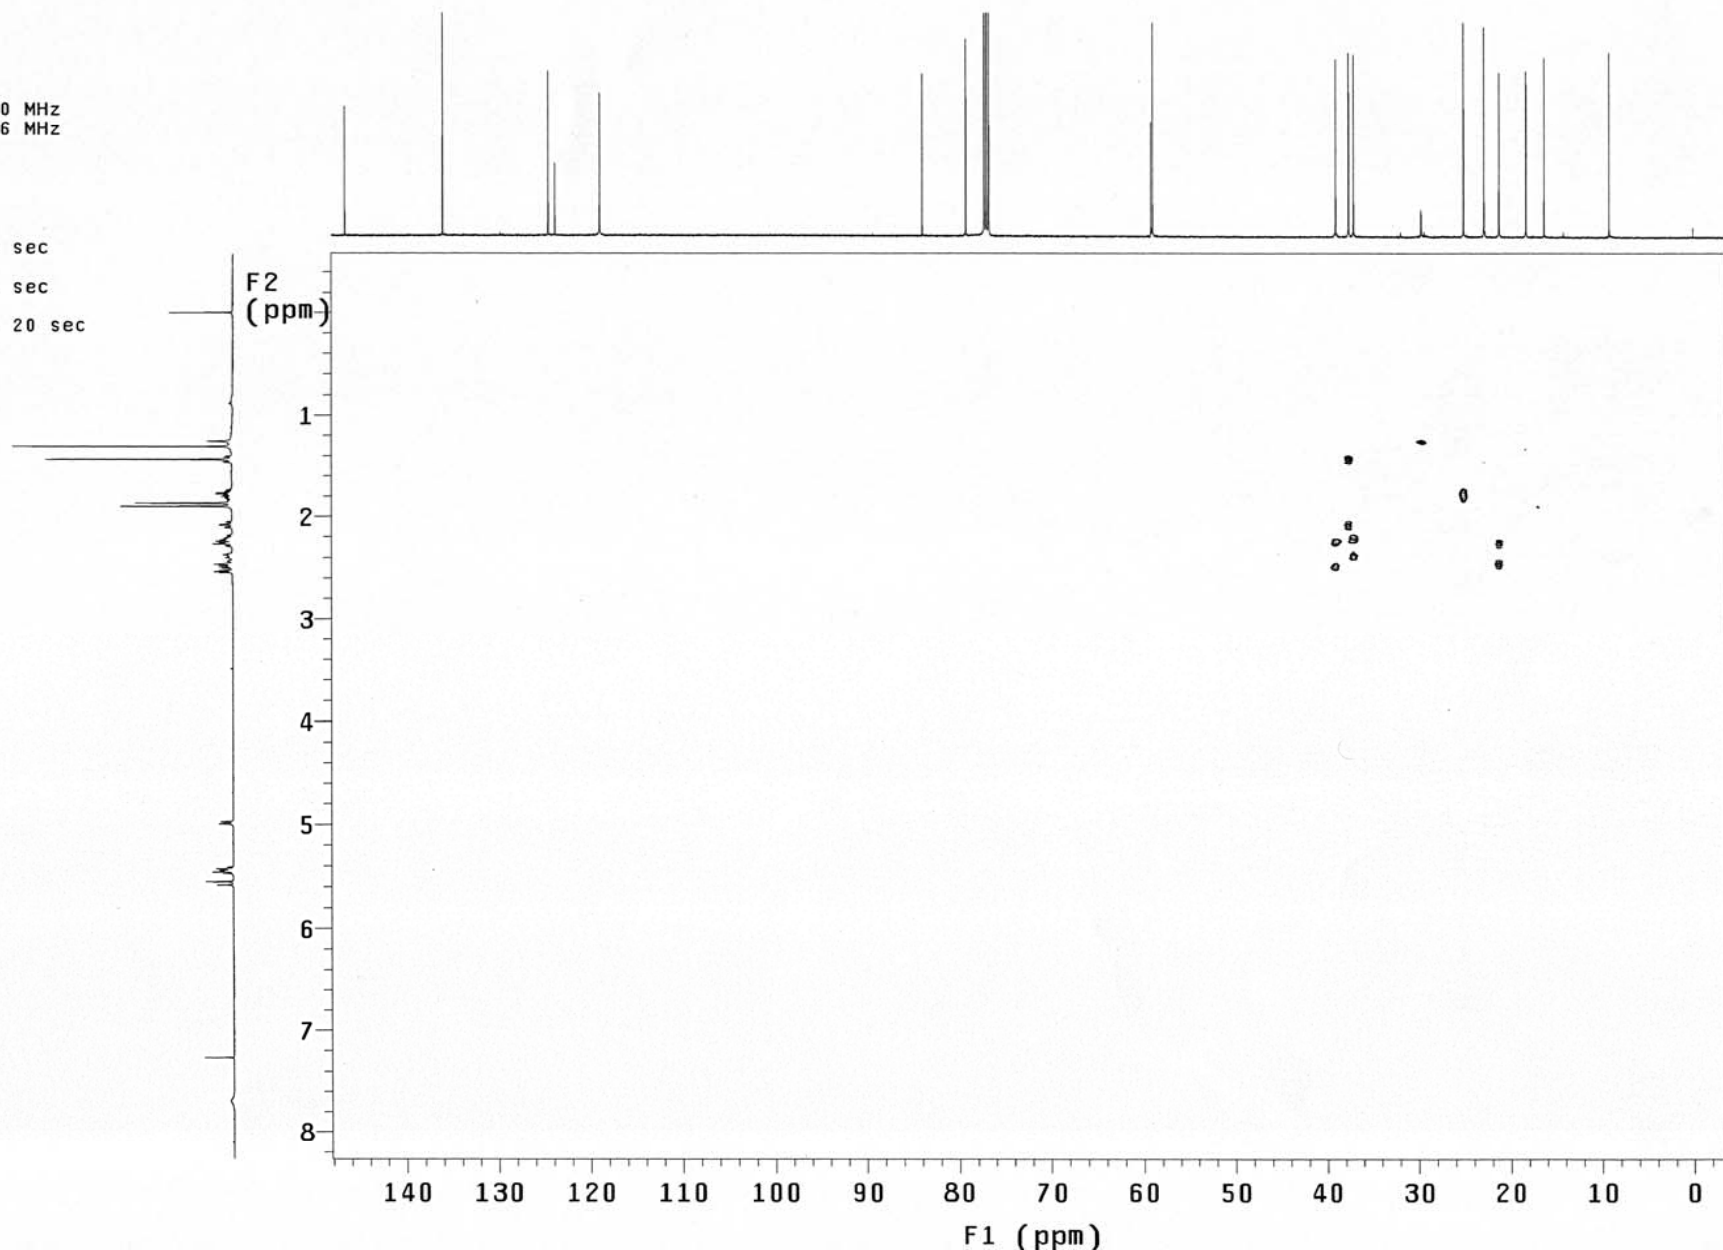

2  
OC13  
obe  
22310.1  
Sequence: s2pu1

7.262

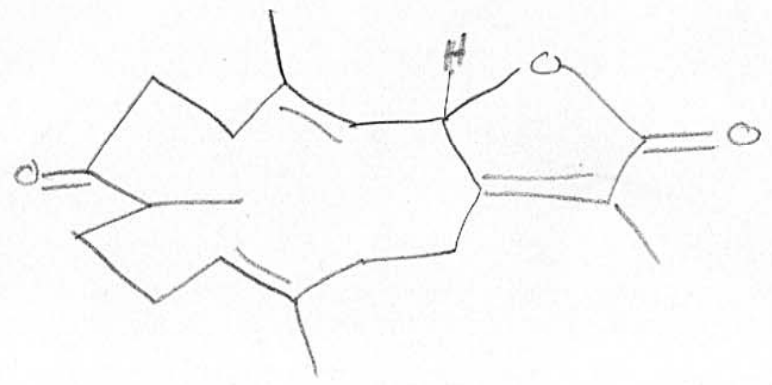

1.841  
1.826  
1.823  
1.819  
1.605  
1.588  
1.583  
1.569  
1.565  
1.561  
1.555  
1.255  
1.062  
1.047

2.742  
2.737  
2.660

0.881

0.007  
-0.007

0.000

9 8 7 6 5 4 3 2 1 0 ppm

0.97 1.00 0.95 0.42 2.03 0.00 0.38 1.14 3.30 9.49 1.58 8.03 0.09 1.19 2.52 98.01 1.69 9.68 1.49

Re-3-2  
in CDCl3  
SW Probe  
mkh022313  
Pulse Sequence: s2pu1

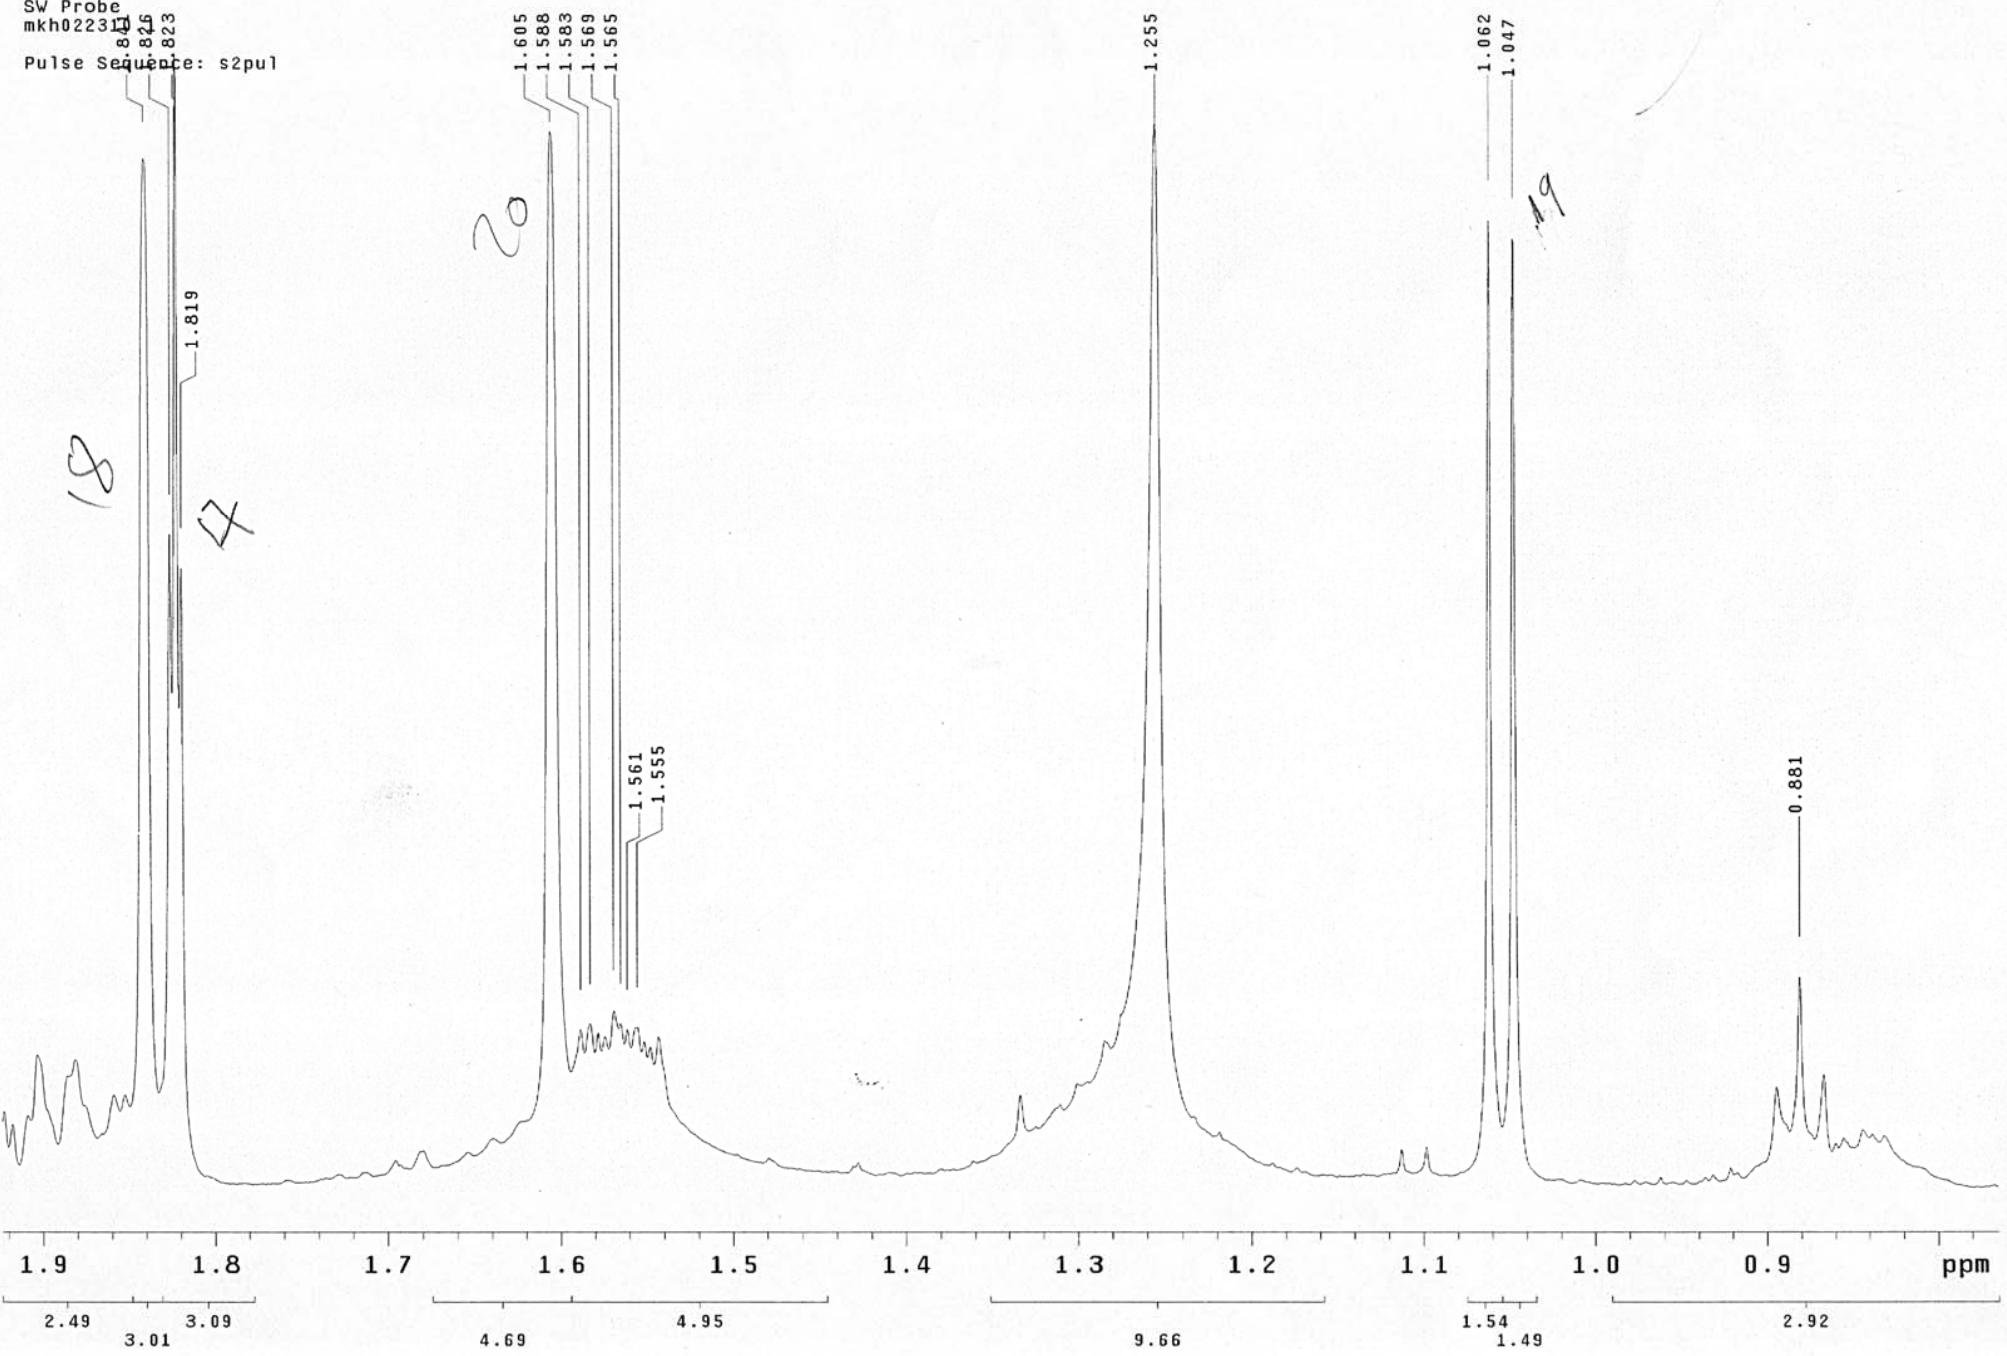



Re-3-2  
in CDC13  
SW Probe  
mkh022310.1

Pulse Sequence: s2pul

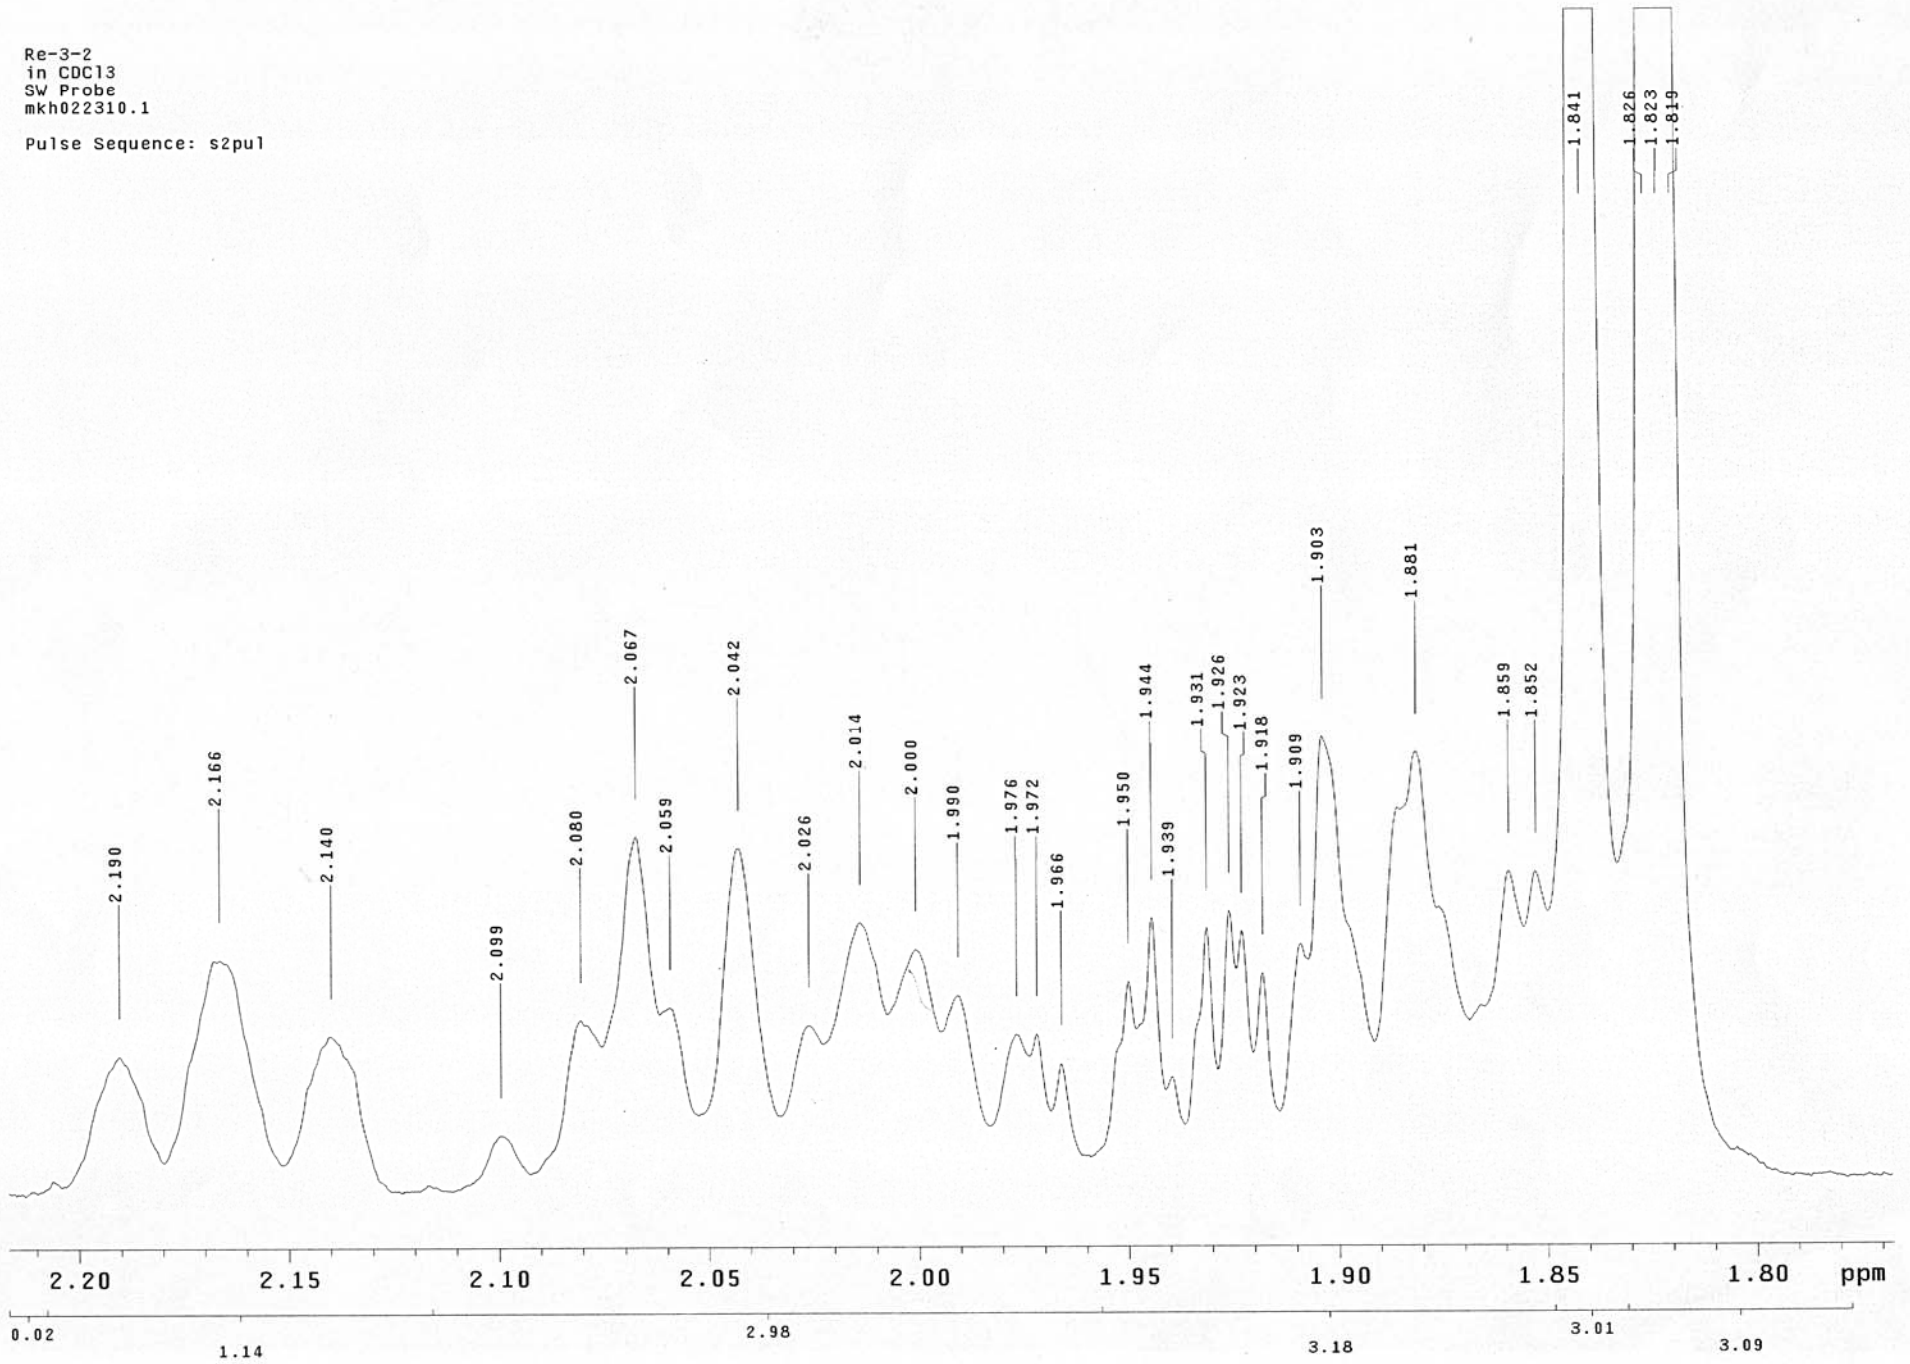

-2  
DC13  
probe  
22310.1  
e Sequence: s2pu1

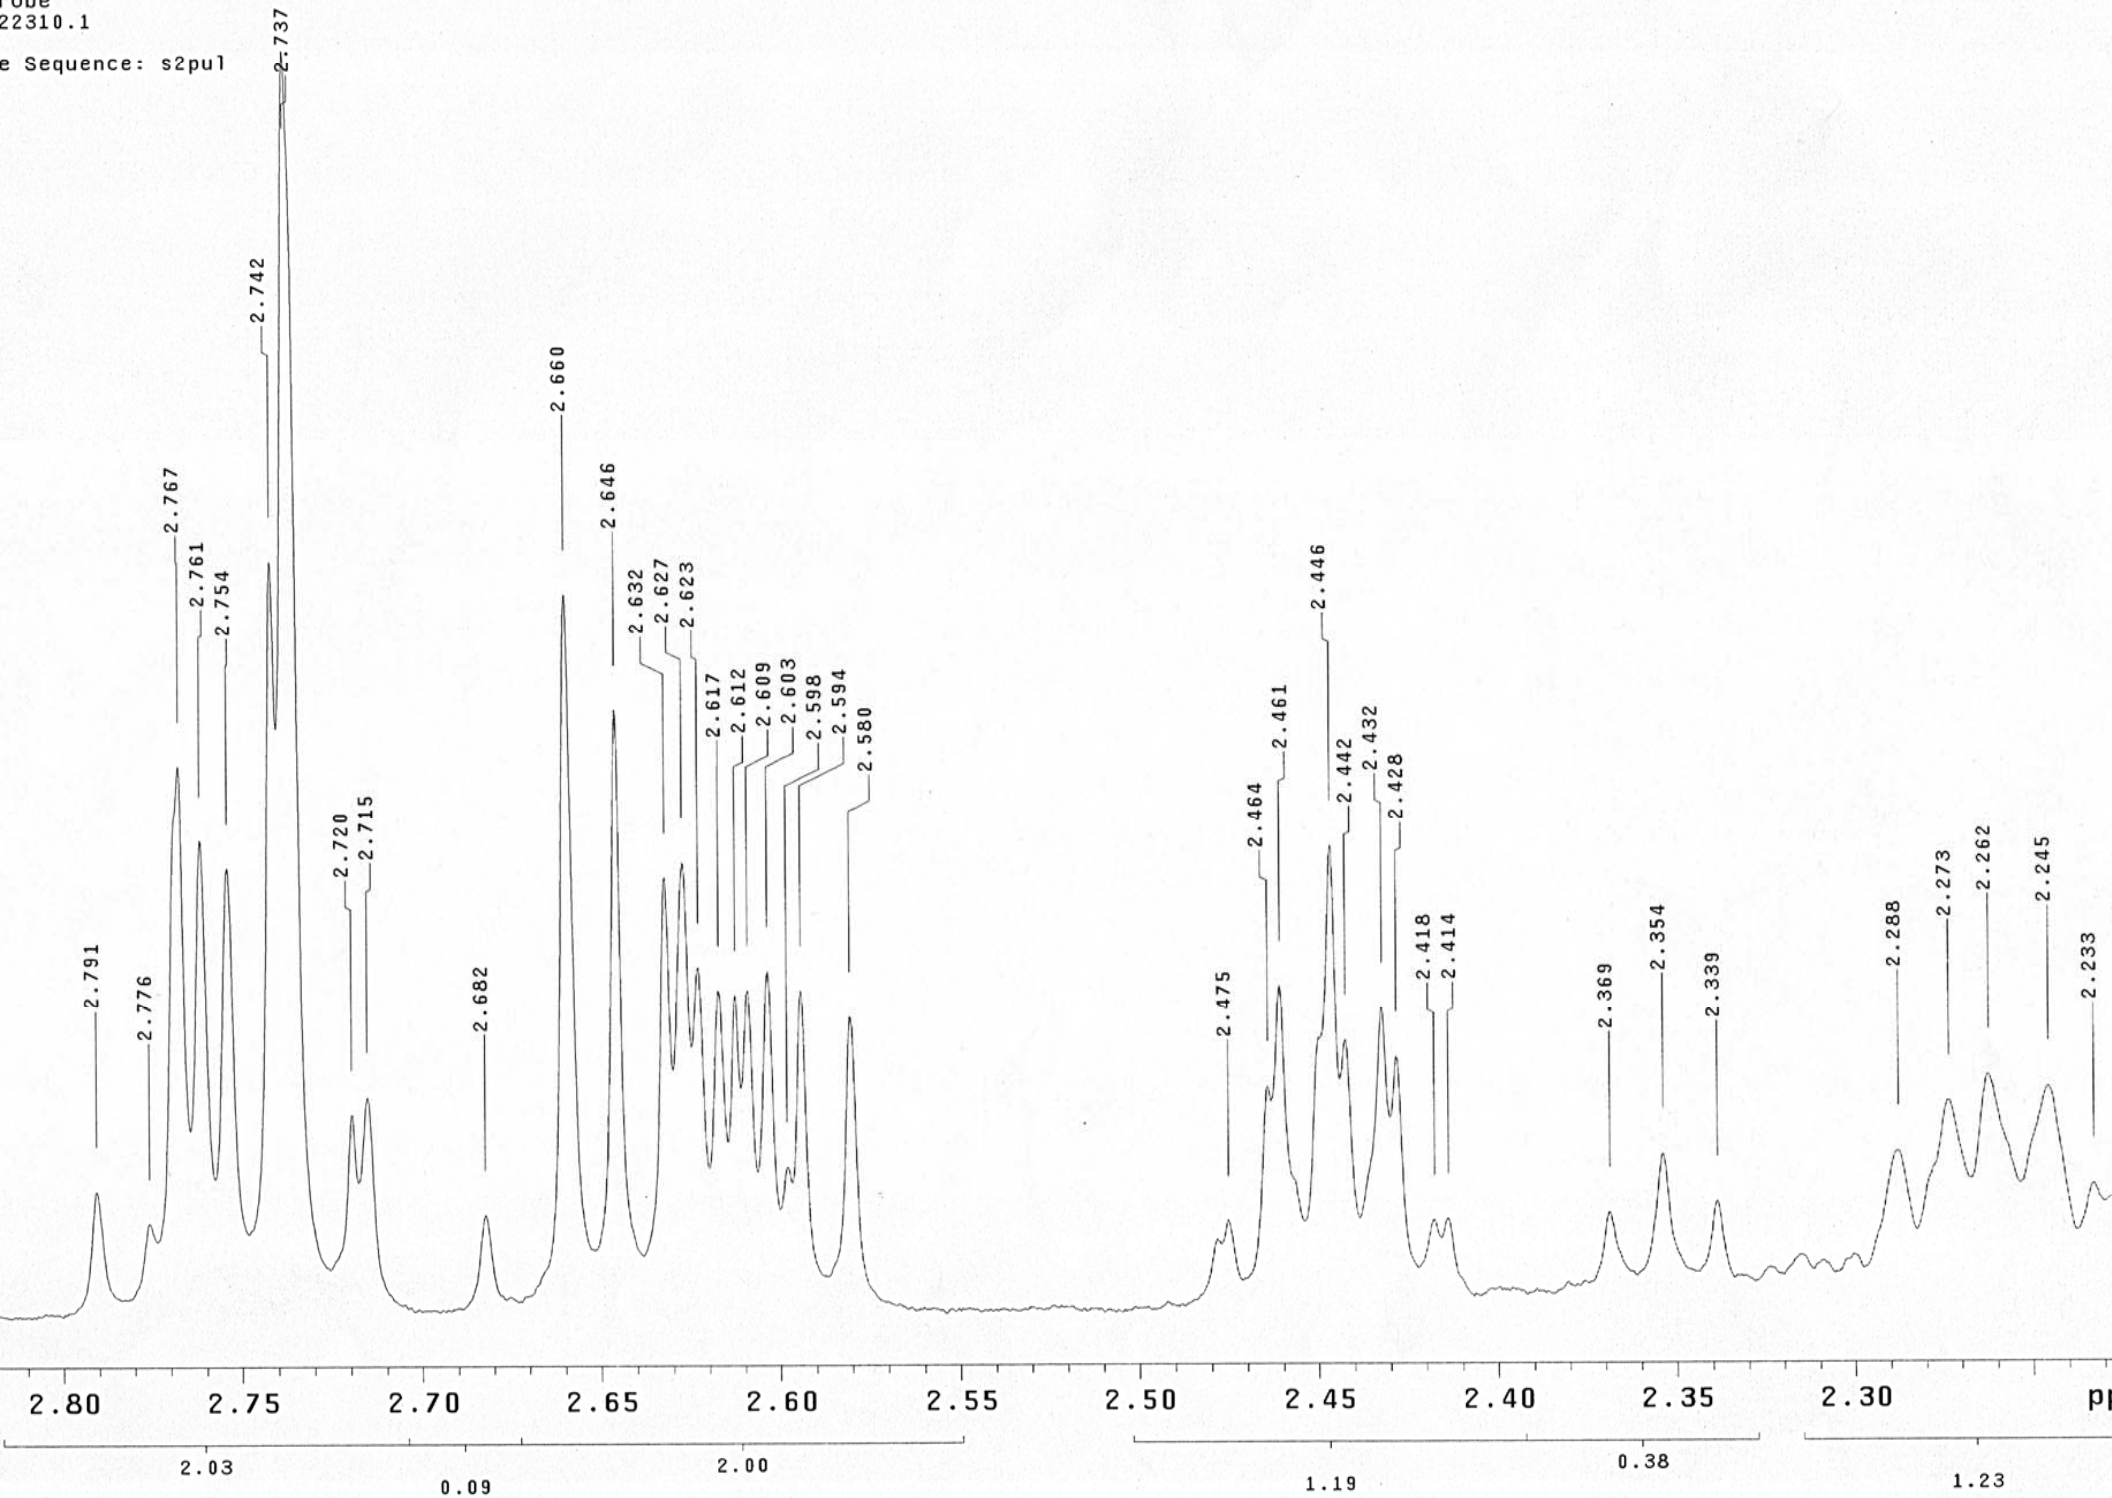

Re-3-2  
in CDC13  
SW Probe  
mkc022310.1

Pulse Sequence: s2pu1

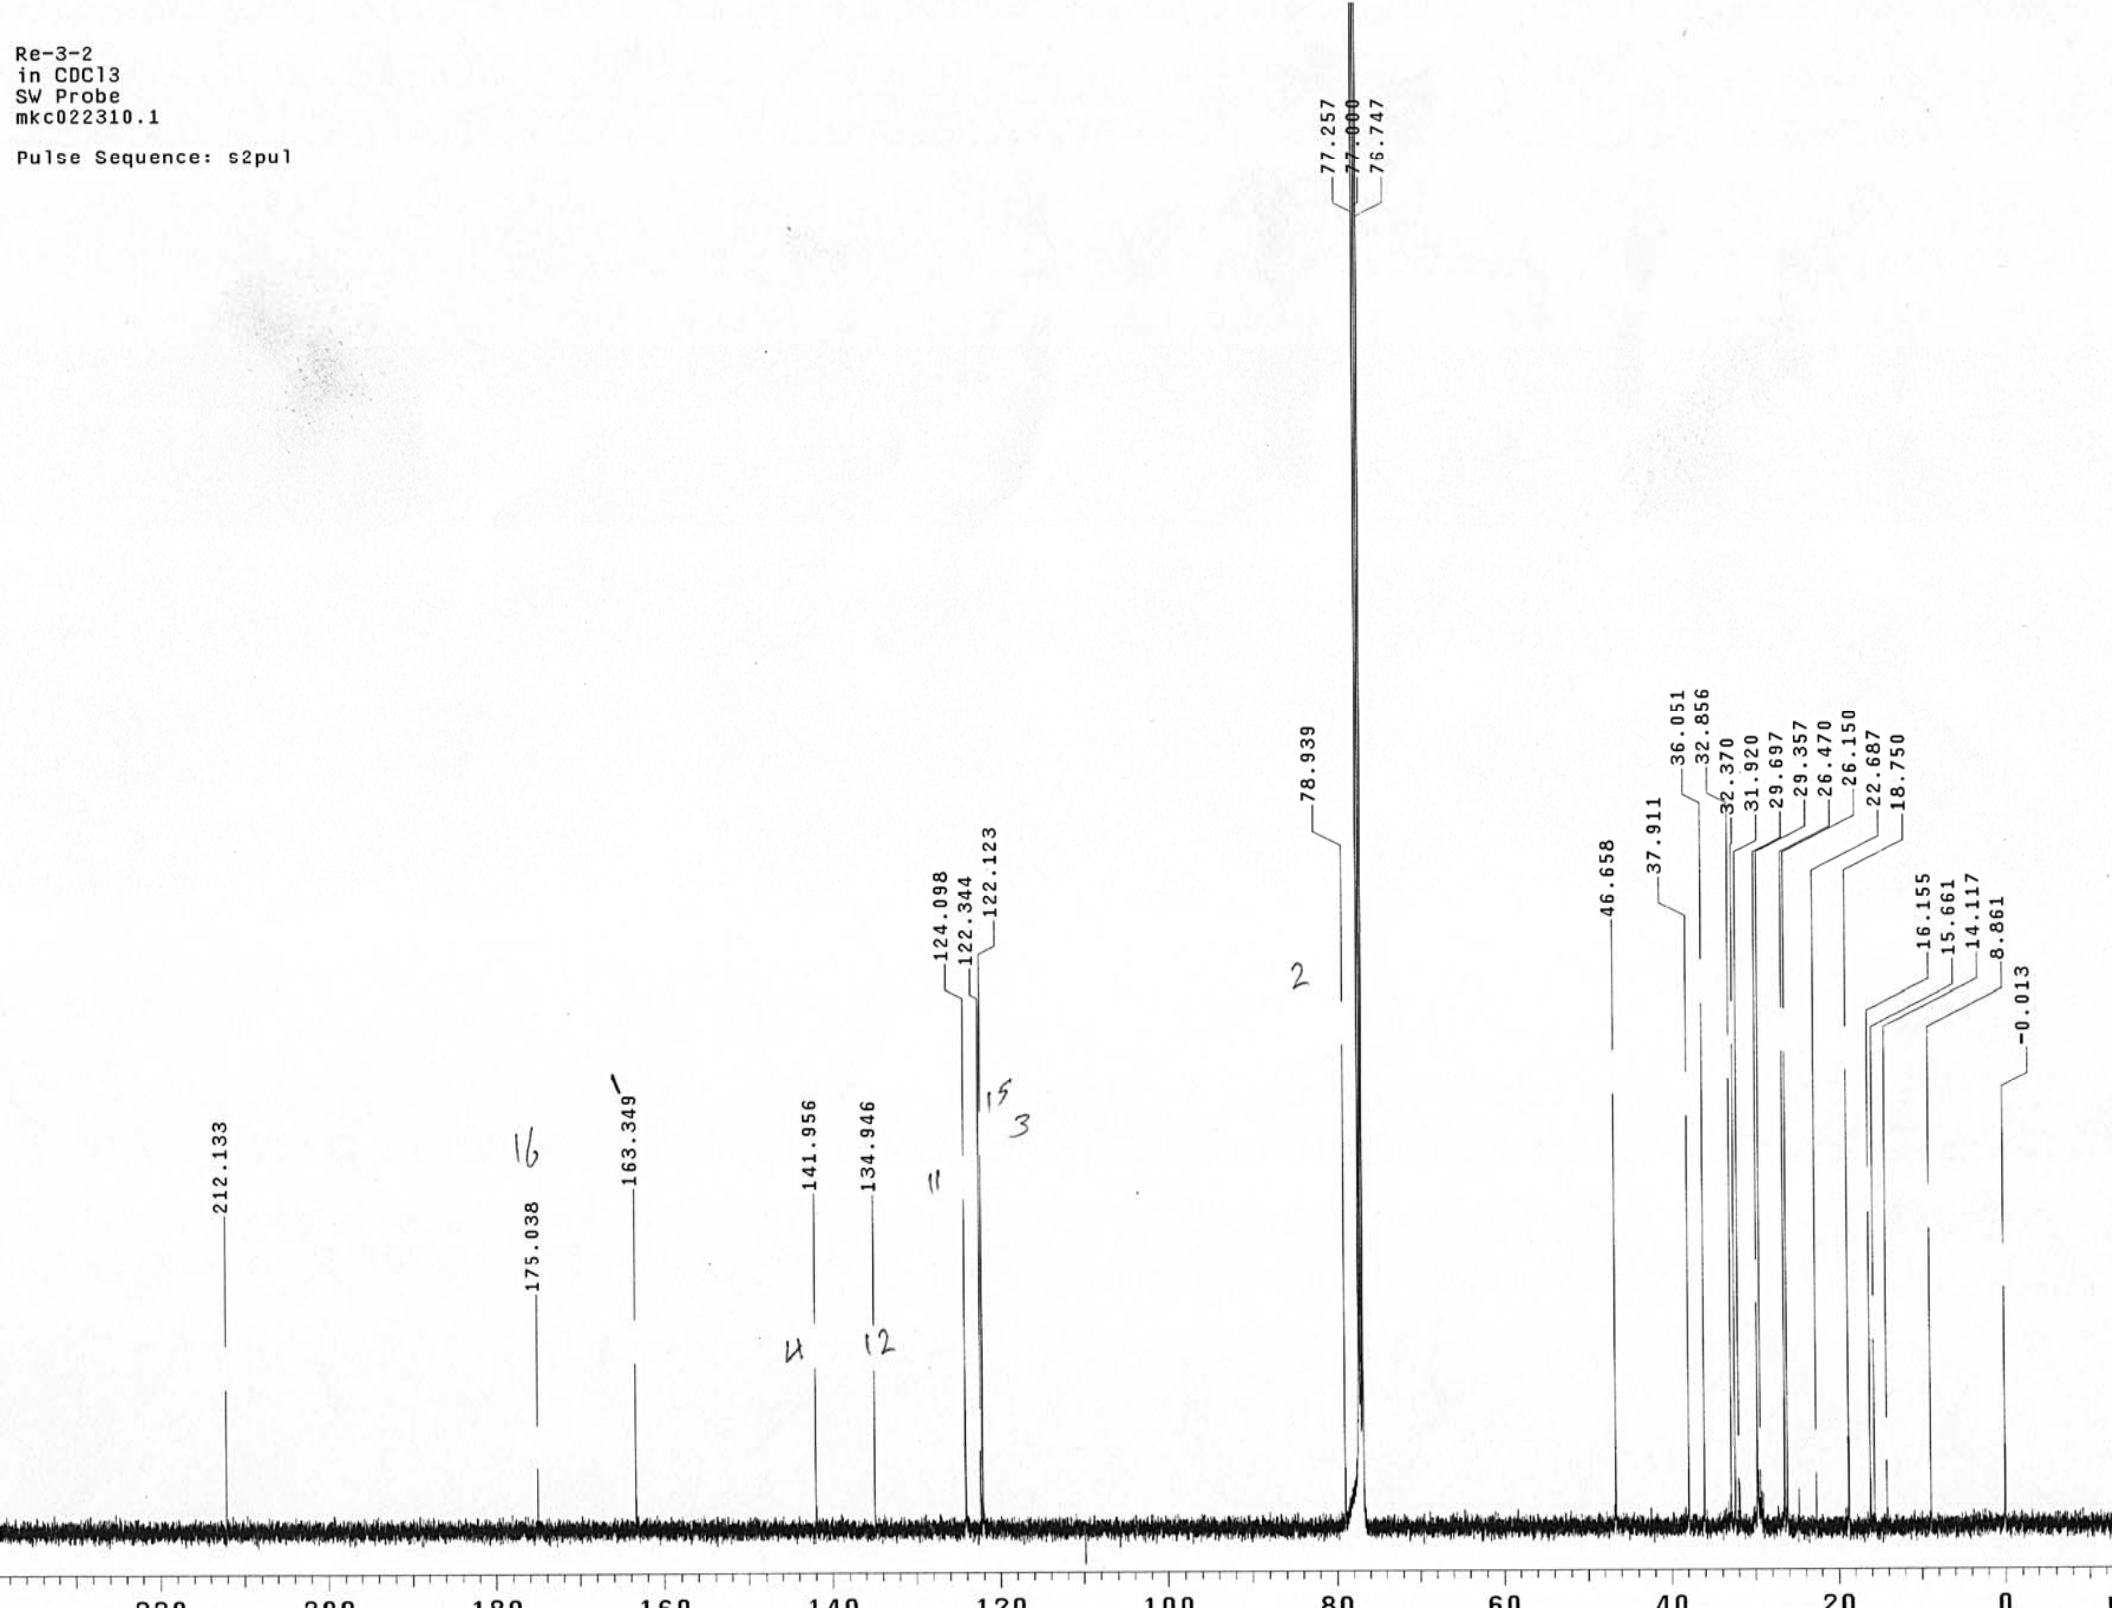

Re-3-2  
in CDCl3  
SW Probe  
mkc022310.1

Pulse Sequence: s2pu1

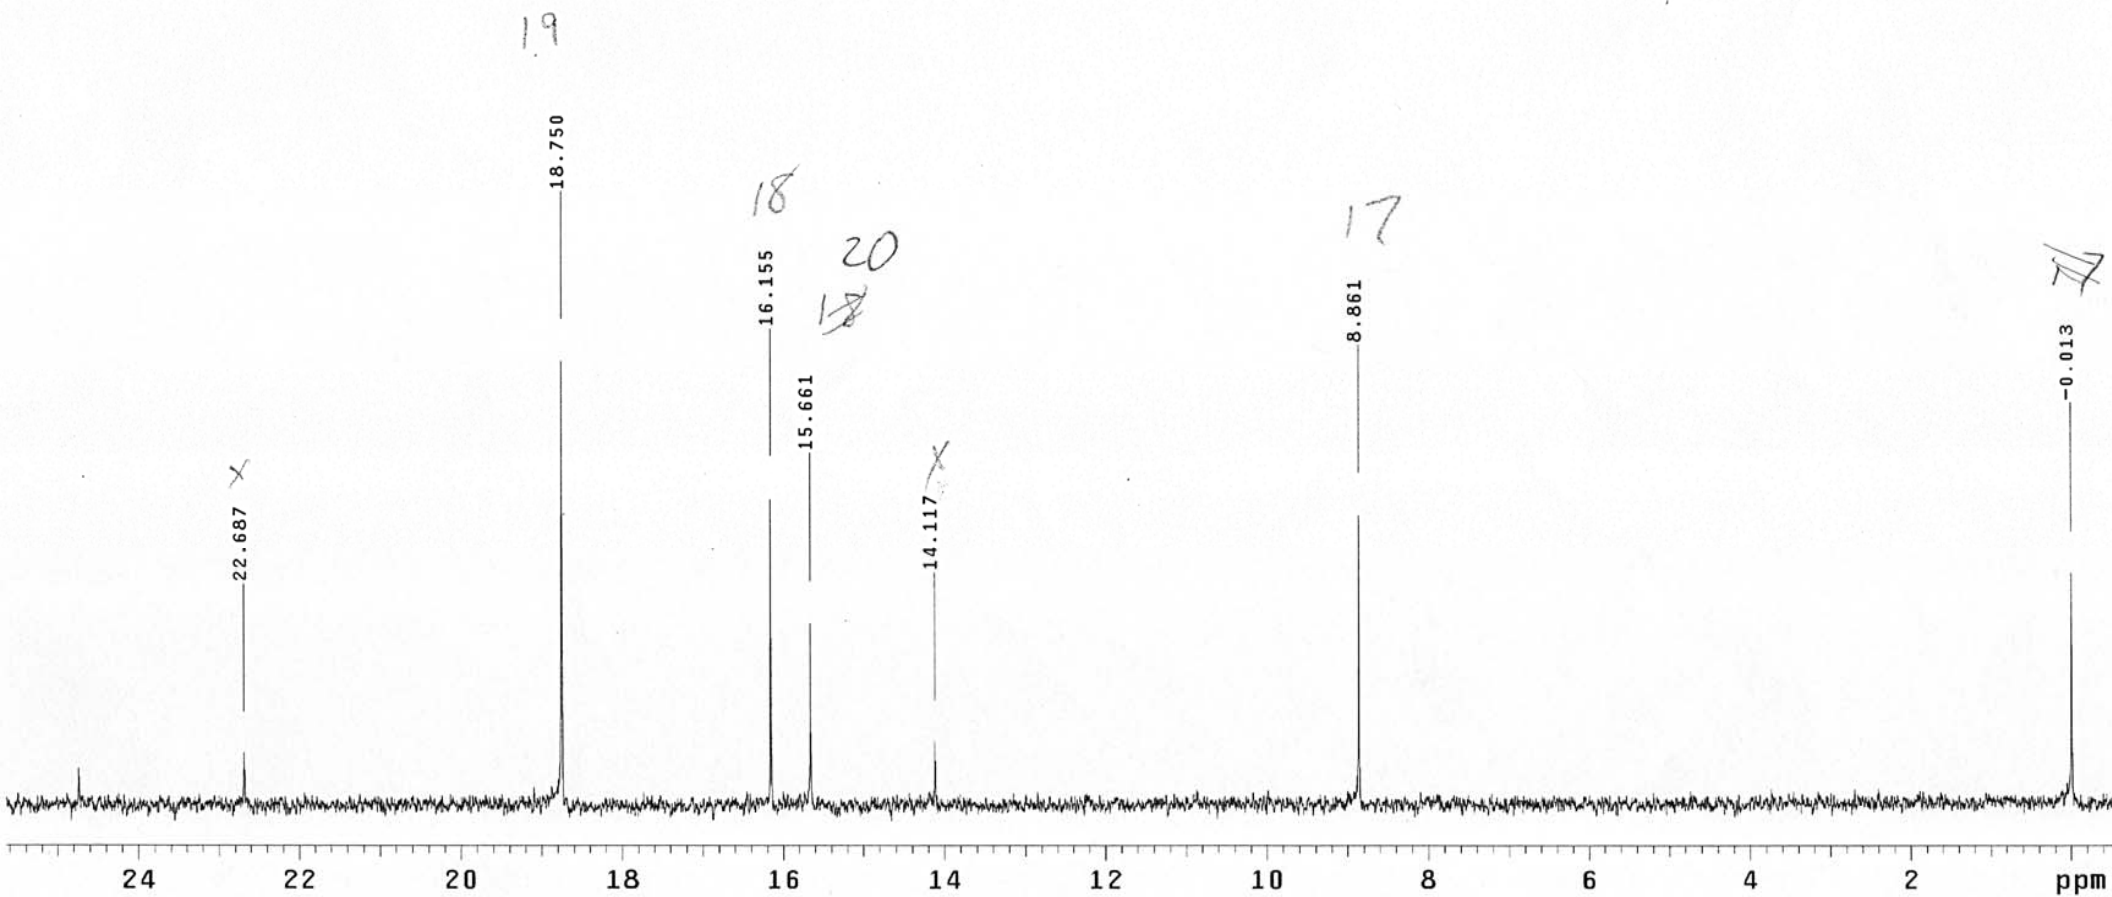

e-3-2  
n CDC13  
W Probe  
k022310.1

Pulse Sequence: s2pu1

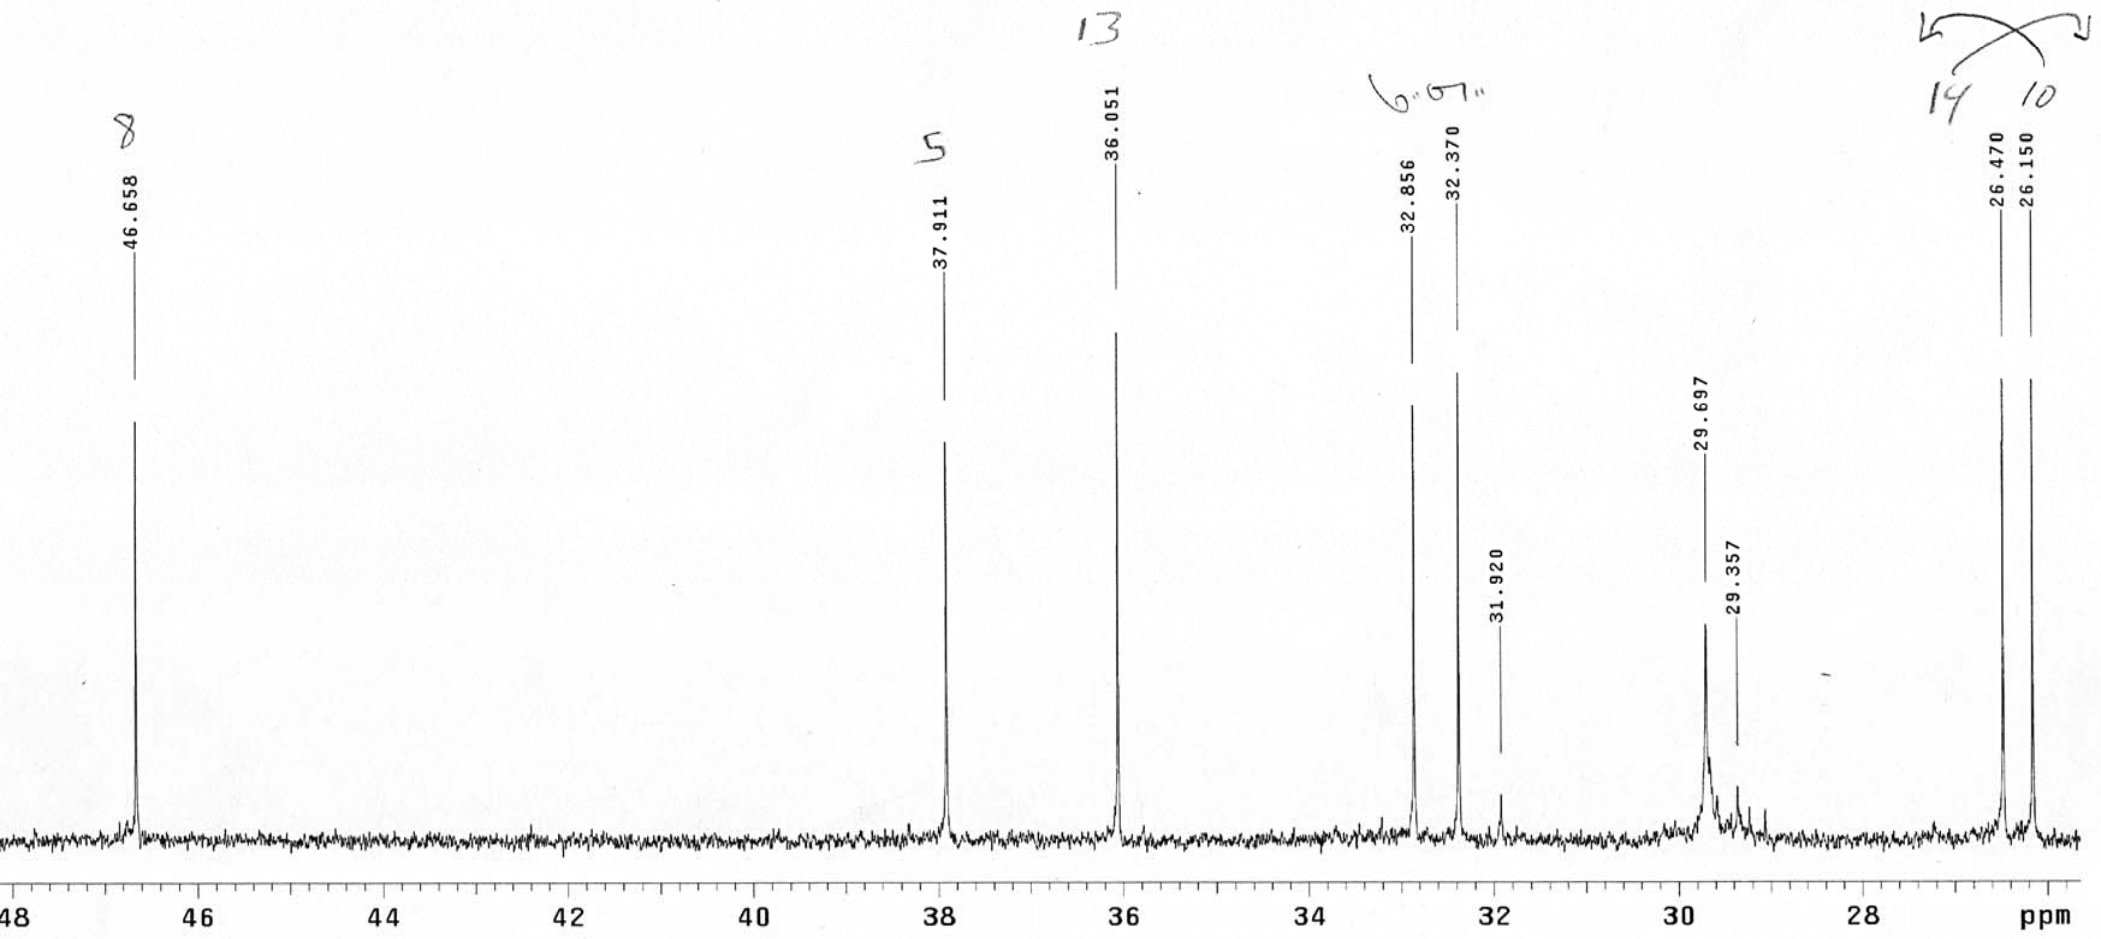

Re-3-2  
Gradient COSY  
in CDCl3  
SW Probe  
mkgcosy022310.1

Pulse Sequence: gCOSY  
Solvent: CDCl3  
Temp. 23.0 C / 296.1 K  
INOVA-500 "inova500a"

Relax. delay 1.000 sec  
Acq. time 0.818 sec  
Width 5006.3 Hz  
2D Width 5006.3 Hz  
4 repetitions  
256 increments  
OBSERVE H1, 499.7081717 MHz  
DATA PROCESSING  
Sq. sine bell 0.102 sec  
F1 DATA PROCESSING  
Sq. sine bell 0.026 sec  
FT size 8192 x 8192  
Total time 32 min, 10 sec

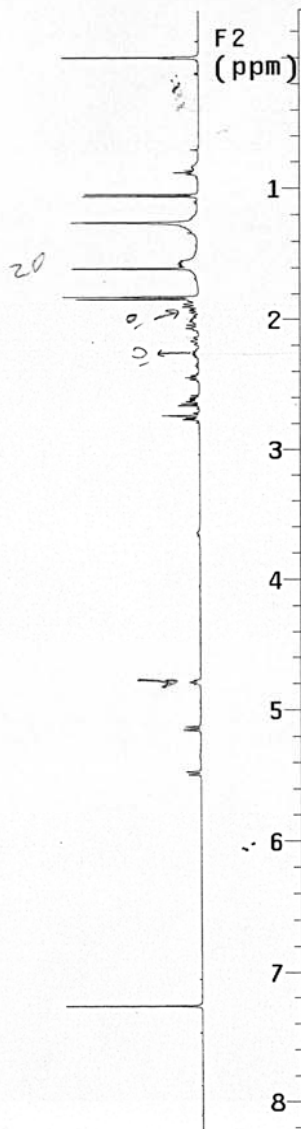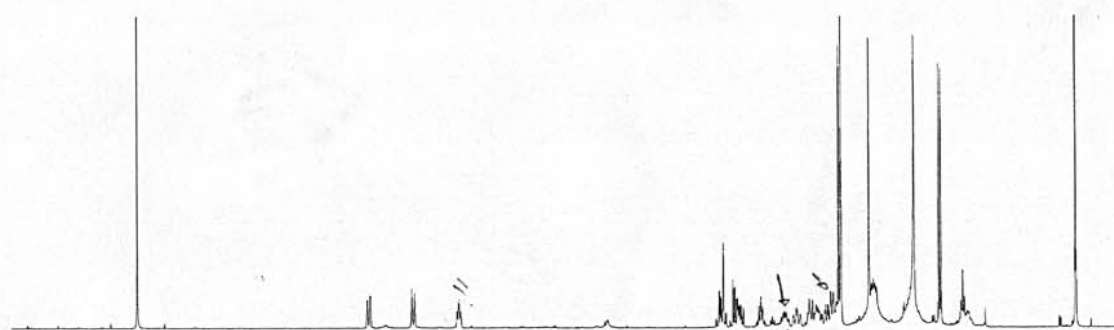

F2  
(ppm)

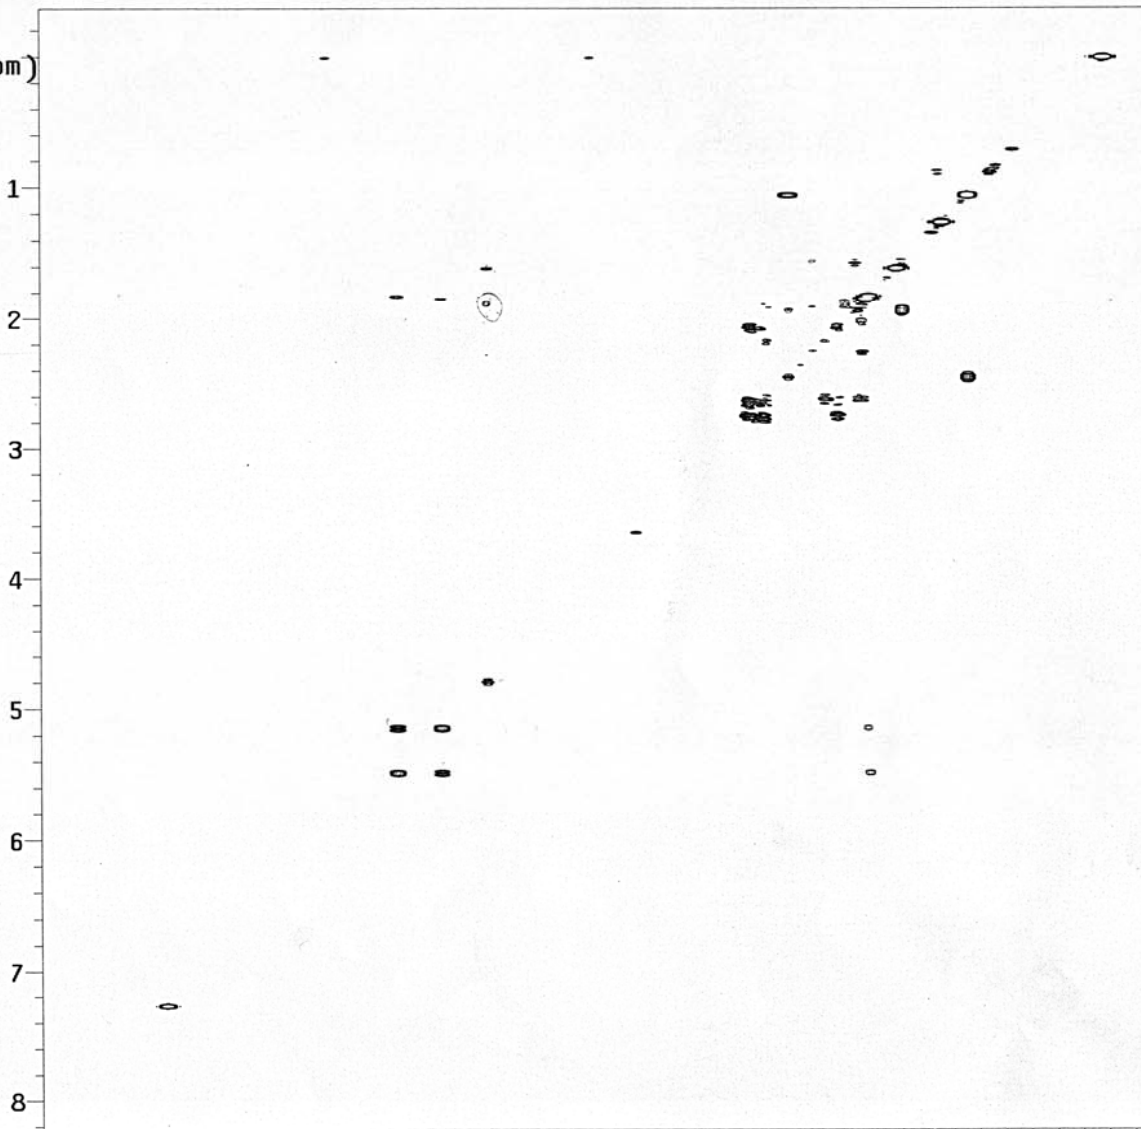

F1 (ppm)

3-2  
radient HSQC  
1 peaks  
CDC13  
Probe  
ghsqc022310.1  
Pulse Sequence: gHSQC  
Solvent: CDC13  
Temp. 23.0 C / 296.1 K  
Date: 1-14-87  
PVA-500 "inova500a"

Relax. delay 1.000 sec  
Acq. time 0.205 sec  
Width 5006.3 Hz  
SFO Width 21361.8 Hz  
28 repetitions  
x 200 increments  
SERVE H1, 499.7081755 MHz  
COUPLE C13, 125.6611136 MHz  
Power 43 dB  
On during acquisition  
Off during delay  
SARF-1 modulated  
DATA PROCESSING  
Gauss apodization 0.094 sec  
DATA PROCESSING  
Gauss apodization 0.011 sec  
Size 2048 x 2048  
Total time 18 hr, 10 min, 57 sec

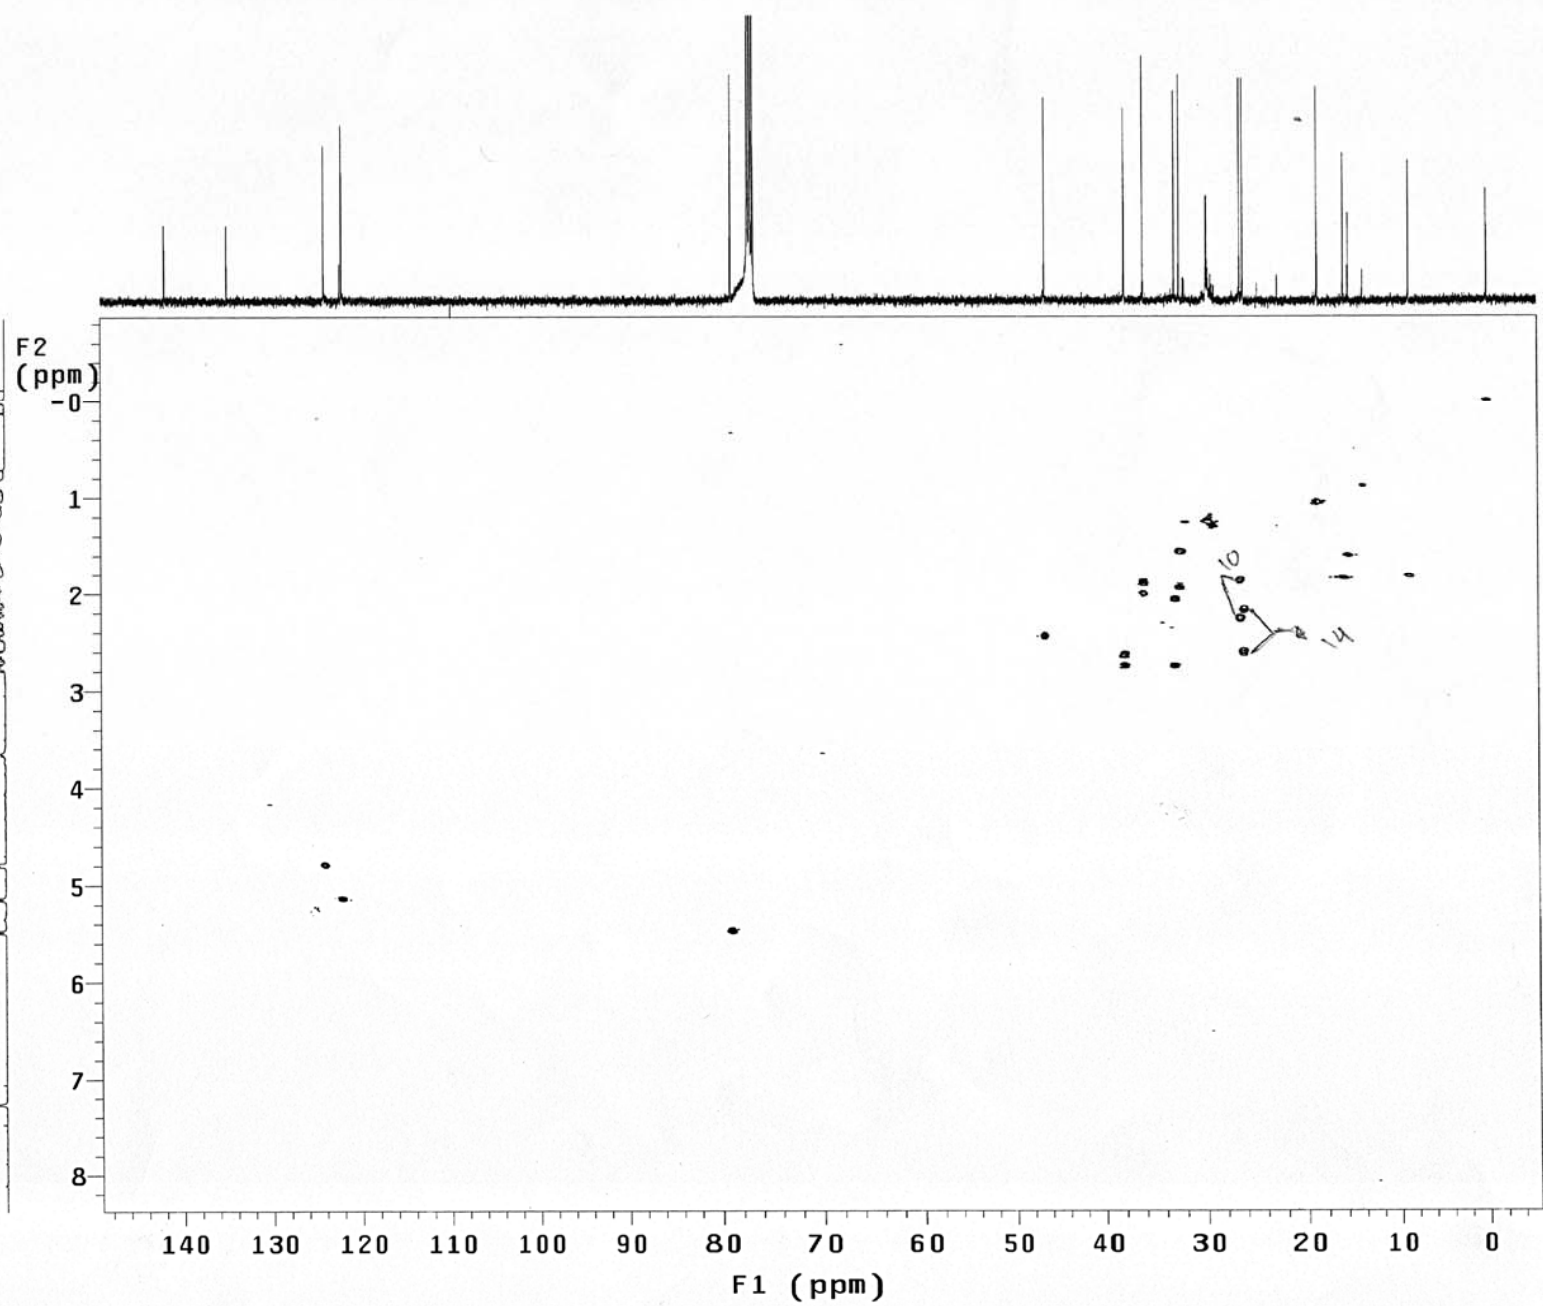

Re-3-2  
Gradient HSQC  
all peaks  
in CDC13  
SW Probe  
mkghsqc022310.1

Pulse Sequence: gHSQC

Solvent: CDC13  
Temp. 23.0 C / 296.1 K  
User: 1-14-87  
INOVA-500 "inova500a"

Relax. delay 1.000 sec  
Acq. time 0.205 sec  
Width 5006.3 Hz  
2D Width 21361.8 Hz  
128 repetitions  
2 x 200 increments  
OBSERVE H1, 499.7081755 MHz  
DECOUPLE C13, 125.6611136 MHz  
Power 43 dB  
on during acquisition  
off during delay  
GARP-1 modulated  
DATA PROCESSING  
Gauss apodization 0.094 sec  
F1 DATA PROCESSING  
Gauss apodization 0.011 sec  
FT size 2048 x 2048  
Total time 18 hr, 10 min, 57 sec

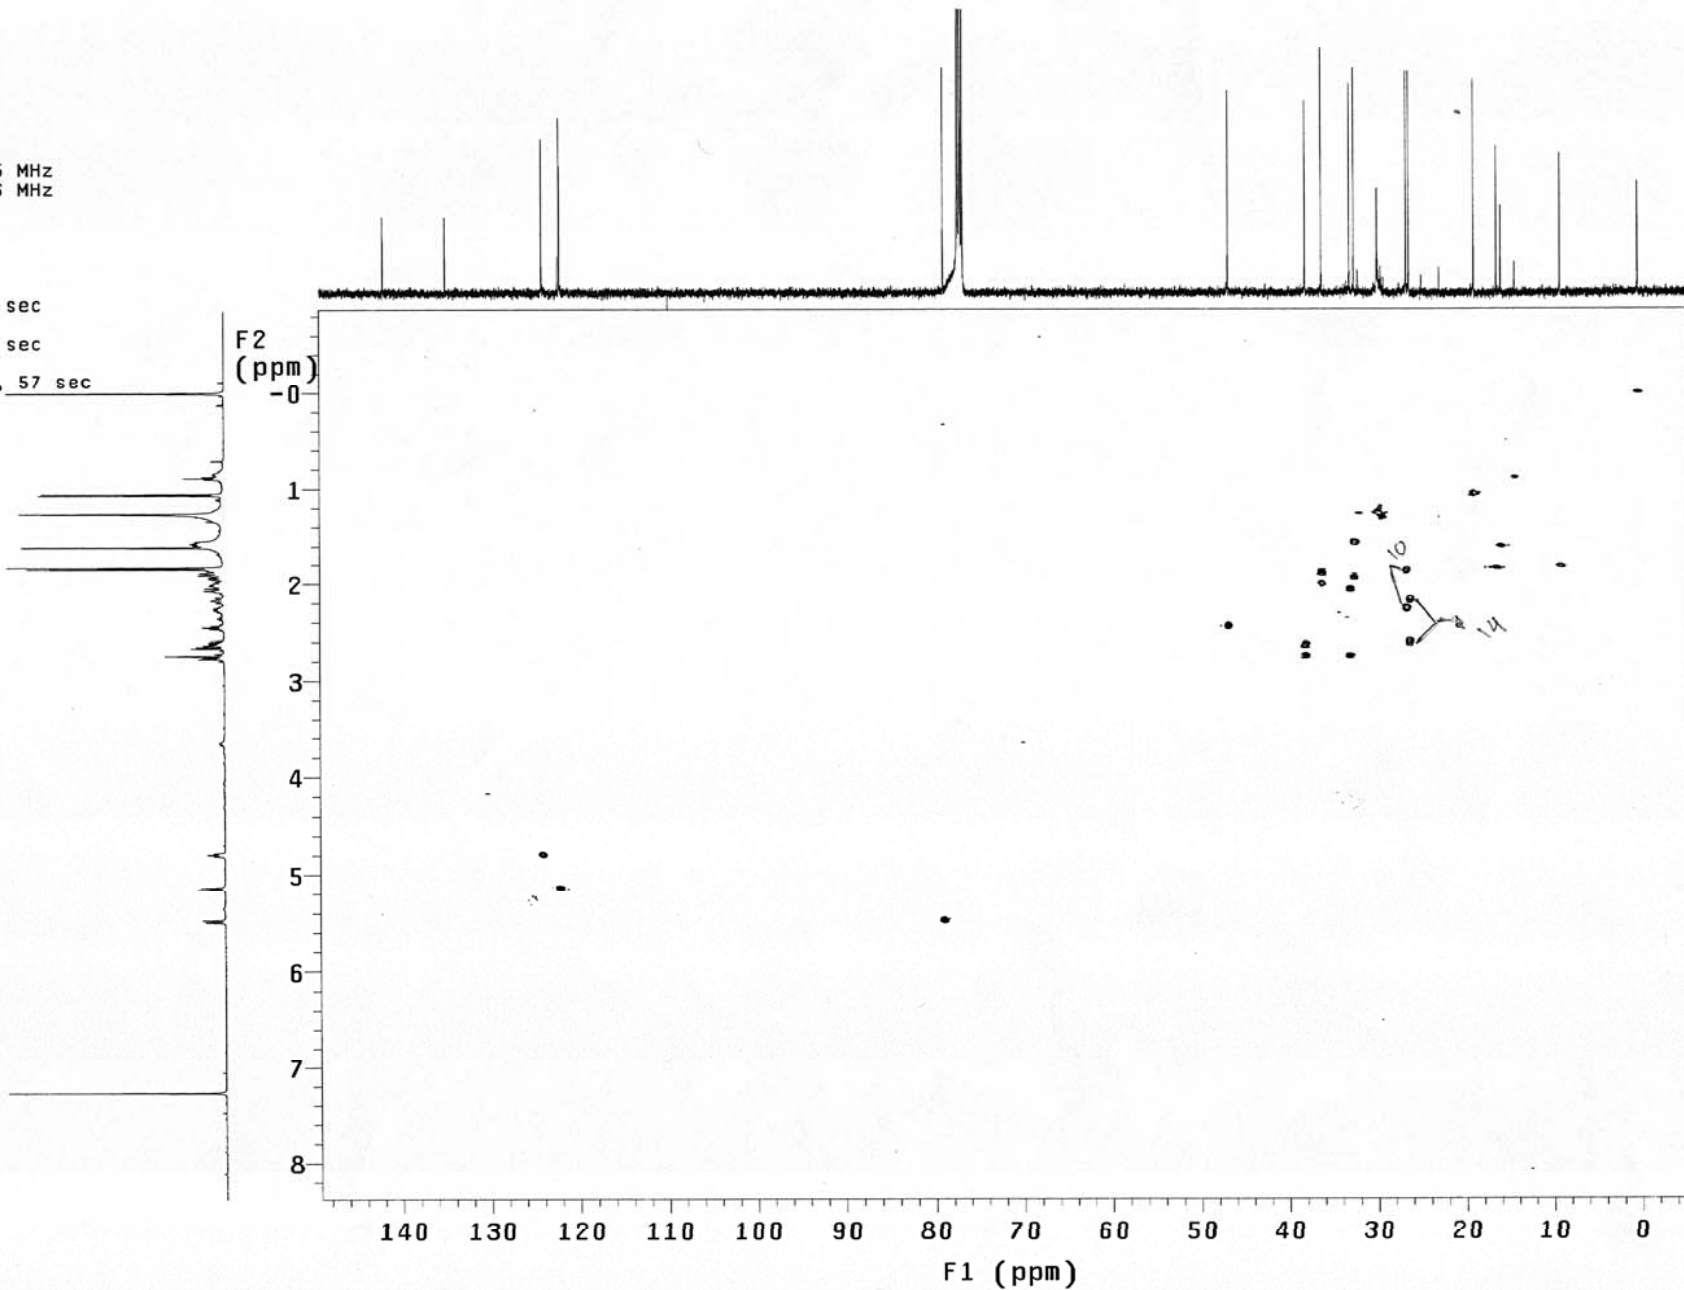



Re-3-2  
Gradient HSQC  
CH2 peaks only  
in CDCl3  
SW Probe  
mkghsqc022310.1

Pulse Sequence: gHSQC

Solvent: CDCl3  
Temp. 23.0 C / 296.1 K  
User: 1-14-87  
INOVA-500 "inova500a"

Relax. delay 1.000 sec  
Acq. time 0.205 sec  
Width 5006.3 Hz  
2D Width 21361.8 Hz  
128 repetitions  
2 x 200 increments  
OBSERVE H1, 499.7081755 MHz  
DECOUPLE C13, 125.6611136 MHz  
Power 43 dB  
on during acquisition  
off during delay  
GARP-1 modulated  
DATA PROCESSING  
Gauss apodization 0.094 sec  
F1 DATA PROCESSING  
Gauss apodization 0.011 sec  
FT size 2048 x 2048  
Total time 18 hr, 10 min, 57 sec

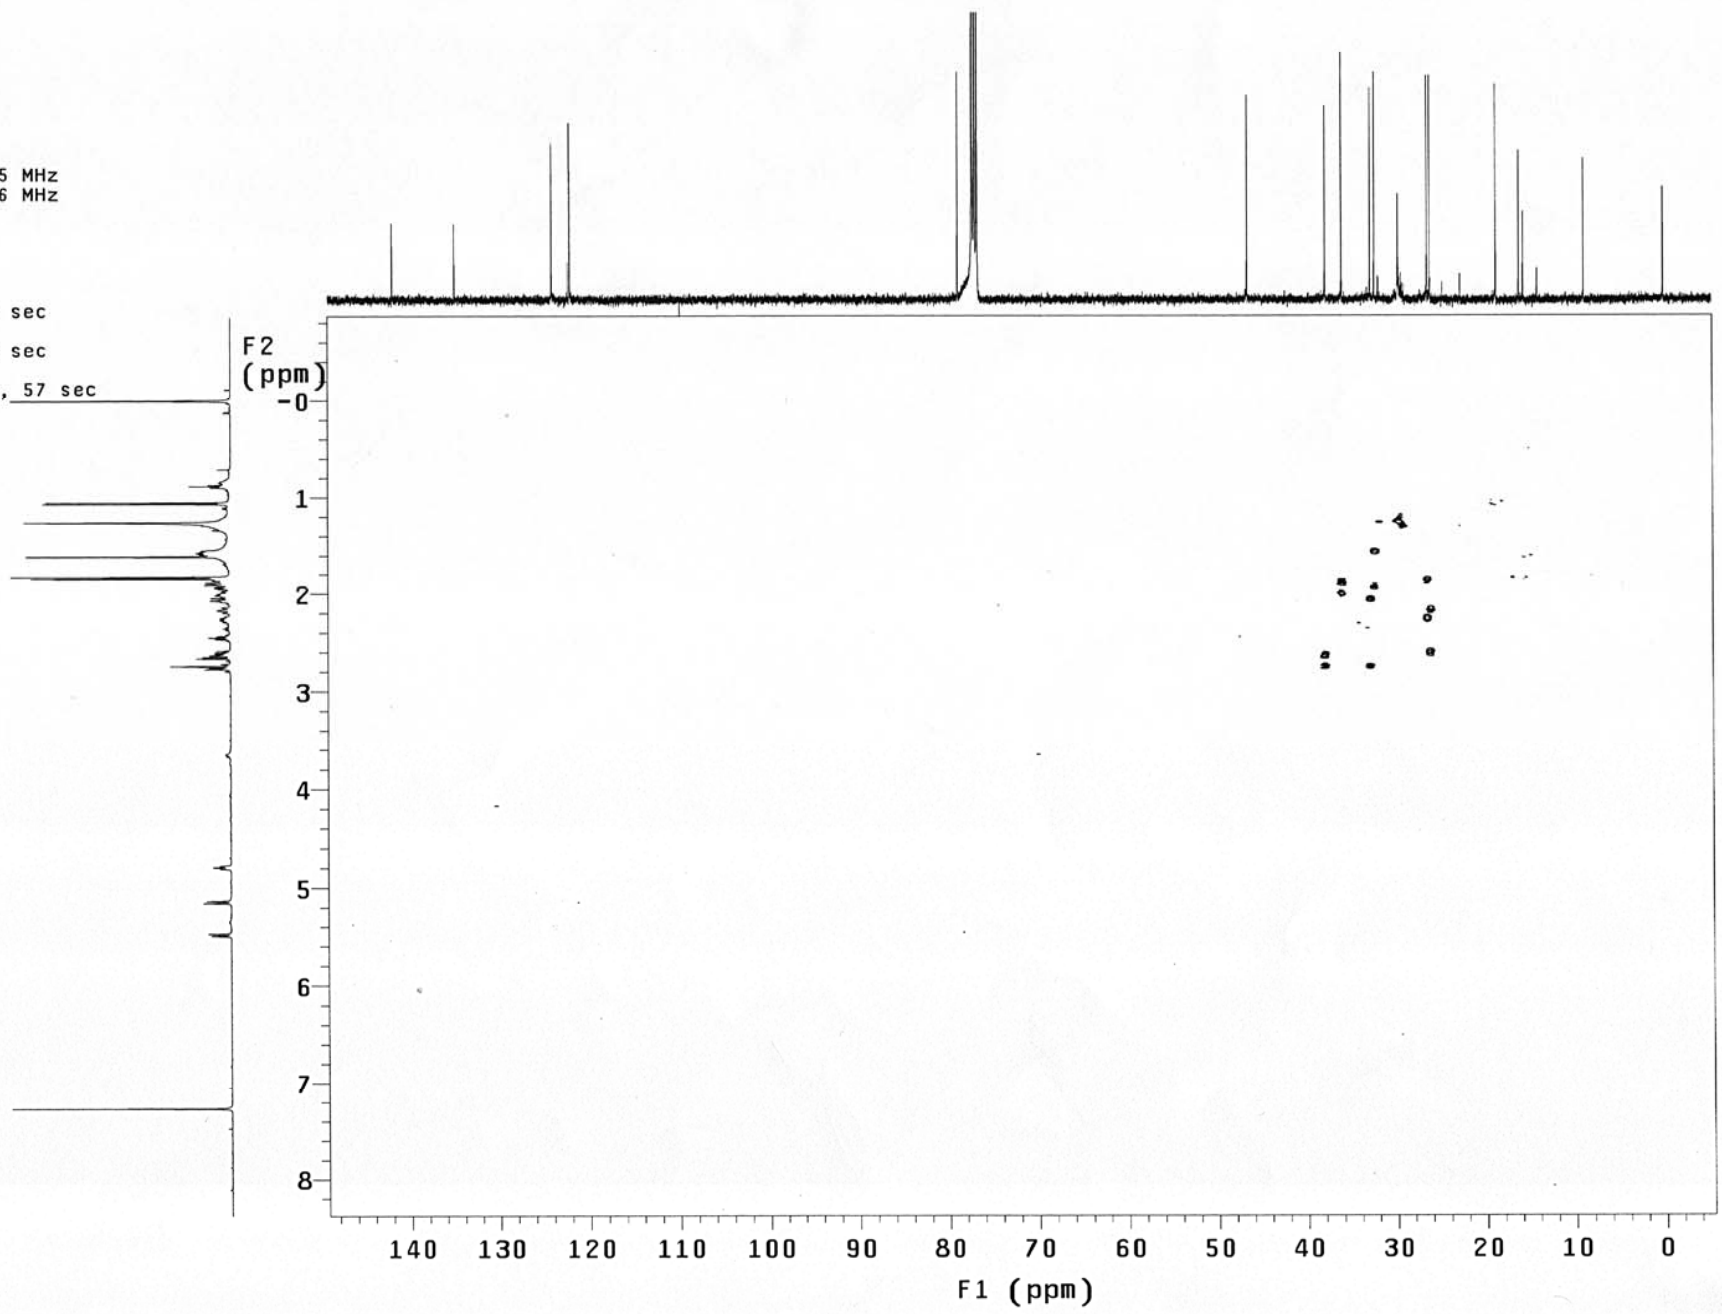

Re-3-2  
Gradient HSQC  
CH and CH3 peaks only  
in CDCl3  
SW Probe  
mkghsqc022310.1

Pulse Sequence: gHSQC

Solvent: CDCl3  
Temp. 23.0 C / 296.1 K  
User: 1-14-87  
INOVA-500 "inova500a"

Relax. delay 1.000 sec  
Acq. time 0.205 sec  
Width 5006.3 Hz  
2D Width 21361.8 Hz  
128 repetitions  
2 x 200 increments  
OBSERVE H1, 499.7081755 MHz  
DECOUPLE C13, 125.6611136 MHz  
Power 43 dB  
on during acquisition  
off during delay  
GARP-1 modulated  
DATA PROCESSING  
Gauss apodization 0.094 sec  
F1 DATA PROCESSING  
Gauss apodization 0.011 sec  
FT size 2048 x 2048  
Total time 18 hr, 10 min, 57 sec

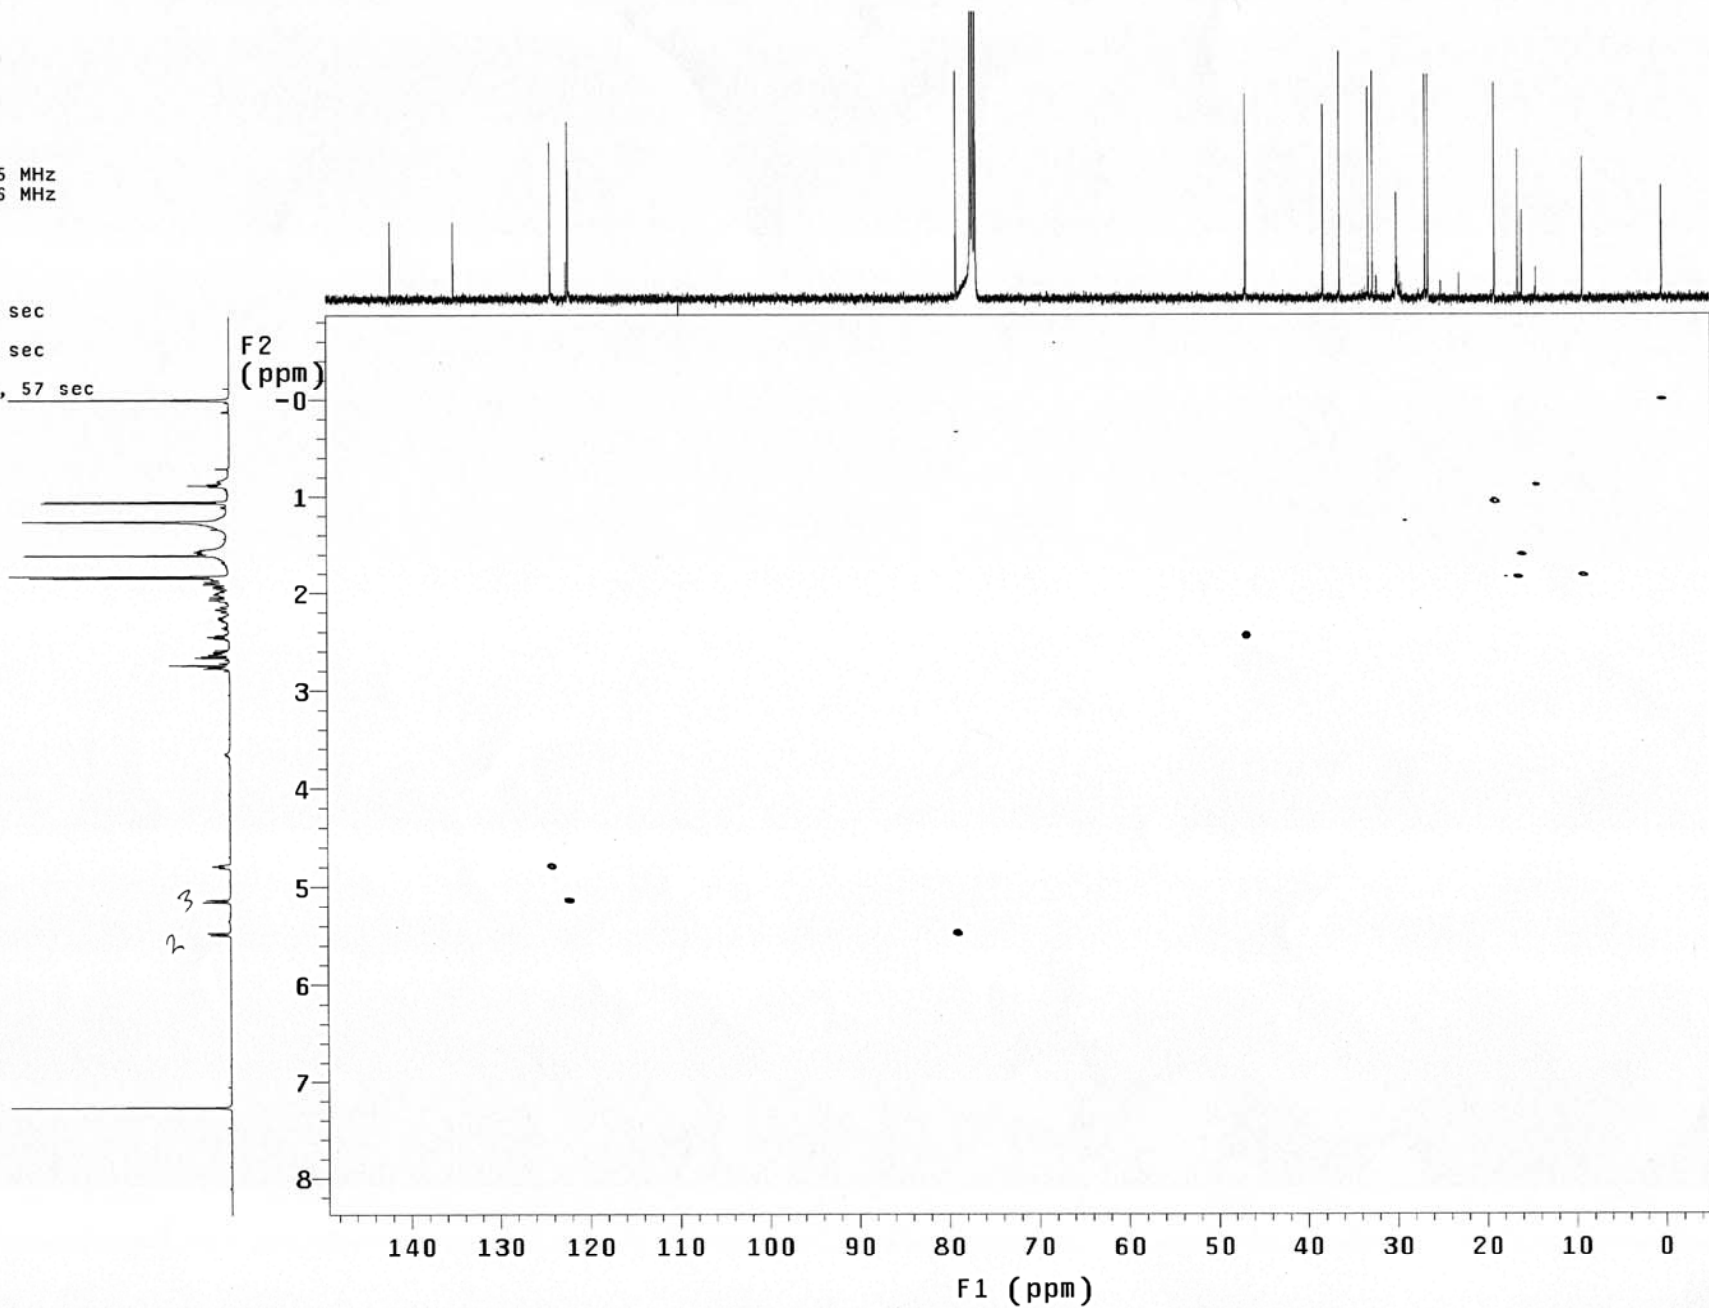

Re-3-2  
Gradient HMBC  
in CDCl3  
SW Probe  
mkghmbc022310.1

Pulse Sequence: gHMBC

Solvent: CDCl3  
Temp. 23.0 C / 296.1 K  
User: 1-14-87  
INOVA-500 "inova500a"

Relax. delay 1.000 sec  
Acq. time 0.205 sec  
Width 5006.3 Hz  
2D Width 30154.5 Hz  
400 repetitions  
400 increments  
OBSERVE H1, 499.7081753 MHz  
DATA PROCESSING  
Sine bell 0.102 sec  
F1 DATA PROCESSING  
Sine bell 0.007 sec  
FT size 2048 x 2048  
Total time 57 hr, 28 min, 28 sec

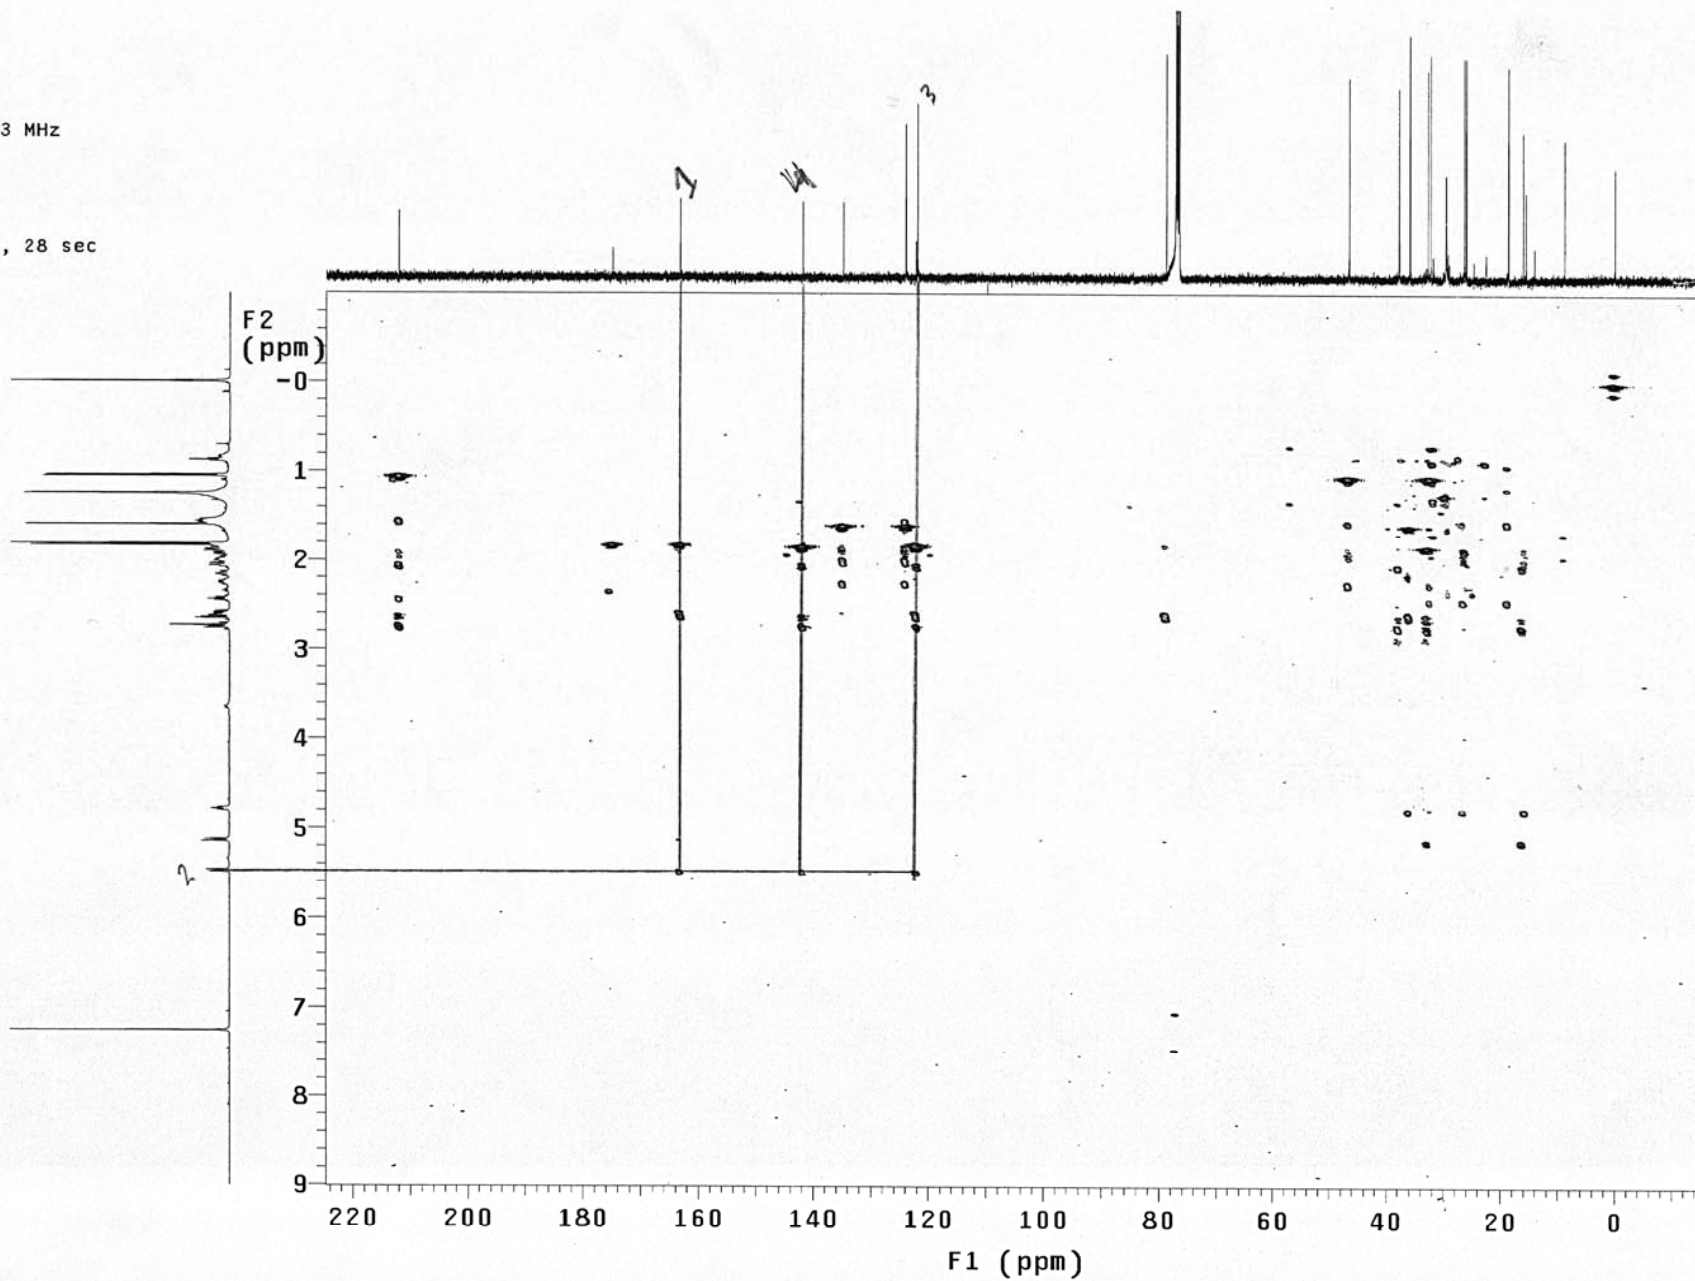

Re-3-2  
NOESY  
positive peaks only  
d1=3 mix=1 nt=24  
in CDC13  
SW Probe  
mknoesy022310.1

Pulse Sequence: NOESY

Solvent: CDC13  
Temp. 23.0 C / 296.1 K  
INOVA-500 "inova500a"

Relax. delay 3.000 sec  
Mixing 1.000 sec  
Acq. time 0.818 sec  
Width 5006.3 Hz  
2D Width 5006.3 Hz  
24 repetitions  
2 x 256 increments  
OBSERVE H1, 499.7081754 MHz  
DATA PROCESSING  
Gauss apodization 0.094 sec  
F1 DATA PROCESSING  
Gauss apodization 0.037 sec  
FT size 8192 x 8192  
Total time 16 hr, 37 min, 22 sec

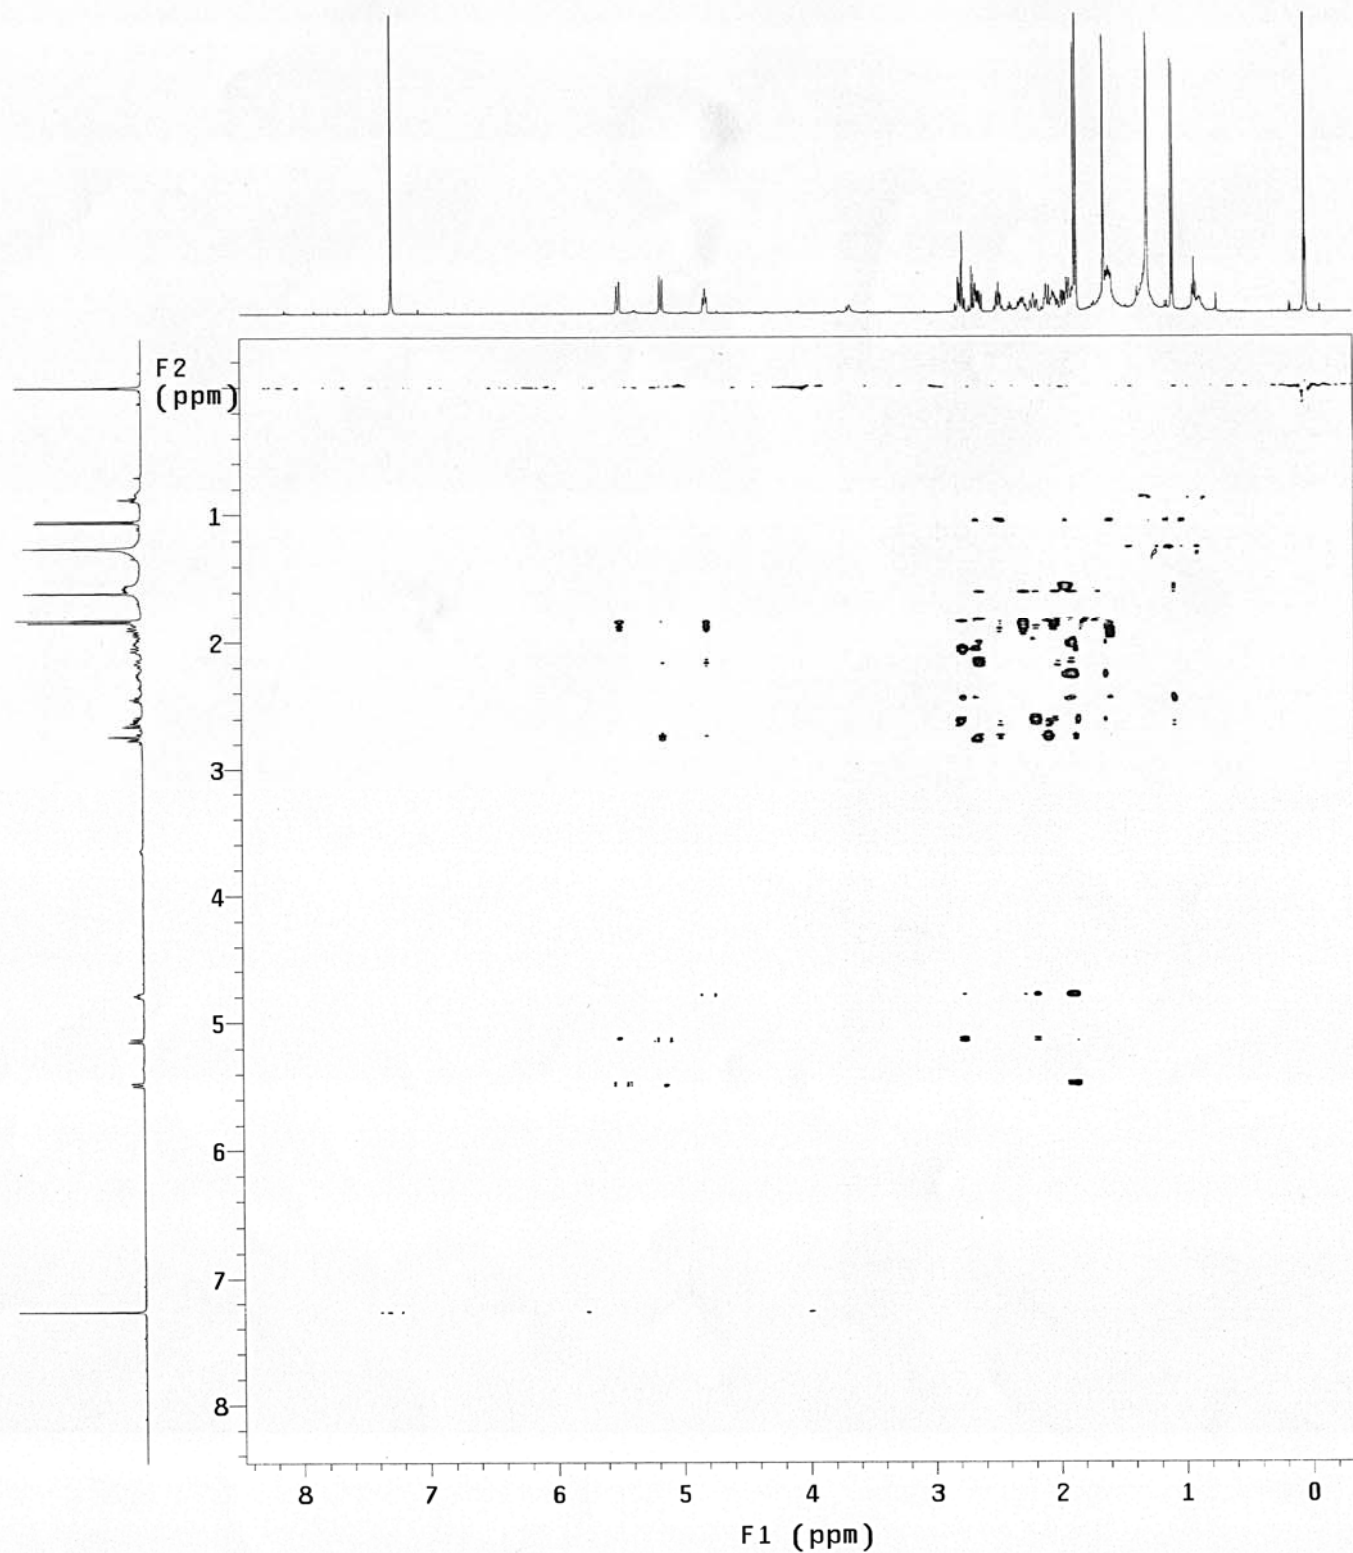

data\_2010031601brwpare3555\_0m

```
_audit_creation_method          SHELXL-97
_chemical_name_systematic
;
?
;
_chemical_name_common           ?
_chemical_melting_point         ?
_chemical_formula_moiety        ?
_chemical_formula_sum           'C20 H28 O5'
_chemical_formula_weight        348.42

loop_
  _atom_type_symbol
  _atom_type_description
  _atom_type_scatter_dispersion_real
  _atom_type_scatter_dispersion_imag
  _atom_type_scatter_source
  'C'  'C'  0.0033  0.0016
  'International Tables Vol C Tables 4.2.6.8 and 6.1.1.4'
  'H'  'H'  0.0000  0.0000
  'International Tables Vol C Tables 4.2.6.8 and 6.1.1.4'
  'O'  'O'  0.0106  0.0060
  'International Tables Vol C Tables 4.2.6.8 and 6.1.1.4'

_symmetry_cell_setting          ?
_symmetry_space_group_name_H-M  P 1 2(1) 1

loop_
  _symmetry_equiv_pos_as_xyz
  'x, y, z'
  '-x, y+1/2, -z'

_cell_length_a                  10.0622(18)
_cell_length_b                   5.5509(10)
_cell_length_c                   16.834(3)
_cell_angle_alpha                 90.00
_cell_angle_beta                 95.538(2)
_cell_angle_gamma                 90.00
_cell_volume                      935.9(3)
_cell_formula_units_Z             2
_cell_measurement_temperature     150(2)
_cell_measurement_reflns_used     56
_cell_measurement_theta_min       3.36
_cell_measurement_theta_max      11.74

_exptl_crystal_description       flat needle
_exptl_crystal_colour            colourless
_exptl_crystal_size_max          0.87
_exptl_crystal_size_mid          0.15
_exptl_crystal_size_min          0.02
```

```

_exptl_crystal_density_meas      ?
_exptl_crystal_density_diffn    1.236
_exptl_crystal_density_method   'not measured'
_exptl_crystal_F_000            376
_exptl_absorpt_coefficient_mu    0.088
_exptl_absorpt_correction_type   empirical
_exptl_absorpt_correction_T_min 0.9274
_exptl_absorpt_correction_T_max 0.9982
_exptl_absorpt_process_details  ?

_exptl_special_details
;
?
;

_diffn_ambient_temperature      150(2)
_diffn_radiation_wavelength     0.71073
_diffn_radiation_type           MoK\alpha
_diffn_radiation_source         'fine-focus sealed tube'
_diffn_radiation_monochromator  graphite
_diffn_measurement_device_type  Bruker Smart Apex II
_diffn_measurement_method       ?
_diffn_detector_area_resol_mean ?
_diffn_reflns_number            4644
_diffn_reflns_av_R_equivalents  0.0357
_diffn_reflns_av_sigmaI/netI    0.0355
_diffn_reflns_limit_h_min       -8
_diffn_reflns_limit_h_max       8
_diffn_reflns_limit_k_min       -4
_diffn_reflns_limit_k_max       4
_diffn_reflns_limit_l_min       -14
_diffn_reflns_limit_l_max       14
_diffn_reflns_theta_min         1.22
_diffn_reflns_theta_max         18.45
_reflns_number_total            1364
_reflns_number_gt               1257
_reflns_threshold_expression     >2sigma(I)

_computing_data_collection      ?
_computing_cell_refinement      ?
_computing_data_reduction       ?
_computing_structure_solution   'SHELXS-97 (Sheldrick, 2008)'
_computing_structure_refinement 'SHELXL-97 (Sheldrick, 2008)'
_computing_molecular_graphics   ?
_computing_publication_material ?

```

\_refine\_special\_details

;

Refinement of  $F^2$  against ALL reflections. The weighted R-factor wR and

goodness of fit S are based on  $F^2$ , conventional R-factors R are based on F, with F set to zero for negative  $F^2$ . The threshold expression of  $F^2 > 2\sigma(F^2)$  is used only for calculating R-factors(gt) etc. and is

not relevant to the choice of reflections for refinement. R-factors based on  $F^2$  are statistically about twice as large as those based on  $F$ , and R-factors based on ALL data will be even larger.

```

_refine_ls_structure_factor_coef  Fsqd
_refine_ls_matrix_type            full
_refine_ls_weighting_scheme       calc
_refine_ls_weighting_details
'calc w=1/[\s^2^(Fo^2^)+(0.0209P)^2^+0.1056P] where P=(Fo^2^+2Fc^2^)/3'
_atom_sites_solution_primary      direct
_atom_sites_solution_secondary    difmap
_atom_sites_solution_hydrogens    geom
_refine_ls_hydrogen_treatment     mixed
_refine_ls_extinction_method      SHELXL
_refine_ls_extinction_coef        0.015(2)
_refine_ls_extinction_expression
'Fc^*=kFc[1+0.001xFc^2^\l^3^/sin(2\q)]^-1/4^'
_refine_ls_abs_structure_details
'Flack H D (1983), Acta Cryst. A39, 876-881'
_refine_ls_abs_structure_Flack    -0.4(15)
_refine_ls_number_reflns          1364
_refine_ls_number_parameters      339
_refine_ls_number_restraints      1
_refine_ls_R_factor_all           0.0307
_refine_ls_R_factor_gt            0.0254
_refine_ls_wR_factor_ref          0.0513
_refine_ls_wR_factor_gt          0.0492
_refine_ls_goodness_of_fit_ref    1.075
_refine_ls_restrained_S_all       1.075
_refine_ls_shift/su_max           0.011
_refine_ls_shift/su_mean          0.001

```

loop\_

```

_atom_site_label
_atom_site_type_symbol
_atom_site_fract_x
_atom_site_fract_y
_atom_site_fract_z
_atom_site_U_iso_or_equiv
_atom_site_adp_type
_atom_site_occupancy
_atom_site_symmetry_multiplicity
_atom_site_calc_flag
_atom_site_refinement_flags
_atom_site_disorder_assembly
_atom_site_disorder_group
O1 O 0.3619(2) 0.2048(6) 0.77785(14) 0.0326(8) Uani 1 1 d . . .
O2 O 0.4353(2) 0.5048(5) 0.70604(15) 0.0293(8) Uani 1 1 d . . .
O3 O 0.9426(2) 1.4265(5) 0.63634(13) 0.0368(8) Uani 1 1 d . . .
O4 O 1.1459(3) 1.0112(5) 0.91293(13) 0.0338(8) Uani 1 1 d . . .
O5 O 1.2766(3) 0.9113(6) 0.89952(17) 0.0447(9) Uani 1 1 d . . .

```

C1 C 0.5647(4) 0.6974(8) 0.8095(2) 0.0224(10) Uani 1 1 d . . .  
C2 C 0.5196(4) 0.7197(8) 0.7220(2) 0.0240(11) Uani 1 1 d . . .  
C3 C 0.6244(4) 0.7328(9) 0.6655(2) 0.0238(11) Uani 1 1 d . . .  
C4 C 0.6235(3) 0.8784(7) 0.6035(2) 0.0230(10) Uani 1 1 d . . .  
C5 C 0.7380(5) 0.8887(9) 0.5521(3) 0.0283(12) Uani 1 1 d . . .  
C6 C 0.8047(5) 1.1359(8) 0.5486(3) 0.0302(12) Uani 1 1 d . . .  
C7 C 0.8606(4) 1.2139(8) 0.6295(3) 0.0243(11) Uani 1 1 d . . .  
C8 C 1.0004(4) 1.1961(8) 0.6620(2) 0.0275(11) Uani 1 1 d . . .  
C9 C 1.0323(5) 1.1732(9) 0.7504(2) 0.0285(13) Uani 1 1 d . . .  
C10 C 1.0558(5) 0.9113(9) 0.7764(2) 0.0282(12) Uani 1 1 d . . .  
C11 C 1.0477(4) 0.8686(9) 0.8655(2) 0.0249(11) Uani 1 1 d . . .  
C12 C 0.9138(4) 0.9333(8) 0.8918(2) 0.0250(10) Uani 1 1 d . . .  
C13 C 0.8043(4) 0.7618(9) 0.8611(3) 0.0330(12) Uani 1 1 d . . .  
C14 C 0.6638(4) 0.8691(9) 0.8506(3) 0.0294(12) Uani 1 1 d . . .  
C15 C 0.5051(4) 0.5130(8) 0.8404(2) 0.0222(10) Uani 1 1 d . . .  
C16 C 0.4266(4) 0.3896(9) 0.7766(2) 0.0239(11) Uani 1 1 d . . .  
C17 C 0.5048(6) 0.4316(10) 0.9248(3) 0.0332(12) Uani 1 1 d . . .  
C18 C 0.5107(5) 1.0471(10) 0.5781(3) 0.0342(12) Uani 1 1 d . . .  
C19 C 1.1051(5) 1.1029(13) 0.6126(3) 0.0486(17) Uani 1 1 d . . .  
C20 C 0.8939(5) 1.1203(9) 0.9381(3) 0.0351(13) Uani 1 1 d . . .  
H5 H 1.303(6) 1.005(12) 0.865(3) 0.16(3) Uiso 1 1 d . . .  
H2A H 0.462(3) 0.853(6) 0.7144(16) 0.006(10) Uiso 1 1 d . . .  
H3A H 0.700(3) 0.629(6) 0.6769(16) 0.011(11) Uiso 1 1 d . . .  
H5A H 0.702(3) 0.837(5) 0.5002(18) 0.012(10) Uiso 1 1 d . . .  
H6A H 0.879(3) 1.132(6) 0.511(2) 0.039(12) Uiso 1 1 d . . .  
H7A H 0.797(3) 1.210(5) 0.6702(16) 0.007(9) Uiso 1 1 d . . .  
H9A H 0.962(3) 1.228(6) 0.7752(15) 0.002(10) Uiso 1 1 d . . .  
H10A H 1.151(4) 0.862(7) 0.7657(19) 0.049(13) Uiso 1 1 d . . .  
H11A H 1.065(3) 0.686(7) 0.8768(16) 0.015(10) Uiso 1 1 d . . .  
H13A H 0.831(3) 0.671(8) 0.811(2) 0.063(14) Uiso 1 1 d . . .  
H14A H 0.661(3) 1.006(7) 0.8205(17) 0.008(11) Uiso 1 1 d . . .  
H17A H 0.578(3) 0.491(6) 0.9578(17) 0.010(10) Uiso 1 1 d . . .  
H18A H 0.426(4) 1.013(7) 0.603(2) 0.059(14) Uiso 1 1 d . . .  
H19A H 1.080(3) 1.142(7) 0.561(2) 0.043(14) Uiso 1 1 d . . .  
H20A H 0.968(3) 1.222(7) 0.9563(16) 0.028(12) Uiso 1 1 d . . .  
H5B H 0.798(3) 0.778(7) 0.5719(18) 0.013(12) Uiso 1 1 d . . .  
H6B H 0.740(3) 1.243(7) 0.5295(18) 0.023(13) Uiso 1 1 d . . .  
H9B H 1.106(3) 1.274(6) 0.7667(17) 0.022(13) Uiso 1 1 d . . .  
H10B H 0.992(3) 0.821(6) 0.7476(19) 0.034(14) Uiso 1 1 d . . .  
H13B H 0.805(3) 0.611(8) 0.897(2) 0.045(13) Uiso 1 1 d . . .  
H14B H 0.636(3) 0.902(7) 0.904(2) 0.037(11) Uiso 1 1 d . . .  
H17B H 0.508(4) 0.253(10) 0.928(2) 0.068(17) Uiso 1 1 d . . .  
H18B H 0.497(3) 1.062(6) 0.519(2) 0.042(13) Uiso 1 1 d . . .  
H19B H 1.192(4) 1.188(7) 0.6301(19) 0.042(12) Uiso 1 1 d . . .  
H20B H 0.808(3) 1.158(7) 0.9561(18) 0.037(13) Uiso 1 1 d . . .  
H17C H 0.418(4) 0.496(8) 0.949(2) 0.079(15) Uiso 1 1 d . . .  
H18C H 0.532(4) 1.205(9) 0.600(2) 0.057(16) Uiso 1 1 d . . .  
H19C H 1.117(5) 0.935(10) 0.619(3) 0.09(3) Uiso 1 1 d . . .

loop\_

\_atom\_site\_aniso\_label

\_atom\_site\_aniso\_U\_11

\_atom\_site\_aniso\_U\_22

\_atom\_site\_aniso\_U\_33



```

_atom_site_aniso_U_23
_atom_site_aniso_U_13
_atom_site_aniso_U_12
O1 0.0284(18) 0.0296(19) 0.0406(18) -0.0019(17) 0.0077(13) -0.0077(17)
O2 0.0287(16) 0.033(2) 0.0271(18) -0.0013(16) 0.0053(12) -0.0100(15)
O3 0.0412(17) 0.028(2) 0.0384(17) 0.0093(15) -0.0092(13) -0.0067(17)
O4 0.0254(19) 0.043(2) 0.0321(17) 0.0006(16) -0.0014(14) -0.0036(16)
O5 0.022(2) 0.059(2) 0.053(2) 0.015(2) -0.0015(14) 0.0001(18)
C1 0.017(3) 0.017(3) 0.033(3) -0.007(3) 0.002(2) -0.002(3)
C2 0.024(3) 0.014(3) 0.033(3) -0.003(2) 0.000(3) 0.005(3)
C3 0.021(3) 0.024(3) 0.027(3) -0.001(3) 0.004(3) 0.002(3)
C4 0.022(3) 0.023(3) 0.025(3) -0.003(3) 0.006(2) -0.006(3)
C5 0.034(3) 0.030(4) 0.020(3) 0.001(3) 0.000(3) 0.005(3)
C6 0.036(3) 0.025(4) 0.029(3) 0.005(3) 0.000(3) -0.003(3)
C7 0.026(3) 0.016(3) 0.031(3) 0.002(2) 0.005(3) -0.004(3)
C8 0.028(3) 0.028(3) 0.027(3) 0.008(2) 0.004(2) -0.005(2)
C9 0.027(4) 0.029(4) 0.030(4) -0.004(3) 0.006(3) 0.000(3)
C10 0.027(3) 0.024(4) 0.033(3) -0.005(3) -0.001(2) 0.002(3)
C11 0.030(3) 0.021(3) 0.022(3) -0.003(3) -0.004(2) -0.003(3)
C12 0.023(3) 0.026(3) 0.025(2) 0.001(3) 0.003(2) -0.001(3)
C13 0.020(3) 0.030(3) 0.049(3) -0.001(3) 0.000(2) 0.000(3)
C14 0.037(3) 0.027(3) 0.025(3) 0.007(3) 0.009(2) 0.001(3)
C15 0.018(2) 0.024(3) 0.025(3) -0.006(3) 0.000(2) 0.000(2)
C16 0.013(3) 0.024(3) 0.036(3) 0.000(3) 0.008(2) 0.000(3)
C17 0.038(3) 0.032(4) 0.029(3) -0.002(3) 0.000(3) -0.005(3)
C18 0.033(3) 0.047(4) 0.023(3) 0.003(3) 0.002(3) 0.006(3)
C19 0.035(4) 0.088(7) 0.024(4) 0.004(3) 0.006(3) 0.002(3)
C20 0.029(4) 0.043(4) 0.034(3) -0.006(3) 0.004(3) -0.006(3)

```

\_geom\_special\_details

;

All esds (except the esd in the dihedral angle between two l.s. planes) are estimated using the full covariance matrix. The cell esds are taken into account individually in the estimation of esds in distances, angles and torsion angles; correlations between esds in cell parameters are only

used when they are defined by crystal symmetry. An approximate (isotropic)

treatment of cell esds is used for estimating esds involving l.s. planes.

;

loop\_

```

_geom_bond_atom_site_label_1
_geom_bond_atom_site_label_2
_geom_bond_distance
_geom_bond_site_symmetry_2
_geom_bond_publ_flag

```

```

O1 C16 1.216(4) . ?
O2 C16 1.360(4) . ?
O2 C2 1.474(4) . ?
O3 C7 1.439(5) . ?
O3 C8 1.453(5) . ?
O4 C11 1.445(4) . ?

```

O4 O5 1.465(3) . ?  
C1 C15 1.318(5) . ?  
C1 C14 1.499(5) . ?  
C1 C2 1.504(5) . ?  
C2 C3 1.488(5) . ?  
C3 C4 1.320(5) . ?  
C4 C18 1.502(5) . ?  
C4 C5 1.508(5) . ?  
C5 C6 1.531(6) . ?  
C6 C7 1.487(5) . ?  
C7 C8 1.462(5) . ?  
C8 C19 1.497(6) . ?  
C8 C9 1.498(5) . ?  
C9 C10 1.530(6) . ?  
C10 C11 1.528(5) . ?  
C11 C12 1.502(5) . ?  
C12 C20 1.325(5) . ?  
C12 C13 1.509(5) . ?  
C13 C14 1.529(5) . ?  
C15 C16 1.444(5) . ?  
C15 C17 1.492(5) . ?

loop\_

\_geom\_angle\_atom\_site\_label\_1  
\_geom\_angle\_atom\_site\_label\_2  
\_geom\_angle\_atom\_site\_label\_3  
\_geom\_angle  
\_geom\_angle\_site\_symmetry\_1  
\_geom\_angle\_site\_symmetry\_3  
\_geom\_angle\_publ\_flag  
C16 O2 C2 107.8(3) . . ?  
C7 O3 C8 60.8(2) . . ?  
C11 O4 O5 106.5(3) . . ?  
C15 C1 C14 128.2(4) . . ?  
C15 C1 C2 110.2(3) . . ?  
C14 C1 C2 121.6(4) . . ?  
O2 C2 C3 110.7(3) . . ?  
O2 C2 C1 103.1(3) . . ?  
C3 C2 C1 117.7(4) . . ?  
C4 C3 C2 125.7(4) . . ?  
C3 C4 C18 123.7(4) . . ?  
C3 C4 C5 122.0(4) . . ?  
C18 C4 C5 114.3(4) . . ?  
C4 C5 C6 114.7(4) . . ?  
C7 C6 C5 110.7(4) . . ?  
O3 C7 C8 60.1(2) . . ?  
O3 C7 C6 118.4(3) . . ?  
C8 C7 C6 126.0(4) . . ?  
O3 C8 C7 59.1(2) . . ?  
O3 C8 C19 114.9(4) . . ?  
C7 C8 C19 121.2(4) . . ?  
O3 C8 C9 114.3(4) . . ?  
C7 C8 C9 119.0(4) . . ?  
C19 C8 C9 115.3(4) . . ?

C8 C9 C10 112.2(4) . . ?  
C11 C10 C9 114.0(4) . . ?  
O4 C11 C12 106.9(3) . . ?  
O4 C11 C10 111.0(3) . . ?  
C12 C11 C10 112.7(3) . . ?  
C20 C12 C11 123.5(4) . . ?  
C20 C12 C13 123.3(4) . . ?  
C11 C12 C13 113.2(4) . . ?  
C12 C13 C14 115.5(4) . . ?  
C1 C14 C13 111.8(4) . . ?  
C1 C15 C16 108.2(3) . . ?  
C1 C15 C17 130.9(4) . . ?  
C16 C15 C17 120.9(4) . . ?  
O1 C16 O2 119.4(4) . . ?  
O1 C16 C15 130.0(4) . . ?  
O2 C16 C15 110.5(4) . . ?

|                                           |        |
|-------------------------------------------|--------|
| _diffraction_measured_fraction_theta_max  | 0.999  |
| _diffraction_reflns_theta_full            | 18.45  |
| _diffraction_measured_fraction_theta_full | 0.999  |
| _refine_diff_density_max                  | 0.071  |
| _refine_diff_density_min                  | -0.079 |
| _refine_diff_density_rms                  | 0.020  |

data\_2010031501brwparere35561\_0m

```
_audit_creation_method          SHELXL-97
_chemical_name_systematic
;
?
;
_chemical_name_common           ?
_chemical_melting_point         ?
_chemical_formula_moiety        ?
_chemical_formula_sum           'C20 H28 O5'
_chemical_formula_weight        348.42

loop_
  _atom_type_symbol
  _atom_type_description
  _atom_type_scat_dispersion_real
  _atom_type_scat_dispersion_imag
  _atom_type_source
  'C'  'C'  0.0033  0.0016
  'International Tables Vol C Tables 4.2.6.8 and 6.1.1.4'
  'H'  'H'  0.0000  0.0000
  'International Tables Vol C Tables 4.2.6.8 and 6.1.1.4'
  'O'  'O'  0.0106  0.0060
  'International Tables Vol C Tables 4.2.6.8 and 6.1.1.4'

_symmetry_cell_setting          ?
_symmetry_space_group_name_H-M  P2(1)2(1)2(1)

loop_
  _symmetry_equiv_pos_as_xyz
  'x, y, z'
  'x+1/2, -y+1/2, -z'
  '-x, y+1/2, -z+1/2'
  '-x+1/2, -y, z+1/2'

_cell_length_a                  9.542(3)
_cell_length_b                  10.416(3)
_cell_length_c                  19.612(6)
_cell_angle_alpha               90.00
_cell_angle_beta                90.00
_cell_angle_gamma               90.00
_cell_volume                    1949.1(10)
_cell_formula_units_Z           4
_cell_measurement_temperature   150(2)
_cell_measurement_reflns_used   105
_cell_measurement_theta_min     2.08
_cell_measurement_theta_max     18.05

_exptl_crystal_description      plate
_exptl_crystal_colour           colourless
_exptl_crystal_size_max         0.5
```

```

_exptl_crystal_size_mid          0.3
_exptl_crystal_size_min          0.1
_exptl_crystal_density_meas      ?
_exptl_crystal_density_diffn     1.187
_exptl_crystal_density_method    'not measured'
_exptl_crystal_F_000             752
_exptl_absorpt_coefficient_mu     0.084
_exptl_absorpt_correction_type    multiscan
_exptl_absorpt_correction_T_min   0.6689
_exptl_absorpt_correction_T_max   0.7442
_exptl_absorpt_process_details    ?

_exptl_special_details
;
?
;

_diffn_ambient_temperature        150(2)
_diffn_radiation_wavelength       0.71073
_diffn_radiation_type             MoK\a
_diffn_radiation_source           'fine-focus sealed tube'
_diffn_radiation_monochromator     graphite
_diffn_measurement_device_type     Bruker Smart Apex II
_diffn_measurement_method         ?
_diffn_detector_area_resol_mean   ?
_diffn_reflns_number              9176
_diffn_reflns_av_R_equivalents    0.0416
_diffn_reflns_av_sigmaI/netI     0.0243
_diffn_reflns_limit_h_min         -8
_diffn_reflns_limit_h_max         8
_diffn_reflns_limit_k_min         -9
_diffn_reflns_limit_k_max         9
_diffn_reflns_limit_l_min         -17
_diffn_reflns_limit_l_max         16
_diffn_reflns_theta_min           2.08
_diffn_reflns_theta_max           17.97
_reflns_number_total              1332
_reflns_number_gt                 1255
_reflns_threshold_expression       >2sigma(I)

_computing_data_collection        ?
_computing_cell_refinement        ?
_computing_data_reduction         ?
_computing_structure_solution     'SHELXS-97 (Sheldrick, 2008)'
_computing_structure_refinement   'SHELXL-97 (Sheldrick, 2008)'
_computing_molecular_graphics     ?
_computing_publication_material   ?

```

\_refine\_special\_details

;

Refinement of  $F^2$  against ALL reflections. The weighted R-factor wR and

goodness of fit S are based on  $F^2$ , conventional R-factors R are based on F, with F set to zero for negative  $F^2$ . The threshold expression of

$F^2 > 2\sigma(F^2)$  is used only for calculating R-factors(gt) etc. and is not relevant to the choice of reflections for refinement. R-factors based on  $F^2$  are statistically about twice as large as those based on F, and R-factors based on ALL data will be even larger.

```

_refine_ls_structure_factor_coef  Fsqd
_refine_ls_matrix_type            full
_refine_ls_weighting_scheme       calc
_refine_ls_weighting_details
'calc w=1/[\s^2*(Fo^2)+(0.0136P)^2+0.5000P] where P=(Fo^2+2Fc^2)/3'
_atom_sites_solution_primary      direct
_atom_sites_solution_secondary    difmap
_atom_sites_solution_hydrogens    geom
_refine_ls_hydrogen_treatment     mixed
_refine_ls_extinction_method      SHELXL
_refine_ls_extinction_coef        0.0027(5)
_refine_ls_extinction_expression
'Fc**=kFc[1+0.001xFc^2\l^3^/sin(2\q)]^-1/4^'
_refine_ls_abs_structure_details
'Flack H D (1983), Acta Cryst. A39, 876-881'
_refine_ls_abs_structure_Flack    0.8(14)
_refine_ls_number_reflns         1332
_refine_ls_number_parameters      235
_refine_ls_number_restraints      0
_refine_ls_R_factor_all           0.0243
_refine_ls_R_factor_gt            0.0215
_refine_ls_wR_factor_ref          0.0466
_refine_ls_wR_factor_gt          0.0451
_refine_ls_goodness_of_fit_ref    1.042
_refine_ls_restrained_S_all       1.042
_refine_ls_shift/su_max           0.001
_refine_ls_shift/su_mean          0.000

```

loop\_

```

_atom_site_label
_atom_site_type_symbol
_atom_site_fract_x
_atom_site_fract_y
_atom_site_fract_z
_atom_site_U_iso_or_equiv
_atom_site_adp_type
_atom_site_occupancy
_atom_site_symmetry_multiplicity
_atom_site_calc_flag
_atom_site_refinement_flags
_atom_site_disorder_assembly
_atom_site_disorder_group
O1 O -0.1321(2) 1.1529(2) 0.29732(10) 0.0436(6) Uani 1 1 d . . .
O2 O 0.0121(2) 1.09969(19) 0.38258(12) 0.0389(6) Uani 1 1 d . . .
O3 O 0.5509(2) 0.86676(19) 0.46394(9) 0.0437(6) Uani 1 1 d . . .

```

O4 O 0.45788(18) 0.73560(18) 0.20531(10) 0.0364(5) Uani 1 1 d . . . .  
O5 O 0.3656(2) 0.76444(18) 0.14722(9) 0.0417(6) Uani 1 1 d . . . .  
C1 C 0.1565(3) 0.9622(3) 0.32053(16) 0.0255(8) Uani 1 1 d . . . .  
C2 C 0.1366(3) 1.0181(3) 0.39010(15) 0.0305(8) Uani 1 1 d . . . .  
H2A H 0.1158 0.9475 0.4231 0.037 Uiso 1 1 calc R . . . .  
C3 C 0.2565(3) 1.0959(3) 0.41599(18) 0.0322(8) Uani 1 1 d . . . .  
H3A H 0.2976 1.1542 0.3846 0.039 Uiso 1 1 calc R . . . .  
C4 C 0.3120(3) 1.0928(3) 0.47763(18) 0.0352(9) Uani 1 1 d . . . .  
C5 C 0.4379(3) 1.1730(3) 0.49402(15) 0.0425(9) Uani 1 1 d . . . .  
H5A H 0.4174 1.2257 0.5348 0.051 Uiso 1 1 calc R . . . .  
H5B H 0.4560 1.2323 0.4555 0.051 Uiso 1 1 calc R . . . .  
C6 C 0.5702(3) 1.0934(3) 0.50744(15) 0.0447(9) Uani 1 1 d . . . .  
H6A H 0.6519 1.1516 0.5113 0.054 Uiso 1 1 calc R . . . .  
H6B H 0.5600 1.0474 0.5513 0.054 Uiso 1 1 calc R . . . .  
C7 C 0.5968(3) 0.9975(3) 0.45152(15) 0.0370(8) Uani 1 1 d . . . .  
H7A H 0.5783 1.0300 0.4044 0.044 Uiso 1 1 calc R . . . .  
C8 C 0.6987(3) 0.8926(3) 0.45549(17) 0.0382(9) Uani 1 1 d . . . .  
C9 C 0.7587(3) 0.8336(3) 0.39118(16) 0.0429(9) Uani 1 1 d . . . .  
H9A H 0.8590 0.8572 0.3880 0.051 Uiso 1 1 calc R . . . .  
H9B H 0.7535 0.7390 0.3953 0.051 Uiso 1 1 calc R . . . .  
C10 C 0.6873(3) 0.8728(3) 0.32604(17) 0.0405(9) Uani 1 1 d . . . .  
H10A H 0.7179 0.9505 0.3054 0.049 Uiso 1 1 calc R . . . .  
C11 C 0.5873(3) 0.8101(3) 0.29519(17) 0.0350(9) Uani 1 1 d . . . .  
H11A H 0.5638 0.7278 0.3126 0.042 Uiso 1 1 calc R . . . .  
C12 C 0.5062(3) 0.8569(3) 0.23456(14) 0.0303(8) Uani 1 1 d . . . .  
C13 C 0.3821(3) 0.9399(2) 0.25696(13) 0.0289(8) Uani 1 1 d . . . .  
H13A H 0.4192 1.0185 0.2788 0.035 Uiso 1 1 calc R . . . .  
H13B H 0.3299 0.9668 0.2157 0.035 Uiso 1 1 calc R . . . .  
C14 C 0.2791(3) 0.8762(3) 0.30618(14) 0.0292(8) Uani 1 1 d . . . .  
H14A H 0.2452 0.7946 0.2862 0.035 Uiso 1 1 calc R . . . .  
H14B H 0.3277 0.8559 0.3494 0.035 Uiso 1 1 calc R . . . .  
C15 C 0.0582(3) 1.0064(3) 0.27873(16) 0.0276(8) Uani 1 1 d . . . .  
C16 C -0.0302(4) 1.0924(3) 0.31691(18) 0.0318(8) Uani 1 1 d . . . .  
C17 C 0.0317(3) 0.9813(3) 0.20479(14) 0.0454(9) Uani 1 1 d . . . .  
H17A H 0.0879 0.9077 0.1899 0.068 Uiso 1 1 calc R . . . .  
H17B H 0.0578 1.0572 0.1781 0.068 Uiso 1 1 calc R . . . .  
H17C H -0.0679 0.9625 0.1979 0.068 Uiso 1 1 calc R . . . .  
C18 C 0.2593(3) 1.0096(3) 0.53504(15) 0.0527(10) Uani 1 1 d . . . .  
H18A H 0.1804 0.9576 0.5189 0.079 Uiso 1 1 calc R . . . .  
H18B H 0.2285 1.0641 0.5729 0.079 Uiso 1 1 calc R . . . .  
H18C H 0.3349 0.9530 0.5506 0.079 Uiso 1 1 calc R . . . .  
C19 C 0.7876(4) 0.8734(3) 0.51807(15) 0.0642(11) Uani 1 1 d . . . .  
H19A H 0.8174 0.7834 0.5207 0.096 Uiso 1 1 calc R . . . .  
H19B H 0.7330 0.8952 0.5588 0.096 Uiso 1 1 calc R . . . .  
H19C H 0.8704 0.9289 0.5155 0.096 Uiso 1 1 calc R . . . .  
C20 C 0.5947(3) 0.9288(3) 0.18257(14) 0.0391(9) Uani 1 1 d . . . .  
H20A H 0.5378 0.9479 0.1422 0.059 Uiso 1 1 calc R . . . .  
H20B H 0.6750 0.8757 0.1693 0.059 Uiso 1 1 calc R . . . .  
H20C H 0.6284 1.0093 0.2027 0.059 Uiso 1 1 calc R . . . .  
H5 H 0.258(5) 0.712(4) 0.168(2) 0.165(18) Uiso 1 1 d . . . .

loop\_

\_atom\_site\_aniso\_label

\_atom\_site\_aniso\_U\_11

```

_atom_site_aniso_U_22
_atom_site_aniso_U_33
_atom_site_aniso_U_23
_atom_site_aniso_U_13
_atom_site_aniso_U_12
O1 0.0320(13) 0.0425(14) 0.0563(15) 0.0035(12) 0.0045(14) 0.0121(13)
O2 0.0389(15) 0.0431(14) 0.0347(16) -0.0104(12) 0.0015(12) 0.0101(13)
O3 0.0451(15) 0.0370(16) 0.0490(14) -0.0003(11) 0.0013(12) -0.0086(12)
O4 0.0354(12) 0.0284(14) 0.0455(14) -0.0075(12) -0.0004(11) 0.0021(12)
O5 0.0446(13) 0.0477(14) 0.0330(13) -0.0037(12) -0.0074(13) -0.0036(12)
C1 0.027(2) 0.023(2) 0.026(2) -0.0043(18) 0.006(2) 0.0003(18)
C2 0.031(2) 0.030(2) 0.031(2) 0.0030(18) -0.0011(18) 0.010(2)
C3 0.038(2) 0.028(2) 0.031(2) -0.0046(18) 0.0034(18) -0.003(2)
C4 0.043(2) 0.032(2) 0.031(2) -0.0084(19) -0.002(2) 0.001(2)
C5 0.054(2) 0.036(2) 0.038(2) -0.0091(17) -0.005(2) -0.002(2)
C6 0.044(2) 0.046(2) 0.044(2) -0.005(2) -0.0109(18) -0.008(2)
C7 0.037(2) 0.037(2) 0.036(2) 0.000(2) -0.0021(17) -0.011(2)
C8 0.030(2) 0.041(2) 0.044(2) 0.002(2) -0.009(2) -0.003(2)
C9 0.035(2) 0.042(2) 0.051(2) 0.003(2) -0.005(2) -0.0004(17)
C10 0.037(2) 0.043(2) 0.041(2) 0.0019(19) 0.0015(19) 0.003(2)
C11 0.030(2) 0.029(2) 0.045(2) -0.0038(19) 0.001(2) 0.0029(18)
C12 0.0295(19) 0.026(2) 0.035(2) -0.0045(19) -0.002(2) -0.0006(19)
C13 0.0276(19) 0.0243(19) 0.035(2) -0.0030(16) -0.0010(17) 0.0012(18)
C14 0.0332(19) 0.0253(19) 0.0291(19) -0.0024(17) 0.0011(17) -0.0032(19)
C15 0.023(2) 0.032(2) 0.027(2) -0.0020(19) -0.001(2) 0.003(2)
C16 0.023(2) 0.030(2) 0.042(3) 0.000(2) 0.001(2) 0.003(2)
C17 0.040(2) 0.061(2) 0.035(2) -0.0036(18) -0.0036(18) 0.0081(19)
C18 0.059(2) 0.066(2) 0.033(2) -0.006(2) 0.0000(18) -0.008(2)
C19 0.068(3) 0.071(3) 0.053(2) -0.005(2) -0.026(2) 0.019(2)
C20 0.037(2) 0.041(2) 0.039(2) 0.0007(17) 0.0058(18) -0.0064(18)

```

\_geom\_special\_details

;

All esds (except the esd in the dihedral angle between two l.s. planes) are estimated using the full covariance matrix. The cell esds are taken into account individually in the estimation of esds in distances, angles and torsion angles; correlations between esds in cell parameters are only

used when they are defined by crystal symmetry. An approximate (isotropic)

treatment of cell esds is used for estimating esds involving l.s. planes.

;

loop\_

```

_geom_bond_atom_site_label_1
_geom_bond_atom_site_label_2
_geom_bond_distance
_geom_bond_site_symmetry_2
_geom_bond_publ_flag

```

```

O1 C16 1.221(3) . ?
O2 C16 1.352(3) . ?
O2 C2 1.468(3) . ?
O3 C8 1.445(3) . ?

```



O3 C7 1.451(3) . ?  
O4 C12 1.462(3) . ?  
O4 O5 1.471(2) . ?  
O5 H5 1.23(5) . ?  
C1 C15 1.328(3) . ?  
C1 C2 1.495(4) . ?  
C1 C14 1.500(4) . ?  
C2 C3 1.492(4) . ?  
C2 H2A 1.0000 . ?  
C3 C4 1.320(4) . ?  
C3 H3A 0.9500 . ?  
C4 C5 1.498(4) . ?  
C4 C18 1.507(4) . ?  
C5 C6 1.533(4) . ?  
C5 H5A 0.9900 . ?  
C5 H5B 0.9900 . ?  
C6 C7 1.505(4) . ?  
C6 H6A 0.9900 . ?  
C6 H6B 0.9900 . ?  
C7 C8 1.464(4) . ?  
C7 H7A 1.0000 . ?  
C8 C19 1.506(4) . ?  
C8 C9 1.515(4) . ?  
C9 C10 1.504(4) . ?  
C9 H9A 0.9900 . ?  
C9 H9B 0.9900 . ?  
C10 C11 1.306(4) . ?  
C10 H10A 0.9500 . ?  
C11 C12 1.500(4) . ?  
C11 H11A 0.9500 . ?  
C12 C20 1.521(4) . ?  
C12 C13 1.531(4) . ?  
C13 C14 1.529(3) . ?  
C13 H13A 0.9900 . ?  
C13 H13B 0.9900 . ?  
C14 H14A 0.9900 . ?  
C14 H14B 0.9900 . ?  
C15 C16 1.440(4) . ?  
C15 C17 1.495(4) . ?  
C17 H17A 0.9800 . ?  
C17 H17B 0.9800 . ?  
C17 H17C 0.9800 . ?  
C18 H18A 0.9800 . ?  
C18 H18B 0.9800 . ?  
C18 H18C 0.9800 . ?  
C19 H19A 0.9800 . ?  
C19 H19B 0.9800 . ?  
C19 H19C 0.9800 . ?  
C20 H20A 0.9800 . ?  
C20 H20B 0.9800 . ?  
C20 H20C 0.9800 . ?

loop\_  
\_geom\_angle\_atom\_site\_label\_1

\_geom\_angle\_atom\_site\_label\_2  
\_geom\_angle\_atom\_site\_label\_3  
\_geom\_angle  
\_geom\_angle\_site\_symmetry\_1  
\_geom\_angle\_site\_symmetry\_3  
\_geom\_angle\_publ\_flag  
C16 O2 C2 107.7(2) . . ?  
C8 O3 C7 60.73(19) . . ?  
C12 O4 O5 108.44(18) . . ?  
O4 O5 H5 99.0(19) . . ?  
C15 C1 C2 109.8(2) . . ?  
C15 C1 C14 129.9(3) . . ?  
C2 C1 C14 120.2(3) . . ?  
O2 C2 C3 109.9(2) . . ?  
O2 C2 C1 103.7(2) . . ?  
C3 C2 C1 115.1(3) . . ?  
O2 C2 H2A 109.3 . . ?  
C3 C2 H2A 109.3 . . ?  
C1 C2 H2A 109.3 . . ?  
C4 C3 C2 127.3(3) . . ?  
C4 C3 H3A 116.3 . . ?  
C2 C3 H3A 116.3 . . ?  
C3 C4 C5 120.3(3) . . ?  
C3 C4 C18 124.3(3) . . ?  
C5 C4 C18 115.3(3) . . ?  
C4 C5 C6 113.3(2) . . ?  
C4 C5 H5A 108.9 . . ?  
C6 C5 H5A 108.9 . . ?  
C4 C5 H5B 108.9 . . ?  
C6 C5 H5B 108.9 . . ?  
H5A C5 H5B 107.7 . . ?  
C7 C6 C5 111.9(2) . . ?  
C7 C6 H6A 109.2 . . ?  
C5 C6 H6A 109.2 . . ?  
C7 C6 H6B 109.2 . . ?  
C5 C6 H6B 109.2 . . ?  
H6A C6 H6B 107.9 . . ?  
O3 C7 C8 59.44(19) . . ?  
O3 C7 C6 116.7(2) . . ?  
C8 C7 C6 124.6(3) . . ?  
O3 C7 H7A 114.8 . . ?  
C8 C7 H7A 114.8 . . ?  
C6 C7 H7A 114.8 . . ?  
O3 C8 C7 59.83(18) . . ?  
O3 C8 C19 115.6(3) . . ?  
C7 C8 C19 121.1(3) . . ?  
O3 C8 C9 112.8(2) . . ?  
C7 C8 C9 120.6(3) . . ?  
C19 C8 C9 114.3(3) . . ?  
C10 C9 C8 115.2(2) . . ?  
C10 C9 H9A 108.5 . . ?  
C8 C9 H9A 108.5 . . ?  
C10 C9 H9B 108.5 . . ?  
C8 C9 H9B 108.5 . . ?

H9A C9 H9B 107.5 . . ?  
C11 C10 C9 126.1(3) . . ?  
C11 C10 H10A 117.0 . . ?  
C9 C10 H10A 117.0 . . ?  
C10 C11 C12 125.6(3) . . ?  
C10 C11 H11A 117.2 . . ?  
C12 C11 H11A 117.2 . . ?  
O4 C12 C11 101.1(2) . . ?  
O4 C12 C20 109.7(2) . . ?  
C11 C12 C20 113.9(2) . . ?  
O4 C12 C13 110.9(2) . . ?  
C11 C12 C13 110.8(2) . . ?  
C20 C12 C13 110.1(2) . . ?  
C14 C13 C12 115.7(2) . . ?  
C14 C13 H13A 108.4 . . ?  
C12 C13 H13A 108.4 . . ?  
C14 C13 H13B 108.4 . . ?  
C12 C13 H13B 108.4 . . ?  
H13A C13 H13B 107.4 . . ?  
C1 C14 C13 111.1(2) . . ?  
C1 C14 H14A 109.4 . . ?  
C13 C14 H14A 109.4 . . ?  
C1 C14 H14B 109.4 . . ?  
C13 C14 H14B 109.4 . . ?  
H14A C14 H14B 108.0 . . ?  
C1 C15 C16 107.9(3) . . ?  
C1 C15 C17 131.1(3) . . ?  
C16 C15 C17 120.9(3) . . ?  
O1 C16 O2 120.5(3) . . ?  
O1 C16 C15 128.6(3) . . ?  
O2 C16 C15 110.9(3) . . ?  
C15 C17 H17A 109.5 . . ?  
C15 C17 H17B 109.5 . . ?  
H17A C17 H17B 109.5 . . ?  
C15 C17 H17C 109.5 . . ?  
H17A C17 H17C 109.5 . . ?  
H17B C17 H17C 109.5 . . ?  
C4 C18 H18A 109.5 . . ?  
C4 C18 H18B 109.5 . . ?  
H18A C18 H18B 109.5 . . ?  
C4 C18 H18C 109.5 . . ?  
H18A C18 H18C 109.5 . . ?  
H18B C18 H18C 109.5 . . ?  
C8 C19 H19A 109.5 . . ?  
C8 C19 H19B 109.5 . . ?  
H19A C19 H19B 109.5 . . ?  
C8 C19 H19C 109.5 . . ?  
H19A C19 H19C 109.5 . . ?  
H19B C19 H19C 109.5 . . ?  
C12 C20 H20A 109.5 . . ?  
C12 C20 H20B 109.5 . . ?  
H20A C20 H20B 109.5 . . ?  
C12 C20 H20C 109.5 . . ?  
H20A C20 H20C 109.5 . . ?

H20B C20 H20C 109.5 . . ?

|                                           |        |
|-------------------------------------------|--------|
| _diffraction_measured_fraction_theta_max  | 1.000  |
| _diffraction_reflns_theta_full            | 17.97  |
| _diffraction_measured_fraction_theta_full | 1.000  |
| _refine_diff_density_max                  | 0.069  |
| _refine_diff_density_min                  | -0.079 |
| _refine_diff_density_rms                  | 0.017  |
